# Supplementary material for: Developing a diagnostic framework for patients presenting with Exercise Induced Leg Pain (EILP): a scoping review
Source: J Foot Ankle Res. 2023 Nov 21;16:82. doi: 10.1186/s13047-023-00680-6 (PMC10662794; doi:10.1186/s13047-023-00680-6)
Supplement: Supplementary file 4 — Additional file 4. Developing a framework for the diagnostic criteria of patients with EILP scoping review data charting table. The data charting table for this review. [file 13047_2023_680_MOESM4_ESM.xlsx]

## Sheet: Sheet 1
Study feature (Author/ year)	Study design	MMAT Rating	Condition	Reported definition	Definition agreed on	Definition reported 0=no 1=yes	Anatomical part involved reported	Reported distributions percentage 0=unilateral 1=bilateral		Reported distribution 0=unilateral 1=bilateral	Reported anatomical compartment involved 0=Ant-comp 1=Lat-comp 2=Sp-comp 3=Dp-comp				History 0= Medical history of other pathologies 1= No medical history 2= No cardiac history 3= Bilateral decompression for CECS 4= No taruma history 5= History of fainting once 6= Exertional pain 7= Non-exertional pain 8= Pain during rest 9= Pain relieved by rest 10= Direct/ indirect trauma onset 11= Gradual (insidious) onset of pain 12= sudden onset of pain 13= The pain get worse with activity o…
								0	1		0	1	2	3	0	1	2	3	4	5	6	7	8	9	10	11	12	13	14	15	16	17	18	19	20	21	22	23	24	25	26	27	28	29	30	31	32	33	34
Miller et al. 2021	Opinion piece / narrative review	0	Popliteal Artery Entrapment Syndrome (PAES)	N/A	PAES refers to popliteal artery compression caused by abnormal anatomy of the nearby musculotendinous structures or surrounding muscle hypertrophy, which can cause carious severe complications	0			25-40%	0	0	0	1	1	0	1	1	0	0	0	1	0	0	0	0	0	0	0	0	0	0	0	0	0	0	0	0	0	0	0	0	0	0	0	0	0	0	0	0
			Chronic Exertional Compartment Syndrome (CECS)	N/A	CECS is defined as a condition in which increased pressure within a limited space compromises the circulation and function of the contents of that space. Any cause of increased intercompartmental pressure may result in a compartmental syndrome. Or it is defined as reversible ischemia within a closed fibro-osseous space, which leads to decreased tissue perfusion and ischemic pain. CECS is often re…	0	Anterolateral or posterior leg		55-80%	1	1	1	1	1	0	0	0	0	0	0	1	0	0	0	0	0	0	0	1	0	0	1	0	0	0	0	0	0	0	0	0	0	0	0	0	0	0	0	0
Milgrom et al. 2021	Case series	3	Tibial stress fracture (Tibial SF)	N/A	Stress fracture is defined as a partial or complete fracture of bone that results from repeated application of stress lower than that required to fracture the bone in a single loading situation.	0	Medial border of the tibia				1	0	0	0	0	0	0	0	0	0	1	0	0	0	0	0	1	0	0	0	0	0	0	0	0	0	0	0	0	1	0	0	0	0	0	0	0	0	0
Lovelock et al. 2021	Systematic review	0	Popliteal Artery Entrapment Syndrome (PAES)	It is defined as an entrapment syndrome secondary to an abnormal relationship between the popliteal artery and the ad- jacent muscle and tendons. This may be as a consequence of an anomalous route of the popliteal artery, abnormality in the development or insertion of the MHOG, or compression of the artery by an accessory ligament or fibrous band.	PAES refers to popliteal artery compression caused by abnormal anatomy of the nearby musculotendinous structures or surrounding muscle hypertrophy, which can cause carious severe complications	1	Posterior leg				0	0	1	1	0	1	0	0	0	0	1	0	0	0	0	0	1	0	0	0	0	0	0	0	0	0	0	0	0	0	0	0	0	0	0	0	0	0	0
			Chronic Exertional Compartment Syndrome (CECS)	N/A	CECS is defined as a condition in which increased pressure within a limited space compromises the circulation and function of the contents of that space. Any cause of increased intercompartmental pressure may result in a compartmental syndrome. Or it is defined as reversible ischemia within a closed fibro-osseous space, which leads to decreased tissue perfusion and ischemic pain. CECS is often re…	0					1	1	1	1	0	1	0	0	0	0	1	0	0	0	0	0	0	0	1	0	0	0	0	0	0	0	0	0	0	0	0	0	0	0	0	0	0	0	0
			Medial Tibial Stress Syndrome (MTSS)	N/A	MTSS is defined as symptom complex seen in athletes who complain of exercise induced pain along the posteromedial border of the tibia and recognisable pain is provoked on palpation of this posteromedial tibial border over a length of ≥5 consecutive centimetres.	0					1	0	0	0	0	1	0	0	0	0	1	0	0	0	0	0	0	0	1	0	0	0	1	0	0	0	0	0	0	0	1	0	0	0	1	0	0	0	0
			Soleal sling syndrome	N/A	Soleal sling syndrome is a compression of the tibial nerve as it passes under the soleal sling ("Soleal Sling Syndrome")	0					1	0	1	1	0	1	0	0	0	0	0	0	0	0	0	0	0	0	0	0	0	0	0	0	0	0	0	0	0	0	0	0	0	0	0	0	0	0	0
			Radiculopathy/ sciatica	It's Shooting pain down the leg as a result of lumbar intervertebral disc herniation	Radiculopathy describes pain that radiates down the legs and is often described by patients as electric, burning, or sharp. The most common underlying cause of radiculopathy is irritation of a particular nerve, which can occur at any point along the nerve itself and is most often a result of a compressive force.	1					0	0	0	0	0	1	0	0	0	0	0	0	0	0	0	0	0	0	0	0	0	0	0	0	0	0	0	0	0	0	0	0	0	0	0	0	0	0	0
			Tibial stress fracture (Tibial SF)	N/A	Stress fracture is defined as a partial or complete fracture of bone that results from repeated application of stress lower than that required to fracture the bone in a single loading situation.	0					1	0	0	0	0	1	0	0	0	0	1	0	1	0	0	0	0	0	1	0	0	0	0	0	1	0	0	0	0	1	0	0	0	0	0	0	0	0	0
Lindorsson et at. 2021	Case series	4	Chronic Exertional Compartment Syndrome (CECS)	It is characterized by pain triggered by exertion, attributable to increased intramuscular pressure (IMP)and reduced tissue perfusion within muscle compartment. Now we are trucking	CECS is defined as a condition in which increased pressure within a limited space compromises the circulation and function of the contents of that space. Any cause of increased intercompartmental pressure may result in a compartmental syndrome. Or it is defined as reversible ischemia within a closed fibro-osseous space, which leads to decreased tissue perfusion and ischemic pain. CECS is often re…	1			67-95%	1	1	0	0	0	0	1	9	0	0	0	1	0	0	0	0	0	0	0	1	0	0	1	0	0	0	0	0	0	0	0	0	0	0	0	0	0	0	0	0
Ghasabmahaleh et al. 2021	RCT	4	Radiculopathy/ sciatica	N/A	Radiculopathy describes pain that radiates down the legs and is often described by patients as electric, burning, or sharp. The most common underlying cause of radiculopathy is irritation of a particular nerve, which can occur at any point along the nerve itself and is most often a result of a compressive force.	0				0	0	0	0	0	0	1	0	0	0	0	0	0	1	0	0	0	0	0	0	0	0	0	0	0	0	0	0	0	0	0	0	0	0	0	0	0	0	0	0
Al-Tayef et al. 2021	Case report	2	Popliteal Artery Entrapment Syndrome (PAES)	It refers to popliteal artery compression caused by abnormal anatomy of the nearby musculotendinous structures or surrounding muscle hypertrophy, which can cause carious severe complications. Good.	PAES refers to popliteal artery compression caused by abnormal anatomy of the nearby musculotendinous structures or surrounding muscle hypertrophy, which can cause carious severe complications	1	Left leg			0	0	0	1	1	0	1	1	0	0	0	1	0	0	0	0	0	0	0	0	0	0	0	0	0	0	0	0	0	0	0	0	0	0	0	0	0	0	0	0
Winters 2020	Opinion piece / narrative review	0	Medial Tibial Stress Syndrome (MTSS)	It's defined as exercise induced pain along the posteromedial tibial border, and recognisable pain is provoked on palpation of this posteromedial tibial border over a length of >5cm. mentioned?	MTSS is defined as symptom complex seen in athletes who complain of exercise induced pain along the posteromedial border of the tibia and recognisable pain is provoked on palpation of this posteromedial tibial border over a length of ≥5 consecutive centimetres.	1	Distal two thirds of the tibial medial border				1	0	0	0	0	1	0	0	0	0	1	0	0	0	0	0	0	0	1	0	0	1	0	0	0	0	0	0	0	0	1	0	0	0	0	0	0	0	0
Winkes et al. 2020	Opinion piece / narrative review	0	Chronic Exertional Compartment Syndrome (CECS)	It's pain in the area dorsomedial to the tibial bone usually towards the end of the run. The aetiology was associated with elevated tissue pressure in the deep flexor muscle compartment.	CECS is defined as a condition in which increased pressure within a limited space compromises the circulation and function of the contents of that space. Any cause of increased intercompartmental pressure may result in a compartmental syndrome. Or it is defined as reversible ischemia within a closed fibro-osseous space, which leads to decreased tissue perfusion and ischemic pain. CECS is often re…	0				0	0	0	0	1	0	1	0	0	0	0	1	0	0	0	0	0	0	0	1	0	0	1	0	0	0	0	0	0	0	0	0	0	0	0	0	0	0	0	0
Velasco et al. 2020	Opinion piece / narrative review	0	Chronic Exertional Compartment Syndrome (CECS)	N/A	CECS is defined as a condition in which increased pressure within a limited space compromises the circulation and function of the contents of that space. Any cause of increased intercompartmental pressure may result in a compartmental syndrome. Or it is defined as reversible ischemia within a closed fibro-osseous space, which leads to decreased tissue perfusion and ischemic pain. CECS is often re…	0				1	1	0	0	0	0	1	0	0	0	0	1	0	0	0	0	0	0	0	1	0	0	1	0	0	0	0	0	0	0	0	0	0	0	0	0	0	0	0	0
Van Zantvoot et al. 2020	Case series	3	Superficial Peroneal nerve entrapment (SPNE)	N/A	Nerve entrapment syndrome Is a mechanical compression of the nerve at or near the point where the nerve pierces the fascia to travel within the subcutaneous tissue. Surgical decompression of the mechanical entrapment usually provides relief from pain and paraesthesia.	0	Lower leg			1	1	1	0	0	0	1	0	1	0	0	1	0	0	0	0	0	0	0	1	0	0	0	0	0	0	1	0	0	0	0	0	0	0	0	0	0	0	0	0
			Tibial nerve entrapment	N/A	Nerve entrapment syndrome Is a mechanical compression of the nerve at or near the point where the nerve pierces the fascia to travel within the subcutaneous tissue. Surgical decompression of the mechanical entrapment usually provides relief from pain and paraesthesia.	0	Right leg			0	0	0	0	1	0	1	0	0	0	0	1	0	1	0	0	0	0	0	0	0	0	0	0	0	1	0	0	0	0	0	0	0	0	0	0	0	0	0	0
			Superficial Peroneal nerve entrapment (SPNE)	N/A	Nerve entrapment syndrome Is a mechanical compression of the nerve at or near the point where the nerve pierces the fascia to travel within the subcutaneous tissue. Surgical decompression of the mechanical entrapment usually provides relief from pain and paraesthesia.	0					1	1	0	1	0	1	0	0	0	0	0	0	1	0	1	0	0	0	1	0	0	0	0	0	1	1	0	0	0	0	0	0	0	0	0	0	0	0	0
Rosenthal et al. 2020	Case report	0	Popliteal Artery Entrapment Syndrome (PAES)	N/A	PAES refers to popliteal artery compression caused by abnormal anatomy of the nearby musculotendinous structures or surrounding muscle hypertrophy, which can cause carious severe complications	0	Low back and left leg			0	0	0	1	1	0	1	0	0	0	0	1	0	1	0	0	0	0	0	1	0	0	1	0	0	0	0	0	0	0	0	0	0	0	0	0	0	0	0	0
Pedret et al, 2020	Retrospective case series	4	Myofascial tears	N/A	It is identified as an injury to the muscle fibres or its attaching tendons.	0					0	0	0	0	0	0	0	0	0	0	0	1	1	0	1	0	0	0	0	0	0	0	0	0	0	0	0	0	0	0	0	0	0	0	0	0	0	0	0
Nawkibu et al. 2020	Opinion piece / narrative review	3	Chronic Exertional Compartment Syndrome (CECS)	It's defined as a transient increase in compartment pressures during physical activity, which causes pain, because of the inability of the fascial compartments to accommodate and is usually relieved by cessation of exercise.	CECS is defined as a condition in which increased pressure within a limited space compromises the circulation and function of the contents of that space. Any cause of increased intercompartmental pressure may result in a compartmental syndrome. Or it is defined as reversible ischemia within a closed fibro-osseous space, which leads to decreased tissue perfusion and ischemic pain. CECS is often re…	1	Ant-CECS 42-60% Lat-CECS 35-36% dp-CECS 19-32% sp-CECS 3-21%				1	1	1	1	2	1	0	0	0	0	1	0	0	0	0	0	0	0	1	0	0	1	0	0	0	0	1	0	0	0	0	0	0	0	0	0	0	0	0
Finnoff et al. 2020	Case report	2	Chronic Exertional Compartment Syndrome (CECS)	It is characterized by an excessive increase in intercompartmental muscle pressure during exercise that results in pain and occasionally neurologic symptoms that abate and rest.	CECS is defined as a condition in which increased pressure within a limited space compromises the circulation and function of the contents of that space. Any cause of increased intercompartmental pressure may result in a compartmental syndrome. Or it is defined as reversible ischemia within a closed fibro-osseous space, which leads to decreased tissue perfusion and ischemic pain. CECS is often re…	1	Anterolateral right leg			0	1	0	0	0	0	1	0	0	0	0	0	0	0	0	0	0	0	0	1	0	0	1	0	0	0	0	0	0	0	0	0	0	0	0	0	0	0	0	0
De Bruijn et al. 2020	Opinion piece / narrative review	0	Chronic Exertional Compartment Syndrome (CECS)	It is defined as recurrent exercise-induced pain and tightness in a portion of the leg due to elevated tissue pressure in a muscular compartment	CECS is defined as a condition in which increased pressure within a limited space compromises the circulation and function of the contents of that space. Any cause of increased intercompartmental pressure may result in a compartmental syndrome. Or it is defined as reversible ischemia within a closed fibro-osseous space, which leads to decreased tissue perfusion and ischemic pain. CECS is often re…	1	Usually isolated			1	1	0	0	0	0	1	0	0	0	0	1	0	0	0	0	0	0	0	1	0	0	1	0	0	0	0	0	0	0	0	0	0	0	0	0	0	0	0	0
			Chronic Exertional Compartment Syndrome (CECS)				With ant-CECS			1	0	1	0	0	0	0	0	0	0	0	0	0	0	0	0	0	0	0	0	0	0	0	0	0	0	0	0	0	0	0	0	0	0	0	0	0	0	0	0
			Chronic Exertional Compartment Syndrome (CECS)								0	0	1	0	0	0	0	0	0	0	0	0	0	0	0	0	0	0	0	0	0	0	0	0	0	0	0	0	0	0	0	0	0	0	0	0	0	0	0
			Chronic Exertional Compartment Syndrome (CECS)				Isolated			0	0	0	0	1	0	0	0	0	0	0	0	0	0	0	0	0	0	0	0	0	0	0	0	0	0	0	0	0	0	0	0	0	0	0	0	0	0	0	0
Thein et al. 2019	Non-RCT	4	Chronic Exertional Compartment Syndrome (CECS)	N/A	CECS is defined as a condition in which increased pressure within a limited space compromises the circulation and function of the contents of that space. Any cause of increased intercompartmental pressure may result in a compartmental syndrome. Or it is defined as reversible ischemia within a closed fibro-osseous space, which leads to decreased tissue perfusion and ischemic pain. CECS is often re…	0					1	0	0	0	0	1	0	0	0	0	1	0	0	0	0	0	0	0	1	0	0	1	0	0	0	0	0	0	0	0	0	0	0	0	0	0	0	0	0
Satpute et al. 2019	RCT	5	Radiculopathy/ sciatica	N/A	Radiculopathy describes pain that radiates down the legs and is often described by patients as electric, burning, or sharp. The most common underlying cause of radiculopathy is irritation of a particular nerve, which can occur at any point along the nerve itself and is most often a result of a compressive force.	0				0	0	0	0	0	0	1	0	0	0	0	0	1	1	0	0	0	0	0	0	0	0	0	0	0	0	0	0	0	0	0	0	0	0	0	0	0	0	0	0
Lohrer et al. 2019	Systematic review	0	Chronic Exertional Compartment Syndrome (CECS)	It is defined as pain, which develops during exercise and which is relieved by rest.	CECS is defined as a condition in which increased pressure within a limited space compromises the circulation and function of the contents of that space. Any cause of increased intercompartmental pressure may result in a compartmental syndrome. Or it is defined as reversible ischemia within a closed fibro-osseous space, which leads to decreased tissue perfusion and ischemic pain. CECS is often re…	0				1	1	1	1	1	0	1	0	0	0	0	1	0	0	0	0	0	0	0	1	0	0	1	0	0	0	0	0	0	0	0	0	0	0	0	0	0	0	0	0
			Medial Tibial Stress Syndrome (MTSS)	N/A	MTSS is defined as symptom complex seen in athletes who complain of exercise induced pain along the posteromedial border of the tibia and recognisable pain is provoked on palpation of this posteromedial tibial border over a length of ≥5 consecutive centimetres.	0	At the distal two thirds of the posteromedial tibial border				0	0	0	0	0	1	0	0	0	0	1	0	0	0	0	0	0	0	1	0	0	0	1	0	0	0	0	0	0	0	1	0	0	0	0	0	0	0	0
			Tibial stress fracture (Tibial SF)	It is defined as a pre-radiologic injury, insufficiency fractures result from reduced bone quality and develop without overload.	Stress fracture is defined as a partial or complete fracture of bone that results from repeated application of stress lower than that required to fracture the bone in a single loading situation.	1					0	0	0	0	0	0	0	0	0	0	1	0	0	0	0	0	0	0	1	0	0	0	0	0	1	1	0	0	0	1	0	0	0	0	0	0	0	0	0
			Popliteal Artery Entrapment Syndrome (PAES)	it's defined as claudication pain which is intermittently present In the leg and is reproducibly elicited by activity.	PAES refers to popliteal artery compression caused by abnormal anatomy of the nearby musculotendinous structures or surrounding muscle hypertrophy, which can cause carious severe complications	1				1	0	0	0	0	0	1	0	0	0	0	1	0	0	0	0	0	0	0	1	0	0	1	0	0	0	0	0	0	0	0	0	0	0	0	0	0	0	0	0
			Superficial Peroneal nerve entrapment (SPNE)	Nerve entrapment syndrome Is a mechanical compression of the nerve at or near the point where the nerve pierces the fascia to travel within the subcutaneous tissue. Surgical decompression of the mechanical entrapment usually provides relief from pain and paraesthesia.	Nerve entrapment syndrome Is a mechanical compression of the nerve at or near the point where the nerve pierces the fascia to travel within the subcutaneous tissue. Surgical decompression of the mechanical entrapment usually provides relief from pain and paraesthesia.	1					0	0	0	0	0	1	0	0	0	0	1	0	0	0	0	0	0	0	0	0	0	1	0	0	0	0	0	0	0	0	0	0	0	0	0	0	0	0	0
Kokalj et al. 2019	Case report	2	Tibial stress fracture (Tibial SF)	N/A	Stress fracture is defined as a partial or complete fracture of bone that results from repeated application of stress lower than that required to fracture the bone in a single loading situation.	0	Ankles			1	0	0	0	0	0	1	0	0	1	0	0	0	0	0	0	0	0	0	0	1	0	0	0	0	0	0	0	0	1	0	0	0	0	0	0	0	0	0	0
Drigny et al. 2019	Case report	3	Popliteal Artery Entrapment Syndrome (PAES)	N/A	PAES refers to popliteal artery compression caused by abnormal anatomy of the nearby musculotendinous structures or surrounding muscle hypertrophy, which can cause carious severe complications	0				1	1	1	0	0	0	0	0	0	0	1	1	0	0	0	0	0	0	0	1	0	0	1	0	0	0	0	0	0	0	1	0	0	0	0	0	0	0	0	0
			Chronic Exertional Compartment Syndrome (CECS)	N/A	CECS is defined as a condition in which increased pressure within a limited space compromises the circulation and function of the contents of that space. Any cause of increased intercompartmental pressure may result in a compartmental syndrome. Or it is defined as reversible ischemia within a closed fibro-osseous space, which leads to decreased tissue perfusion and ischemic pain. CECS is often re…	0					0	0	0	0	0	0	0	0	0	1	0	0	0	0	0	0	0	0	0	0	0	0	0	0	0	0	0	0	0	0	0	0	0	0	0	0	0	0	0
Winters et al. 2018	Cross-sectional study	4	Medial Tibial Stress Syndrome (MTSS)	It is defined as exercise-induced pain along the posteromedial tibial border, and recognisable pain is provoked on palpation of this posteromedial tibial border over a length of ≥5consecutive centimetres	MTSS is defined as symptom complex seen in athletes who complain of exercise induced pain along the posteromedial border of the tibia and recognisable pain is provoked on palpation of this posteromedial tibial border over a length of ≥5 consecutive centimetres.	1					0	0	0	0	0	0	0	0	0	0	1	0	0	0	0	0	0	0	1	0	0	0	1	0	0	0	0	0	0	0	1	0	0	0	0	0	0	0	0
Truex et al. 2018	Case report	2	Chronic Exertional Compartment Syndrome (CECS)	N/A	CECS is defined as a condition in which increased pressure within a limited space compromises the circulation and function of the contents of that space. Any cause of increased intercompartmental pressure may result in a compartmental syndrome. Or it is defined as reversible ischemia within a closed fibro-osseous space, which leads to decreased tissue perfusion and ischemic pain. CECS is often re…	0					0	0	0	0	0	0	0	0	0	1	0	0	0	0	0	0	0	0	0	0	0	0	0	0	0	0	0	0	0	0	0	0	0	0	0	0	0	0	0
Henry et al 2018	Case report	2	Popliteal Artery Entrapment Syndrome (PAES)	It is a condition whereby compression of the popliteal artery, popliteal vein, and/or tibial nerve in the popliteal fossa by surrounding musculoskeletal structures results in vascular and neurogenic symptoms	PAES refers to popliteal artery compression caused by abnormal anatomy of the nearby musculotendinous structures or surrounding muscle hypertrophy, which can cause carious severe complications	1				1	0	0	0	0	0	0	0	0	0	0	1	0	0	0	0	0	0	0	1	0	0	0	0	0	1	1	0	0	0	0	0	0	0	0	0	0	0	0	0
Hameed et al 2018	Opinion piece / narrative review	3	Popliteal Artery Entrapment Syndrome (PAES)	PAES refers to popliteal artery compression caused by abnormal anatomy of the nearby musculotendinous structures or surrounding muscle hypertrophy, which can cause carious severe complications	PAES refers to popliteal artery compression caused by abnormal anatomy of the nearby musculotendinous structures or surrounding muscle hypertrophy, which can cause carious severe complications	1			0.4	0	0	0	1	1	0	1	0	0	0	0	1	0	0	0	0	0	0	0	0	0	0	0	0	0	0	0	0	0	0	0	0	0	0	0	0	0	0	0	0
Fouasson-Chailloux et al. 2018	Case series	4	Chronic Exertional Compartment Syndrome (CECS)	It is characterized by pain occurring during physical activity. CECS corresponds to a progressive increase of pressure during exercise in the muscle compartment limited by fascia.	CECS is defined as a condition in which increased pressure within a limited space compromises the circulation and function of the contents of that space. Any cause of increased intercompartmental pressure may result in a compartmental syndrome. Or it is defined as reversible ischemia within a closed fibro-osseous space, which leads to decreased tissue perfusion and ischemic pain. CECS is often re…	1					0	0	0	0	0	0	0	0	0	0	1	0	0	0	0	0	0	0	1	0	0	1	0	0	0	0	0	0	0	0	0	0	0	0	0	0	0	0	0
de Bruijn et al. 2018	Retrospective case series	4	Chronic Exertional Compartment Syndrome (CECS)	N/A	CECS is defined as a condition in which increased pressure within a limited space compromises the circulation and function of the contents of that space. Any cause of increased intercompartmental pressure may result in a compartmental syndrome. Or it is defined as reversible ischemia within a closed fibro-osseous space, which leads to decreased tissue perfusion and ischemic pain. CECS is often re…	0			0.74	1	1	1	0	1	0	1	0	0	0	0	1	0	0	0	0	0	0	0	1	0	0	1	0	0	0	0	0	0	0	0	0	0	0	0	0	0	0	0	0
Carneiro Junior ET AL. 2018	Case report	2	Popliteal Artery Entrapment Syndrome (PAES)	PAES results from an anomalous relationship between the popliteal artery and the myofascial structures of the popliteal fossa	PAES refers to popliteal artery compression caused by abnormal anatomy of the nearby musculotendinous structures or surrounding muscle hypertrophy, which can cause carious severe complications	0	Left lower leg			0	0	0	0	0	0	0	1	0	0	0	0	0	0	0	0	0	0	0	0	0	0	0	0	0	0	0	0	1	0	0	0	0	0	0	0	0	0	0	0
Wuellner et al. 2017	Opinion piece / narrative review	0	Chronic Exertional Compartment Syndrome (CECS)	N/A	CECS is defined as a condition in which increased pressure within a limited space compromises the circulation and function of the contents of that space. Any cause of increased intercompartmental pressure may result in a compartmental syndrome. Or it is defined as reversible ischemia within a closed fibro-osseous space, which leads to decreased tissue perfusion and ischemic pain. CECS is often re…	0			0.79	1	1	0	0	0	0	0	0	0	0	0	1	0	0	0	0	0	0	0	1	0	0	1	0	0	0	0	0	0	0	0	0	1	0	0	0	0	0	0	0
Vajapey et al. 2017	Systematic review	0	Chronic Exertional Compartment Syndrome (CECS)	N/A	CECS is defined as a condition in which increased pressure within a limited space compromises the circulation and function of the contents of that space. Any cause of increased intercompartmental pressure may result in a compartmental syndrome. Or it is defined as reversible ischemia within a closed fibro-osseous space, which leads to decreased tissue perfusion and ischemic pain. CECS is often re…	0				1	0	0	0	0	0	1	0	0	1	0	1	0	0	0	0	0	0	0	1	0	0	1	0	0	0	0	0	0	0	0	0	0	1	0	0	0	0	0	0
Drexler et al, 2017	Case series	4	Chronic Exertional Compartment Syndrome (CECS)	It is a recurrent, reversible ischemic condition related to a marked increase in intramuscular pressure within a specific compartment during exertion secondary to a fibroosseous space that is noncompliant with volume expansion	CECS is defined as a condition in which increased pressure within a limited space compromises the circulation and function of the contents of that space. Any cause of increased intercompartmental pressure may result in a compartmental syndrome. Or it is defined as reversible ischemia within a closed fibro-osseous space, which leads to decreased tissue perfusion and ischemic pain. CECS is often re…	1					0	0	0	0	0	0	0	0	0	0	1	0	0	0	0	0	0	0	1	0	0	1	0	0	0	0	0	0	0	0	0	0	0	0	0	0	0	0	0
Cosculluela et al, 2017	Opinion piece / narrative review	2	Tibial stress fracture (Tibial SF)	These are overuse injuries commonly seen as a result of repetitive activities or extended duration of training.	Stress fracture is defined as a partial or complete fracture of bone that results from repeated application of stress lower than that required to fracture the bone in a single loading situation.	1					0	0	0	0	0	0	0	0	1	0	0	0	1	0	0	0	0	0	1	0	0	0	1	1	0	0	0	0	0	1	0	0	0	1	0	0	0	0	0
Cormier et al, 2017	Case report	3	Accessory low lying soleus muscle (ALLSM) (ASM)	N/A	Accessory low lying soleus muscle (ALLSM) (ASM) is a rare supernumerary anatomical variant that commonly presents as a posteromedial ankle swelling, which may become painful during physical activity. As it may mimic a soft tissue tumour, it is essential to differentiate this condition from ganglion, lipoma, haemangioma, synovium, and sarcoma. However, ASM may also present with a painful syndrome,…	0				1	0	0	1	1	0	0	0	0	1	0	1	0	0	1	0	0	0	0	0	0	0	0	0	0	0	0	0	0	0	1	0	0	0	1	0	1	0	0	0
Rajasekaran et al, 2016	Opinion piece / narrative review	0	Medial Tibial Stress Syndrome (MTSS)	It is pain along the distal posteromedial border of the tibia that occurs during exercises, excluding pain from ischemic origin or signs of stress fractures.	MTSS is defined as symptom complex seen in athletes who complain of exercise induced pain along the posteromedial border of the tibia and recognisable pain is provoked on palpation of this posteromedial tibial border over a length of ≥5 consecutive centimetres.	1					1	0	0	0	0	0	0	0	0	0	1	0	0	0	0	0	0	0	1	0	0	0	1	1	0	0	0	0	0	0	1	0	0	0	0	0	0	0	0
			Tibial stress fracture (Tibial SF)	N/A	Stress fracture is defined as a partial or complete fracture of bone that results from repeated application of stress lower than that required to fracture the bone in a single loading situation.	0					0	0	0	0	0	0	0	0	0	0	1	0	1	0	0	0	0	0	1	0	0	0	0	0	1	0	0	0	1	1	0	0	0	0	0	0	0	0	0
			Chronic Exertional Compartment Syndrome (CECS)	N/A	CECS is defined as a condition in which increased pressure within a limited space compromises the circulation and function of the contents of that space. Any cause of increased intercompartmental pressure may result in a compartmental syndrome. Or it is defined as reversible ischemia within a closed fibro-osseous space, which leads to decreased tissue perfusion and ischemic pain. CECS is often re…	0			0.82	1	1	1	1	1	0	0	0	0	0	0	1	0	0	0	0	0	0	0	1	0	1	1	0	0	0	0	0	0	0	0	0	0	1	0	0	0	0	0	0
			Popliteal Artery Entrapment Syndrome (PAES)	N/A	PAES refers to popliteal artery compression caused by abnormal anatomy of the nearby musculotendinous structures or surrounding muscle hypertrophy, which can cause carious severe complications	0					1	0	1	1	0	0	0	0	0	0	0	0	0	0	0	0	0	0	0	0	0	0	0	0	0	0	0	0	0	0	0	0	0	0	0	0	0	0	0
			Superficial Peroneal nerve entrapment (SPNE)	Superficial peroneal nerve syndrome is an entrapment neuropathy that results from mechanical compression of the nerve at or near the point where the nerve pierces the fascia to travel within the subcutaneous tissue. Surgical decom- pression of the mechanical entrapment usually provides relief from pain and paraesthesia.	Superficial peroneal nerve syndrome is an entrapment neuropathy that results from mechanical compression of the nerve at or near the point where the nerve pierces the fascia to travel within the subcutaneous tissue. Surgical decom- pression of the mechanical entrapment usually provides relief from pain and paraesthesia.	1					0	0	0	0	0	0	0	0	0	0	1	1	1	0	0	0	0	0	1	0	0	0	0	0	0	0	0	0	0	0	0	0	0	0	0	0	0	0	0
Orli et al, 2016	Cross-sectional study	4	Chronic Exertional Compartment Syndrome (CECS)	N/A	CECS is defined as a condition in which increased pressure within a limited space compromises the circulation and function of the contents of that space. Any cause of increased intercompartmental pressure may result in a compartmental syndrome. Or it is defined as reversible ischemia within a closed fibro-osseous space, which leads to decreased tissue perfusion and ischemic pain. CECS is often re…	0					0	0	0	0	0	0	0	0	0	0	1	0	0	0	0	0	0	0	1	0	0	1	0	0	0	0	0	0	0	0	0	0	0	0	0	0	0	0	0
Mclnnis et al, 2016	Systematic review	0	Tibial stress fracture (Tibial SF)	N/A	Stress fracture is defined as a partial or complete fracture of bone that results from repeated application of stress lower than that required to fracture the bone in a single loading situation.	0	Along the posteromedial aspect of the tibia				0	0	0	0	0	0	0	0	0	0	0	0	0	0	0	0	0	0	1	0	0	0	0	0	0	0	0	0	0	0	0	0	0	0	0	0	0	0	0
Feldman et al, 2016	Opinion piece / narrative review	0	Tibial stress fracture (Tibial SF)	N/A	Stress fracture is defined as a partial or complete fracture of bone that results from repeated application of stress lower than that required to fracture the bone in a single loading situation.	0					0	0	0	0	0	0	0	0	1	0	0	0	1	0	0	1	0	1	1	0	0	0	0	0	1	0	0	0	0	1	0	0	0	0	1	0	0	0	0
Braver 2016	Opinion piece / narrative review	0	Chronic Exertional Compartment Syndrome (CECS)	It is an increased pressure within a specific muscle compartment of the leg, which causes pressure on vessels and nerves causing the symptoms.	CECS is defined as a condition in which increased pressure within a limited space compromises the circulation and function of the contents of that space. Any cause of increased intercompartmental pressure may result in a compartmental syndrome. Or it is defined as reversible ischemia within a closed fibro-osseous space, which leads to decreased tissue perfusion and ischemic pain. CECS is often re…	1			0.8	1	0	0	0	0	0	0	0	0	0	0	1	0	0	0	0	0	0	0	1	0	0	1	0	0	0	0	0	0	0	0	0	0	0	0	0	0	0	0	0
Rubio et al, 2015	Case report	2	Accessory low lying soleus muscle (ALLSM) (ASM)	N/A	Accessory low lying soleus muscle (ALLSM) (ASM) is a rare supernumerary anatomical variant that commonly presents as a posteromedial ankle swelling, which may become painful during physical activity. As it may mimic a soft tissue tumour, it is essential to differentiate this condition from ganglion, lipoma, haemangioma, synovium, and sarcoma. However, ASM may also present with a painful syndrome,…	0					0	0	0	0	0	1	0	0	1	0	0	1	0	1	0	0	0	0	0	0	0	0	0	0	0	0	0	0	0	0	0	0	0	0	0	0	0	0	0
Roscoe et al, 2015	Case control study	4	Chronic Exertional Compartment Syndrome (CECS)	It is defined as a painful condition in which exercise induces high pressure within a closed myofascial space, resulting in a decrease in tissue perfusion and ischemia.	CECS is defined as a condition in which increased pressure within a limited space compromises the circulation and function of the contents of that space. Any cause of increased intercompartmental pressure may result in a compartmental syndrome. Or it is defined as reversible ischemia within a closed fibro-osseous space, which leads to decreased tissue perfusion and ischemic pain. CECS is often re…	0				1	0	0	0	0	0	0	0	0	0	0	1	0	0	0	0	0	0	0	1	0	0	1	0	0	0	0	0	0	0	0	0	0	0	0	0	0	0	0	0
Myers et al, 2015	Case report	0	Superficial Peroneal nerve entrapment (SPNE)	N/A	Nerve entrapment syndrome Is a mechanical compression of the nerve at or near the point where the nerve pierces the fascia to travel within the subcutaneous tissue. Surgical decompression of the mechanical entrapment usually provides relief from pain and paraesthesia.	0	Right leg				0	0	0	0	0	1	0	0	1	0	0	0	0	0	0	0	1	0	0	0	0	0	0	0	0	0	0	0	0	0	0	0	0	0	0	0	0	0	0
Joy et al, 2015	Opinion piece / narrative review	0	Popliteal Artery Entrapment Syndrome (PAES)	N/A	PAES refers to popliteal artery compression caused by abnormal anatomy of the nearby musculotendinous structures or surrounding muscle hypertrophy, which can cause carious severe complications	0					0	0	0	0	0	0	0	0	0	0	1	0	0	1	0	0	0	0	0	0	0	0	0	0	0	0	0	0	0	0	0	0	0	0	0	0	0	0	0
Flick et al, 2015	Opinion piece / narrative review	0	Chronic Exertional Compartment Syndrome (CECS)	N/A	CECS is defined as a condition in which increased pressure within a limited space compromises the circulation and function of the contents of that space. Any cause of increased intercompartmental pressure may result in a compartmental syndrome. Or it is defined as reversible ischemia within a closed fibro-osseous space, which leads to decreased tissue perfusion and ischemic pain. CECS is often re…	0					1	0	0	0	0	0	0	0	0	0	1	0	0	1	0	0	0	0	1	0	0	1	0	0	0	0	0	0	0	0	0	0	0	0	0	0	0	0	0
Burrus et al, 2015	Opinion piece / narrative review	0	Medial Tibial Stress Syndrome (MTSS)	It is defined as pain along the posteromedial border of the tibia that occurs due to exercise, which is reproduced by palpation of the posteromedial border of the tibia and is present over a length of five or more consecutive centimetres.	MTSS is defined as symptom complex seen in athletes who complain of exercise induced pain along the posteromedial border of the tibia and recognisable pain is provoked on palpation of this posteromedial tibial border over a length of ≥5 consecutive centimetres.	1					0	0	0	0	0	0	0	0	0	0	0	0	0	0	0	0	0	0	0	0	0	0	0	0	0	0	0	0	0	0	1	0	0	0	0	0	0	0	0
			Chronic Exertional Compartment Syndrome (CECS)	N/A	CECS is defined as a condition in which increased pressure within a limited space compromises the circulation and function of the contents of that space. Any cause of increased intercompartmental pressure may result in a compartmental syndrome. Or it is defined as reversible ischemia within a closed fibro-osseous space, which leads to decreased tissue perfusion and ischemic pain. CECS is often re…	0			0.8	1	0	0	0	0	0	0	0	0	0	0	0	0	0	1	0	0	0	0	1	0	0	1	0	0	0	0	0	0	0	0	0	0	1	0	0	0	0	0	0
			Tibial stress fracture (Tibial SF)	N/A	Stress fracture is defined as a partial or complete fracture of bone that results from repeated application of stress lower than that required to fracture the bone in a single loading situation.	0					0	0	0	0	1	0	0	0	0	0	0	0	0	1	0	1	0	0	0	0	0	0	0	0	1	0	0	0	1	1	0	0	0	0	1	0	0	0	0
			Popliteal Artery Entrapment Syndrome (PAES)	It involves dynamic compression of the popliteal artery as it passes through or around the 2 heads of the gastrocnemius causing intermittent claudication.	PAES refers to popliteal artery compression caused by abnormal anatomy of the nearby musculotendinous structures or surrounding muscle hypertrophy, which can cause carious severe complications	1			0.38		0	0	0	0	0	0	0	0	0	0	0	0	0	0	0	0	0	0	0	0	0	0	0	0	0	0	0	0	0	0	0	0	0	0	0	0	0	0	0
			Superficial Peroneal nerve entrapment (SPNE)	N/A	Nerve entrapment syndrome Is a mechanical compression of the nerve at or near the point where the nerve pierces the fascia to travel within the subcutaneous tissue. Surgical decompression of the mechanical entrapment usually provides relief from pain and paraesthesia.	0					0	0	0	0	1	0	0	0	0	0	1	0	0	0	0	0	0	1	1	0	0	0	0	0	0	0	0	0	0	0	0	0	0	0	0	0	0	0	0
Bonasia et al, 2015	Narrative review	3	Chronic Exertional Compartment Syndrome (CECS)	N/A	CECS is defined as a condition in which increased pressure within a limited space compromises the circulation and function of the contents of that space. Any cause of increased intercompartmental pressure may result in a compartmental syndrome. Or it is defined as reversible ischemia within a closed fibro-osseous space, which leads to decreased tissue perfusion and ischemic pain. CECS is often re…	0	More common at the anterior and lateral compartments		70-80%	1	1	1	1	1	0	0	0	0	0	0	1	0	0	0	0	0	0	0	1	0	0	1	0	0	0	0	0	0	0	0	0	0	1	0	0	0	0	0	0
			Tibial stress fracture (Tibial SF)	N/A	Stress fracture is defined as a partial or complete fracture of bone that results from repeated application of stress lower than that required to fracture the bone in a single loading situation.	0	More common at the posteromedial tibia				1	0	0	0	0	0	0	0	0	0	1	0	0	1	0	1	0	0	0	0	0	0	0	0	0	0	0	0	0	1	0	0	0	0	0	0	0	0	0
			Medial Tibial Stress Syndrome (MTSS)	N/A	MTSS is defined as symptom complex seen in athletes who complain of exercise induced pain along the posteromedial border of the tibia and recognisable pain is provoked on palpation of this posteromedial tibial border over a length of ≥5 consecutive centimetres.	0					0	0	0	0	0	0	0	0	0	0	1	0	0	1	0	0	0	0	1	0	0	0	1	0	0	0	0	0	0	0	1	0	0	0	0	0	0	0	0
			Popliteal Artery Entrapment Syndrome (PAES)	N/A	PAES refers to popliteal artery compression caused by abnormal anatomy of the nearby musculotendinous structures or surrounding muscle hypertrophy, which can cause carious severe complications	0					0	0	0	0	0	0	0	0	0	0	1	0	0	0	0	0	0	0	0	0	0	0	0	0	0	0	0	0	0	0	0	0	0	0	0	0	0	0	0
			Superficial Peroneal nerve entrapment (SPNE)	Superficial peroneal nerve syndrome is an entrapment neuropathy that results from mechanical compression of the nerve at or near the point where the nerve pierces the fascia to travel within the subcutaneous tissue. Surgical decom- pression of the mechanical entrapment usually provides relief from pain and paraesthesia.	Superficial peroneal nerve syndrome is an entrapment neuropathy that results from mechanical compression of the nerve at or near the point where the nerve pierces the fascia to travel within the subcutaneous tissue. Surgical decom- pression of the mechanical entrapment usually provides relief from pain and paraesthesia.	1					0	0	0	0	0	0	0	0	0	0	0	0	0	0	0	0	0	0	0	0	0	0	0	0	0	0	0	0	0	0	0	0	0	0	0	0	0	0	0
			Radiculopathy/ sciatica	Radicular pain often occurs because of compression or inflammation of a spinal nerve	Radiculopathy describes pain that radiates down the legs and is often described by patients as electric, burning, or sharp. The most common underlying cause of radiculopathy is irritation of a particular nerve, which can occur at any point along the nerve itself and is most often a result of a compressive force.	1					0	0	0	0	0	0	0	0	0	0	0	1	0	1	0	0	0	0	1	0	0	0	0	0	0	0	0	0	0	0	0	0	0	0	0	0	0	0	0
			Saphenous entrapment syndrome	N/A	Nerve entrapment syndrome Is a mechanical compression of the nerve at or near the point where the nerve pierces the fascia to travel within the subcutaneous tissue. Surgical decompression of the mechanical entrapment usually provides relief from pain and paraesthesia.	0					0	0	0	0	0	0	0	0	0	0	0	0	0	0	0	0	0	0	0	0	0	0	0	0	0	0	0	0	0	0	0	0	0	0	0	0	0	0	0
Williamson et al, 2014	Opinion piece / narrative review	0	Medial Tibial Stress Syndrome (MTSS)	MTSS is an exercise-related pain affecting the posteromedial aspect of the middle or distal tibia, generally affecting a length of at least 5cm	MTSS is defined as symptom complex seen in athletes who complain of exercise induced pain along the posteromedial border of the tibia and recognisable pain is provoked on palpation of this posteromedial tibial border over a length of ≥5 consecutive centimetres.	1				0	1	0	1	0	0	0	0	0	0	0	0	0	0	0	0	0	0	0	1	0	0	0	1	0	0	0	0	0	0	0	1	0	0	0	0	0	0	0	0
			Tibial stress fracture (Tibial SF)	N/A	Stress fracture is defined as a partial or complete fracture of bone that results from repeated application of stress lower than that required to fracture the bone in a single loading situation.	0				0	0	0	0	0	0	0	0	0	0	0	0	0	0	1	0	1	0	0	1	0	0	0	0	0	1	0	0	0	0	1	0	0	0	0	1	0	0	0	0
			Chronic Exertional Compartment Syndrome (CECS)	N/A	CECS is defined as a condition in which increased pressure within a limited space compromises the circulation and function of the contents of that space. Any cause of increased intercompartmental pressure may result in a compartmental syndrome. Or it is defined as reversible ischemia within a closed fibro-osseous space, which leads to decreased tissue perfusion and ischemic pain. CECS is often re…	0			85-90%	1	1	0	0	0	0	0	0	0	0	0	1	0	0	0	0	0	0	0	1	0	0	1	0	0	0	0	0	0	0	0	0	0	0	0	0	0	0	0	0
Tsilogianni et al, 2014	Case report	3	Popliteal Artery Entrapment Syndrome (PAES)	It is an entrapment occurs because of an abnormal relationship between the popliteal artery and the surrounding muscular structures in the popliteal fossa.	PAES refers to popliteal artery compression caused by abnormal anatomy of the nearby musculotendinous structures or surrounding muscle hypertrophy, which can cause carious severe complications	1	Left foot		29-67%	1	0	0	0	0	0	1	0	0	0	0	0	0	0	0	1	1	0	0	1	0	0	0	0	0	0	0	0	0	0	0	0	0	0	0	0	1	0	0	0
Jovicic et al, 2014	Case report	3	Medial Tibial Stress Syndrome (MTSS)	MTSS as a pain and discomfort in the lower region of the leg resulting from repetitive activity on hard surfaces, or due to forcible, excessive use of the foot flexors, the diagnosis should be limited to musculoskeletal inflammation, excluding stress fractures or ischemic disorders	MTSS is defined as symptom complex seen in athletes who complain of exercise induced pain along the posteromedial border of the tibia and recognisable pain is provoked on palpation of this posteromedial tibial border over a length of ≥5 consecutive centimetres.	1				1	0	0	0	0	0	1	0	0	0	0	0	0	0	0	1	0	0	0	1	0	0	0	1	0	0	0	0	0	0	0	1	0	0	0	0	0	0	0	0
Dunn et al, 2014	Opinion piece / narrative review	0	Chronic Exertional Compartment Syndrome (CECS)	N/A	CECS is defined as a condition in which increased pressure within a limited space compromises the circulation and function of the contents of that space. Any cause of increased intercompartmental pressure may result in a compartmental syndrome. Or it is defined as reversible ischemia within a closed fibro-osseous space, which leads to decreased tissue perfusion and ischemic pain. CECS is often re…	0			0.95	1	1	1	1	1	0	1	0	0	1	0	1	0	0	0	0	0	0	0	1	0	0	1	0	0	0	0	0	0	0	0	0	0	1	0	0	0	0	0	0
Craig 2013	Opinion piece / narrative review	0	Superficial Peroneal nerve entrapment (SPNE)	N/A	Superficial peroneal nerve syndrome is an entrapment neuropathy that results from mechanical compression of the nerve at or near the point where the nerve pierces the fascia to travel within the subcutaneous tissue. Surgical decom- pression of the mechanical entrapment usually provides relief from pain and paraesthesia.	0					0	0	0	0	0	0	0	0	0	0	0	0	0	0	0	0	0	0	0	0	0	0	0	0	0	0	0	0	0	0	0	0	0	0	0	0	0	0	0
			Radiculopathy/ sciatica	N/A	Radiculopathy describes pain that radiates down the legs and is often described by patients as electric, burning, or sharp. The most common underlying cause of radiculopathy is irritation of a particular nerve, which can occur at any point along the nerve itself and is most often a result of a compressive force.	0					0	0	0	0	0	0	0	0	0	0	0	0	0	0	0	0	0	0	0	0	0	0	0	0	0	0	0	0	0	0	0	0	0	0	0	0	0	0	0
Pegrum et al, 2012	Opinion piece / narrative review	3	Tibial stress fracture (Tibial SF)	N/A	Stress fracture is defined as a partial or complete fracture of bone that results from repeated application of stress lower than that required to fracture the bone in a single loading situation.	0					0	0	0	0	0	0	0	0	0	0	0	1	0	0	0	1	0	0	1	0	0	0	0	0	0	0	0	0	0	0	1	0	0	0	1	0	0	0	0
Murray et al, 2012	Opinion piece / narrative review	2	Chronic Exertional Compartment Syndrome (CECS)	N/A	CECS is defined as a condition in which increased pressure within a limited space compromises the circulation and function of the contents of that space. Any cause of increased intercompartmental pressure may result in a compartmental syndrome. Or it is defined as reversible ischemia within a closed fibro-osseous space, which leads to decreased tissue perfusion and ischemic pain. CECS is often re…	0					1	1	1	1	0	0	0	0	0	0	1	0	0	1	0	0	0	0	1	0	0	1	0	0	0	0	0	0	0	0	0	0	1	0	0	0	0	0	0
Murdock et al, 2012	Opinion piece / narrative review	0	Chronic Exertional Compartment Syndrome (CECS)	It has been described as a reversible muscle ischemia in an osteo- facial compartment secondary to muscular volume increase during exercise.	CECS is defined as a condition in which increased pressure within a limited space compromises the circulation and function of the contents of that space. Any cause of increased intercompartmental pressure may result in a compartmental syndrome. Or it is defined as reversible ischemia within a closed fibro-osseous space, which leads to decreased tissue perfusion and ischemic pain. CECS is often re…	1					0	0	0	0	0	0	0	0	0	0	1	0	0	1	0	1	0	0	1	0	0	1	0	0	0	0	0	0	0	0	0	0	0	0	0	0	0	0	0
Lane et al, 2012	Case series	3	Popliteal Artery Entrapment Syndrome (PAES)	N/A	PAES refers to popliteal artery compression caused by abnormal anatomy of the nearby musculotendinous structures or surrounding muscle hypertrophy, which can cause carious severe complications	0				0	0	0	0	0	0	0	0	0	0	0	0	0	0	1	0	0	0	0	1	0	0	0	0	0	1	0	0	0	0	0	0	0	0	0	0	0	0	0	0
George et al, 2012	Opinion piece / narrative review	0	Chronic Exertional Compartment Syndrome (CECS)	Chronic exertional compartment syndrome is defined as reversible ischemia within a closed fibro- osseous space, which leads to decreased tissue perfusion and ischemic pain. CECS is often recurrent and associated with repetitive physical activity.	CECS is defined as a condition in which increased pressure within a limited space compromises the circulation and function of the contents of that space. Any cause of increased intercompartmental pressure may result in a compartmental syndrome. Or it is defined as reversible ischemia within a closed fibro-osseous space, which leads to decreased tissue perfusion and ischemic pain. CECS is often re…	1				1	0	0	0	0	0	0	0	0	1	0	1	0	0	1	0	0	0	0	1	0	0	1	0	0	0	0	0	0	0	0	0	0	1	0	0	0	0	0	0
Patel et al, 2011	Opinion piece / narrative review	3	Tibial stress fracture (Tibial SF)	Stress fractures are common injuries that begin with repetitive and excessive stress on the bone. This leads to the acceleration of normal bone remodelling, the production of microfractures (caused by insufficient time for the bone to repair), the creation of a bone stress injury (i.e., stress reaction), and, eventually, a stress fracture.	Stress fracture is defined as a partial or complete fracture of bone that results from repeated application of stress lower than that required to fracture the bone in a single loading situation.	1					0	0	0	0	0	0	0	0	0	0	0	0	0	0	0	0	0	0	0	0	0	0	0	0	0	0	0	0	0	1	0	0	0	0	1	0	0	0	0
Wilder et al, 2010	Opinion piece / narrative review	0	Chronic Exertional Compartment Syndrome (CECS)	Chronic exertional compartment syndrome is defined as reversible ischemia secondary to a noncompliant osseofascial compartment that is unresponsive to the expansion of muscle volume that occurs with exercise.	CECS is defined as a condition in which increased pressure within a limited space compromises the circulation and function of the contents of that space. Any cause of increased intercompartmental pressure may result in a compartmental syndrome. Or it is defined as reversible ischemia within a closed fibro-osseous space, which leads to decreased tissue perfusion and ischemic pain. CECS is often re…	1					0	0	0	0	0	0	0	0	0	0	1	0	0	1	0	0	0	0	1	0	0	1	0	0	0	0	0	0	0	0	0	0	1	0	0	0	0	0	0
Van Boxem et al, 2010	Opinion piece / narrative review	0	Radiculopathy/ sciatica	It is a radiating pain in one or more lumbar or sacral dermatomes; it may or may not be accompanied by other radicular irritation symptoms and/or symptoms of decreased function.	Radiculopathy describes pain that radiates down the legs and is often described by patients as electric, burning, or sharp. The most common underlying cause of radiculopathy is irritation of a particular nerve, which can occur at any point along the nerve itself and is most often a result of a compressive force.	1					0	0	0	0	0	0	0	0	0	0	0	0	0	0	0	0	0	0	0	0	0	0	0	0	0	0	0	0	0	0	0	0	0	0	0	0	1	1	0
McDonald et al, 2010	Opinion piece / narrative review	0	Chronic Exertional Compartment Syndrome (CECS)	Compartment syndrome may be defined as increased tissue pressure in a closed myofascial space resulting in disturbed microcirculation and leading to irreversible neuromuscular ischemic damage	CECS is defined as a condition in which increased pressure within a limited space compromises the circulation and function of the contents of that space. Any cause of increased intercompartmental pressure may result in a compartmental syndrome. Or it is defined as reversible ischemia within a closed fibro-osseous space, which leads to decreased tissue perfusion and ischemic pain. CECS is often re…	1					1	1	1	1	0	0	0	0	0	0	1	0	0	1	0	0	0	0	1	0	0	1	0	0	0	0	0	0	0	0	0	0	0	0	0	0	0	0	0
Harrast et al, 2010	Opinion piece / narrative review	0	Tibial stress fracture (Tibial SF)	N/A	Stress fracture is defined as a partial or complete fracture of bone that results from repeated application of stress lower than that required to fracture the bone in a single loading situation.	0					0	0	0	0	0	0	0	0	0	0	0	0	1	0	0	1	0	0	1	0	0	0	0	0	0	0	0	0	0	1	0	0	0	0	1	0	0	0	0
			McArdle syndrome	N/A	Stress fracture is defined as a partial or complete fracture of bone that results from repeated application of stress lower than that required to fracture the bone in a single loading situation.	0					0	0	0	0	0	0	0	0	0	0	0	0	1	0	0	1	0	0	1	0	0	0	0	0	0	0	0	0	0	1	0	0	0	0	1	0	0	0	0
Gill et al, 2010	Opinion piece / narrative review	3	Chronic Exertional Compartment Syndrome (CECS)	It is an elevation of interstitial pressure within a closed fascial compartment, which can lead to irreversible nerve, vessel, and muscle damage.	CECS is defined as a condition in which increased pressure within a limited space compromises the circulation and function of the contents of that space. Any cause of increased intercompartmental pressure may result in a compartmental syndrome. Or it is defined as reversible ischemia within a closed fibro-osseous space, which leads to decreased tissue perfusion and ischemic pain. CECS is often re…	1			85-95%	1	0	0	0	0	0	0	0	0	1	0	1	0	0	1	0	0	0	0	1	0	0	1	0	0	0	0	0	0	0	0	0	0	0	0	0	0	0	0	0
Moen et al, 2009	Systematic review	3	Medial Tibial Stress Syndrome (MTSS)	It is pain or discomfort in the leg from repetitive running on hard surfaces or forcible excessive use of the foot flexors; diagnosis should be limited to musculotendinous inflammations, excluding fracture or ischaemic disorder	MTSS is defined as symptom complex seen in athletes who complain of exercise induced pain along the posteromedial border of the tibia and recognisable pain is provoked on palpation of this posteromedial tibial border over a length of ≥5 consecutive centimetres.	1					0	0	0	0	0	0	0	0	0	0	1	0	0	0	0	0	0	0	1	0	0	0	1	0	0	0	0	0	0	0	1	0	0	0	0	0	0	0	0
Galbraith et al, 2009	Systematic review	3	Medial Tibial Stress Syndrome (MTSS)	N/A	MTSS is defined as symptom complex seen in athletes who complain of exercise induced pain along the posteromedial border of the tibia and recognisable pain is provoked on palpation of this posteromedial tibial border over a length of ≥5 consecutive centimetres.	0					0	0	0	0	0	0	0	0	0	0	1	0	1	0	0	0	0	0	1	0	0	0	1	0	0	0	0	0	0	0	1	0	0	1	0	0	0	0	0
McAree et al, 2008	Case report	3	Popliteal Artery Entrapment Syndrome (PAES)	N/A	PAES refers to popliteal artery compression caused by abnormal anatomy of the nearby musculotendinous structures or surrounding muscle hypertrophy, which can cause carious severe complications	0				1	0	0	1	0	0	1	0	0	0	0	1	0	0	0	0	0	0	0	1	0	0	0	0	0	0	0	0	0	0	0	0	0	0	0	0	1	0	0	0
Lucia et al, 2008	Opinion piece / narrative review	2	McArdle syndrome	McArdle syndrome is a metabolic myopathy causing exercise induced rhabdomyolysis due to deficiency of muscle phosphorylase. It is an autosomal recessive disorder, presenting during childhood with symptoms related to musculoskeletal system.	McArdle syndrome is a metabolic myopathy causing exercise induced rhabdomyolysis due to deficiency of muscle phosphorylase. It is an autosomal recessive disorder, presenting during childhood with symptoms related to musculoskeletal system.	1					0	0	0	0	0	0	0	0	0	0	1	0	0	0	0	0	0	0	0	0	0	0	0	0	0	0	0	0	0	0	0	0	0	0	0	0	0	0	1
Farr et al, 2008	Case report	2	Chronic Exertional Compartment Syndrome (CECS)	CECS is defined as a condition in which increased pressure within a limited space compromises the circulation and function of the contents of that space. Any cause of increased intercompartmental pressure may result in a compartmental syndrome. Or it is defined as reversible ischemia within a closed fibro-osseous space, which leads to decreased tissue perfusion and ischemic pain. CECS is often re…	CECS is defined as a condition in which increased pressure within a limited space compromises the circulation and function of the contents of that space. Any cause of increased intercompartmental pressure may result in a compartmental syndrome. Or it is defined as reversible ischemia within a closed fibro-osseous space, which leads to decreased tissue perfusion and ischemic pain. CECS is often re…	1	Right lower leg			0	0	0	0	0	0	0	0	0	0	0	1	0	0	0	0	0	0	0	1	0	0	1	0	0	0	0	0	0	0	0	0	0	1	0	0	0	0	0	0
Young et al, 2006	Opinion piece / narrative review	0	Tibial stress fracture (Tibial SF)	N/A	Stress fracture is defined as a partial or complete fracture of bone that results from repeated application of stress lower than that required to fracture the bone in a single loading situation.	0					0	0	0	0	0	0	0	0	0	0	0	0	0	0	0	1	0	0	0	0	0	0	0	0	0	0	0	0	0	0	0	0	0	0	1	0	0	0	0
Yang et al, 2006	Case report	3	Superficial Peroneal nerve entrapment (SPNE)	N/A	Superficial peroneal nerve syndrome is an entrapment neuropathy that results from mechanical compression of the nerve at or near the point where the nerve pierces the fascia to travel within the subcutaneous tissue. Surgical decom- pression of the mechanical entrapment usually provides relief from pain and paraesthesia.	0	Right lower leg			0	0	0	0	0	0	0	0	0	1	0	0	1	0	1	0	0	0	0	0	0	0	0	0	0	0	0	1	1	0	0	0	0	0	0	0	0	0	0	0
Tzortziou et al, 2006	Cross-sectional study	4	Chronic Exertional Compartment Syndrome (CECS)	N/A	CECS is defined as a condition in which increased pressure within a limited space compromises the circulation and function of the contents of that space. Any cause of increased intercompartmental pressure may result in a compartmental syndrome. Or it is defined as reversible ischemia within a closed fibro-osseous space, which leads to decreased tissue perfusion and ischemic pain. CECS is often re…	0					0	0	0	0	0	0	0	0	0	0	1	0	0	1	0	0	0	0	1	0	0	1	0	0	0	0	0	0	0	0	0	0	0	0	0	0	0	0	0
Scharml et al, 2006	Case report	2	Tibial stress fracture (Tibial SF)	N/A	Stress fracture is defined as a partial or complete fracture of bone that results from repeated application of stress lower than that required to fracture the bone in a single loading situation.	0	Distal right tibia			0	0	0	0	0	0	1	0	0	1	0	1	0	0	0	0	0	0	0	0	0	0	0	0	0	0	0	0	0	0	0	0	0	0	0	1	0	0	0	0
Fredericson et al, 2006	Opinion piece / narrative review	0	Tibial stress fracture (Tibial SF)	It is best described as accelerated bony remodelling in response to repetitive submaximal stresses.	Stress fracture is defined as a partial or complete fracture of bone that results from repeated application of stress lower than that required to fracture the bone in a single loading situation.	1					0	0	0	0	0	0	0	0	0	0	0	0	0	0	0	0	0	0	1	0	0	0	0	1	0	0	0	0	0	1	0	0	0	1	1	0	0	0	0
Englund 2005	Opinion piece / narrative review	0	Chronic Exertional Compartment Syndrome (CECS)	N/A	CECS is defined as a condition in which increased pressure within a limited space compromises the circulation and function of the contents of that space. Any cause of increased intercompartmental pressure may result in a compartmental syndrome. Or it is defined as reversible ischemia within a closed fibro-osseous space, which leads to decreased tissue perfusion and ischemic pain. CECS is often re…	0			70-80%	1	0	0	0	0	0	0	0	0	0	0	1	0	0	1	0	1	0	0	1	0	0	1	0	0	0	0	0	0	0	0	0	0	1	0	0	0	0	0	0
Dimauro et al, 2005	Case series	2	McArdle syndrome	N/A	McArdle syndrome is a metabolic myopathy causing exercise induced rhabdomyolysis due to deficiency of muscle phosphorylase. It is an autosomal recessive disorder, presenting during childhood with symptoms related to musculoskeletal system.	0					0	0	0	0	0	0	0	0	0	0	1	0	0	1	0	0	0	0	0	0	0	0	0	0	0	0	0	0	0	0	0	0	0	0	0	0	0	0	1
Moeyersoons et al 2005	Opinion piece / narrative review	4	Chronic Exertional Compartment Syndrome (CECS)	N/A	CECS is defined as a condition in which increased pressure within a limited space compromises the circulation and function of the contents of that space. Any cause of increased intercompartmental pressure may result in a compartmental syndrome. Or it is defined as reversible ischemia within a closed fibro-osseous space, which leads to decreased tissue perfusion and ischemic pain. CECS is often re…	0				1	0	0	0	0	0	0	0	0	0	0	1	0	0	1	0	0	0	0	1	0	0	1	0	0	0	0	0	0	0	0	0	0	0	0	0	0	0	0	0
Yates et al, 2004	Cohort study	4	Medial Tibial Stress Syndrome (MTSS)	Pain along the posteromedial border of the tibia that occurs due to exercise excluding pain from ischemic origin or signs of stress fractures	MTSS is defined as symptom complex seen in athletes who complain of exercise induced pain along the posteromedial border of the tibia and recognisable pain is provoked on palpation of this posteromedial tibial border over a length of ≥5 consecutive centimetres.	1					0	0	0	0	0	0	0	0	0	0	1	0	0	0	0	0	0	0	0	0	0	0	1	0	0	0	0	0	0	0	1	0	0	0	0	0	0	0	0
Pell 4th et al 2004	Opinion piece / narrative review	0	Chronic Exertional Compartment Syndrome (CECS)	It is defined as pain, which develops during exercise and which is relieved by rest.	CECS is defined as a condition in which increased pressure within a limited space compromises the circulation and function of the contents of that space. Any cause of increased intercompartmental pressure may result in a compartmental syndrome. Or it is defined as reversible ischemia within a closed fibro-osseous space, which leads to decreased tissue perfusion and ischemic pain. CECS is often re…	0				1	1	1	1	1	0	1	0	0	0	0	1	0	0	0	0	0	0	0	1	0	0	1	0	0	0	0	0	0	0	0	0	0	0	0	0	0	0	0	0
			Medial Tibial Stress Syndrome (MTSS)	N/A	MTSS is defined as symptom complex seen in athletes who complain of exercise induced pain along the posteromedial border of the tibia and recognisable pain is provoked on palpation of this posteromedial tibial border over a length of ≥5 consecutive centimetres.	0	At the distal two thirds of the posteromedial tibial border				0	0	0	0	0	1	0	0	0	0	1	0	0	0	0	0	0	0	1	0	0	0	1	0	0	0	0	0	0	0	1	0	0	0	0	0	0	0	0
			Tibial stress fracture (Tibial SF)	It is defined as a pre-radiologic injury, insufficiency fractures result from reduced bone quality and develop without overload.	Stress fracture is defined as a partial or complete fracture of bone that results from repeated application of stress lower than that required to fracture the bone in a single loading situation.	1					0	0	0	0	0	0	0	0	0	0	1	0	0	0	0	0	0	0	1	0	0	0	0	0	1	1	0	0	0	1	0	0	0	0	0	0	0	0	0
			Popliteal Artery Entrapment Syndrome (PAES)	it's defined as claudication pain which is intermittently present In the leg and is reproducibly elicited by activity.	PAES refers to popliteal artery compression caused by abnormal anatomy of the nearby musculotendinous structures or surrounding muscle hypertrophy, which can cause carious severe complications	1				1	0	0	0	0	0	1	0	0	0	0	1	0	0	0	0	0	0	0	1	0	0	1	0	0	0	0	0	0	0	0	0	0	0	0	0	0	0	0	0
			Superficial Peroneal nerve entrapment (SPNE)	N/A	Nerve entrapment syndrome Is a mechanical compression of the nerve at or near the point where the nerve pierces the fascia to travel within the subcutaneous tissue. Surgical decompression of the mechanical entrapment usually provides relief from pain and paraesthesia.	0					0	0	0	0	0	1	0	0	0	0	1	0	0	0	0	0	0	0	0	0	0	1	0	0	0	0	0	0	0	0	0	0	0	0	0	0	0	0	0
Peris 2003	Opinion piece / narrative review	3	Tibial stress fracture (Tibial SF)	overuse injuries that occur as a result of repeated cyclical loading of the bone.	Stress fracture is defined as a partial or complete fracture of bone that results from repeated application of stress lower than that required to fracture the bone in a single loading situation.	1					0	0	0	0	0	0	0	0	1	0	0	0	1	0	0	1	0	1	1	0	0	0	0	0	1	0	0	0	0	1	0	0	0	0	1	0	0	0	0
Brennan et al, 2003	Opinion piece / narrative review	2	Chronic Exertional Compartment Syndrome (CECS)	N/A	CECS is defined as a condition in which increased pressure within a limited space compromises the circulation and function of the contents of that space. Any cause of increased intercompartmental pressure may result in a compartmental syndrome. Or it is defined as reversible ischemia within a closed fibro-osseous space, which leads to decreased tissue perfusion and ischemic pain. CECS is often re…	0			85-95%	1	0	0	0	0	0	0	0	0	1	0	1	0	0	1	0	0	0	0	1	0	0	1	0	0	0	0	0	0	0	0	0	0	0	0	0	0	0	0	0
Nelson et al, 2002	Opinion piece / narrative review	0	Tibial stress fracture (Tibial SF)	Stress fracture is defined as a partial or complete fracture of bone that results from repeated application of stress lower than that required to fracture the bone in a single loading situation.	Stress fracture is defined as a partial or complete fracture of bone that results from repeated application of stress lower than that required to fracture the bone in a single loading situation.	0					0	0	0	0	0	0	0	0	0	0	1	0	0	0	0	0	0	1	1	0	1	1	0	0	0	0	0	0	0	1	0	0	0	1	0	0	0	0	0
Lauder et al, 2002	Case report	3	Chronic Exertional Compartment Syndrome (CECS)	It is a condition of exercise induced pain associated with increased tissue pressure in the involved muscular compartment.	CECS is defined as a condition in which increased pressure within a limited space compromises the circulation and function of the contents of that space. Any cause of increased intercompartmental pressure may result in a compartmental syndrome. Or it is defined as reversible ischemia within a closed fibro-osseous space, which leads to decreased tissue perfusion and ischemic pain. CECS is often re…	1				1	1	0	0	0	1	0	0	0	0	0	1	0	0	0	0	0	0	0	1	0	0	0	0	0	0	0	0	0	0	0	0	0	0	0	0	0	0	0	0
Couture et al, 2002	Opinion piece / narrative review	0	Tibial stress fracture (Tibial SF)	Stress fractures are common injuries that begin with repetitive and excessive stress on the bone. This leads to the acceleration of normal bone remodelling, the production of microfractures (caused by insufficient time for the bone to repair), the creation of a bone stress injury (i.e., stress reaction), and, eventually, a stress fracture.	Stress fracture is defined as a partial or complete fracture of bone that results from repeated application of stress lower than that required to fracture the bone in a single loading situation.	1					0	0	0	0	0	0	0	0	0	0	0	0	0	0	0	0	0	0	0	0	0	0	0	0	0	0	0	0	0	1	0	0	0	0	1	0	0	0	0
			Medial Tibial Stress Syndrome (MTSS)	It is defined as pain along the posteromedial border of the tibia that occurs due to exercise, which is reproduced by palpation of the posteromedial border of the tibia and is present over a length of five or more consecutive centimetres.	MTSS is defined as symptom complex seen in athletes who complain of exercise induced pain along the posteromedial border of the tibia and recognisable pain is provoked on palpation of this posteromedial tibial border over a length of ≥5 consecutive centimetres.	1					0	0	0	0	0	0	0	0	0	0	0	0	0	0	0	0	0	0	0	0	0	0	0	0	0	0	0	0	0	0	1	0	0	0	0	0	0	0	0
Korkola et al, 2001	Opinion piece / narrative review	3	Chronic Exertional Compartment Syndrome (CECS)	It is defined as pain, which develops during exercise and which is relieved by rest.	CECS is defined as a condition in which increased pressure within a limited space compromises the circulation and function of the contents of that space. Any cause of increased intercompartmental pressure may result in a compartmental syndrome. Or it is defined as reversible ischemia within a closed fibro-osseous space, which leads to decreased tissue perfusion and ischemic pain. CECS is often re…	0				1	1	1	1	1	0	1	0	0	0	0	1	0	0	0	0	0	0	0	1	0	0	1	0	0	0	0	0	0	0	0	0	0	0	0	0	0	0	0	0
			Medial Tibial Stress Syndrome (MTSS)	N/A	MTSS is defined as symptom complex seen in athletes who complain of exercise induced pain along the posteromedial border of the tibia and recognisable pain is provoked on palpation of this posteromedial tibial border over a length of ≥5 consecutive centimetres.	0	at the distal two thirds of the posteromedial tibial border				0	0	0	0	0	1	0	0	0	0	1	0	0	0	0	0	0	0	1	0	0	0	1	0	0	0	0	0	0	0	1	0	0	0	0	0	0	0	0
			Tibial stress fracture (Tibial SF)	It is defined as a pre-radiologic injury, insufficiency fractures result from reduced bone quality and develop without overload.	Stress fracture is defined as a partial or complete fracture of bone that results from repeated application of stress lower than that required to fracture the bone in a single loading situation.	1					0	0	0	0	0	0	0	0	0	0	1	0	0	0	0	0	0	0	1	0	0	0	0	0	1	1	0	0	0	1	0	0	0	0	0	0	0	0	0
			Popliteal Artery Entrapment Syndrome (PAES)	it's defined as claudication pain which is intermittently present In the leg and is reproducibly elicited by activity.	PAES refers to popliteal artery compression caused by abnormal anatomy of the nearby musculotendinous structures or surrounding muscle hypertrophy, which can cause carious severe complications	1				1	0	0	0	0	0	1	0	0	0	0	1	0	0	0	0	0	0	0	1	0	0	1	0	0	0	0	0	0	0	0	0	0	0	0	0	0	0	0	0
			Superficial Peroneal nerve entrapment (SPNE)	N/A	Nerve entrapment syndrome Is a mechanical compression of the nerve at or near the point where the nerve pierces the fascia to travel within the subcutaneous tissue. Surgical decompression of the mechanical entrapment usually provides relief from pain and paraesthesia.	0	lower leg			1	1	1	0	0	0	1	0	1	0	0	1	0	0	0	0	0	0	0	1	0	0	0	0	0	0	1	0	0	0	0	0	0	0	0	0	0	0	0	0
			Radiculopathy/ sciatica	It's Shooting pain down the leg as a result of lumbar intervertebral disc herniation	Radiculopathy describes pain that radiates down the legs and is often described by patients as electric, burning, or sharp. The most common underlying cause of radiculopathy is irritation of a particular nerve, which can occur at any point along the nerve itself and is most often a result of a compressive force.	1					0	0	0	0	0	1	0	0	0	0	0	0	0	0	0	0	0	0	0	0	0	0	0	0	0	0	0	0	0	0	0	0	0	0	0	0	0	0	0
Fabre et al, 2000	Case series	4	Myofascial tears	N/A	It is identified as an injury to the muscle fibres or its attaching tendons.	0					0	0	0	0	0	0	0	0	0	0	1	0	0	0	1	0	0	0	0	0	0	0	0	0	0	0	0	0	0	0	0	0	0	0	0	0	0	0	0
Boden et al, 2000	Opinion piece / narrative review	0	Tibial stress fracture (Tibial SF)	These are overuse injuries commonly seen as a result of repetitive activities or extended duration of training.	Stress fracture is defined as a partial or complete fracture of bone that results from repeated application of stress lower than that required to fracture the bone in a single loading situation.	1					0	0	0	0	0	0	0	0	1	0	0	0	1	0	0	0	0	0	1	0	0	0	1	1	0	0	0	0	0	1	0	0	0	1	0	0	0	0	0
Van der Velde et al, 1999	Case series	3	Tibial stress fracture (Tibial SF)	N/A	Stress fracture is defined as a partial or complete fracture of bone that results from repeated application of stress lower than that required to fracture the bone in a single loading situation.	0	Distal right tibia			0	0	0	0	0	0	1	0	0	1	0	1	0	0	0	0	0	0	0	0	0	0	0	0	0	0	0	0	0	0	0	0	0	0	0	1	0	0	0	0
Touliopolous et al, 1999	Opinion piece / narrative review	3	Chronic Exertional Compartment Syndrome (CECS)	N/A	CECS is defined as a condition in which increased pressure within a limited space compromises the circulation and function of the contents of that space. Any cause of increased intercompartmental pressure may result in a compartmental syndrome. Or it is defined as reversible ischemia within a closed fibro-osseous space, which leads to decreased tissue perfusion and ischemic pain. CECS is often re…	0	More common at the anterior and lateral compartments		70-80%	1	1	1	1	1	0	0	0	0	0	0	1	0	0	0	0	0	0	0	1	0	0	1	0	0	0	0	0	0	0	0	0	0	1	0	0	0	0	0	0
			Tibial stress fracture (Tibial SF)	N/A	Stress fracture is defined as a partial or complete fracture of bone that results from repeated application of stress lower than that required to fracture the bone in a single loading situation.	0	More common at the posteromedial tibia				1	0	0	0	0	0	0	0	0	0	1	0	0	1	0	1	0	0	0	0	0	0	0	0	0	0	0	0	0	1	0	0	0	0	0	0	0	0	0
			Medial Tibial Stress Syndrome (MTSS)	N/A	MTSS is defined as symptom complex seen in athletes who complain of exercise induced pain along the posteromedial border of the tibia and recognisable pain is provoked on palpation of this posteromedial tibial border over a length of ≥5 consecutive centimetres.	0					0	0	0	0	0	0	0	0	0	0	1	0	0	1	0	0	0	0	1	0	0	0	1	0	0	0	0	0	0	0	1	0	0	0	0	0	0	0	0
Stager et al, 1999	Opinion piece / narrative review	0	Popliteal Artery Entrapment Syndrome (PAES)	PAES refers to popliteal artery compression caused by abnormal anatomy of the nearby musculotendinous structures or surrounding muscle hypertrophy, which can cause carious severe complications	PAES refers to popliteal artery compression caused by abnormal anatomy of the nearby musculotendinous structures or surrounding muscle hypertrophy, which can cause carious severe complications	1			0.25	1	0	0	0	0	0	0	0	0	0	0	1	0	0	1	0	0	0	0	0	0	0	0	0	0	0	0	0	0	0	0	0	0	0	0	0	0	0	0	0
Palaniappan et al, 1999	Opinion piece / narrative review	2	Accessory low lying soleus muscle (ALLSM) (ASM)	N/A	Accessory low lying soleus muscle (ALLSM) (ASM) is a rare supernumerary anatomical variant that commonly presents as a posteromedial ankle swelling, which may become painful during physical activity. As it may mimic a soft tissue tumour, it is essential to differentiate this condition from ganglion, lipoma, haemangioma, synovium, and sarcoma. However, ASM may also present with a painful syndrome,…	0					0	0	0	0	0	0	0	0	0	0	0	0	0	0	1	0	0	0	0	0	0	0	0	0	0	0	0	0	0	0	0	0	0	0	0	0	0	0	0
Bryan et al, 1999	Case report	4	Myofascial tears	N/A	It is identified as an injury to the muscle fibres or its attaching tendons.	0					0	0	0	0	0	0	0	0	0	0	0	1	0	0	1	0	0	0	0	0	0	0	0	0	0	0	0	0	0	0	0	0	0	0	0	0	0	0	0
Padhiar et al, 1997	Opinion piece / narrative review	3	Chronic Exertional Compartment Syndrome (CECS)	N/A	CECS is defined as a condition in which increased pressure within a limited space compromises the circulation and function of the contents of that space. Any cause of increased intercompartmental pressure may result in a compartmental syndrome. Or it is defined as reversible ischemia within a closed fibro-osseous space, which leads to decreased tissue perfusion and ischemic pain. CECS is often re…	0				0	0	0	0	0	0	0	0	0	0	0	1	0	0	0	0	0	0	0	0	0	0	0	0	0	0	0	0	0	0	0	0	0	0	0	0	0	0	0	0
Bruckner et al, 1997	Opinion piece / narrative review	0	Tibial stress fracture (Tibial SF)	N/A	Stress fracture is defined as a partial or complete fracture of bone that results from repeated application of stress lower than that required to fracture the bone in a single loading situation.	0					0	0	0	0	0	0	0	0	0	0	1	0	1	0	0	0	0	0	1	0	0	0	0	0	1	0	0	0	1	1	0	0	0	0	0	0	0	0	0
Brodie et al, 1997	Case report	2	Accessory low lying soleus muscle (ALLSM) (ASM)	Accessory low lying soleus muscle (ALLSM) (ASM) is a rare supernumerary anatomical variant that commonly presents as a posteromedial ankle swelling, which may become painful during physical activity. As it may mimic a soft tissue tumour, it is essential to differentiate this condition from ganglion, lipoma, haemangioma, synovium, and sarcoma. However, ASM may also present with a painful syndrome,…	Accessory low lying soleus muscle (ALLSM) (ASM) is a rare supernumerary anatomical variant that commonly presents as a posteromedial ankle swelling, which may become painful during physical activity. As it may mimic a soft tissue tumour, it is essential to differentiate this condition from ganglion, lipoma, haemangioma, synovium, and sarcoma. However, ASM may also present with a painful syndrome,…	1				0	0	0	0	0	0	0	0	0	0	0	1	0	0	0	0	0	0	0	0	0	0	0	0	0	0	0	1	0	0	0	0	0	0	0	0	0	0	0	0
Schepsis et al, 1996	Opinion piece / narrative review	3	Chronic Exertional Compartment Syndrome (CECS)	N/A	CECS is defined as a condition in which increased pressure within a limited space compromises the circulation and function of the contents of that space. Any cause of increased intercompartmental pressure may result in a compartmental syndrome. Or it is defined as reversible ischemia within a closed fibro-osseous space, which leads to decreased tissue perfusion and ischemic pain. CECS is often re…	0					1	0	0	0	0	0	0	0	0	0	1	0	0	1	0	0	0	0	1	0	0	1	0	0	0	0	0	0	0	0	0	0	0	0	0	0	0	0	0
Ross 1996	Opinion piece / narrative review	0	Chronic Exertional Compartment Syndrome (CECS)	N/A	CECS is defined as a condition in which increased pressure within a limited space compromises the circulation and function of the contents of that space. Any cause of increased intercompartmental pressure may result in a compartmental syndrome. Or it is defined as reversible ischemia within a closed fibro-osseous space, which leads to decreased tissue perfusion and ischemic pain. CECS is often re…	1			0.8	1	0	0	0	0	0	0	0	0	0	0	1	0	0	0	0	0	0	0	1	0	0	1	0	0	0	0	0	0	0	0	0	0	0	0	0	0	0	0	0
Hutchinsom et al, 1994	Opinion piece / narrative review	2	Chronic Exertional Compartment Syndrome (CECS)	It is a condition in which increased pressure within a limited space compromises the circulation and function of tissues within that space	CECS is defined as a condition in which increased pressure within a limited space compromises the circulation and function of the contents of that space. Any cause of increased intercompartmental pressure may result in a compartmental syndrome. Or it is defined as reversible ischemia within a closed fibro-osseous space, which leads to decreased tissue perfusion and ischemic pain. CECS is often re…	1					0	0	0	0	0	0	0	0	0	0	1	0	0	0	0	1	0	0	0	0	1	0	0	0	0	0	0	0	0	0	0	0	0	0	0	0	0	0	0
Moeyersoons et al, 1992	Narrative review	4	Chronic Exertional Compartment Syndrome (CECS)	N/a	CECS is defined as a condition in which increased pressure within a limited space compromises the circulation and function of the contents of that space. Any cause of increased intercompartmental pressure may result in a compartmental syndrome. Or it is defined as reversible ischemia within a closed fibro-osseous space, which leads to decreased tissue perfusion and ischemic pain. CECS is often re…	0					0	0	0	0	0	0	0	0	0	0	1	0	0	0	0	1	0	0	0	0	1	0	0	0	0	0	0	0	0	0	0	0	0	0	0	0	0	0	0
Clayer et al, 1992	Case series	4	Tibial stress fracture (Tibial SF)	N/A	Stress fracture is defined as a partial or complete fracture of bone that results from repeated application of stress lower than that required to fracture the bone in a single loading situation.	0				1	0	0	0	0	0	1	0	0	1	0	0	0	0	0	1	0	0	0	0	1	0	0	0	0	0	0	0	1	1	0	0	0	0	0	0	0	0	0	0
Ha et al, 1991	Case series	4	Tibial stress fracture (Tibial SF)	N/A	Stress fracture is defined as a partial or complete fracture of bone that results from repeated application of stress lower than that required to fracture the bone in a single loading situation.	0	Medial border of the tibia				1	0	0	0	0	0	0	0	0	0	1	0	0	0	0	0	0	0	0	0	0	0	0	0	0	0	0	0	0	1	0	0	0	1	1	0	0	0	0
Pedowitz et al, 1990	Retrospective case series	4	Chronic Exertional Compartment Syndrome (CECS)	N/A	CECS is defined as a condition in which increased pressure within a limited space compromises the circulation and function of the contents of that space. Any cause of increased intercompartmental pressure may result in a compartmental syndrome. Or it is defined as reversible ischemia within a closed fibro-osseous space, which leads to decreased tissue perfusion and ischemic pain. CECS is often re…	0					0	0	0	0	0	0	0	0	0	0	0	0	0	0	0	0	0	0	0	0	0	0	0	0	0	0	0	0	0	0	0	0	0	0	0	0	0	0	0
Grimley et al, 1990	Case report	3	Popliteal Artery Entrapment Syndrome (PAES)	It is an uncommon vascular disorder characterised by an abnormal relationship between the popliteal artery and the soft tissue of the popliteal fossa.	PAES refers to popliteal artery compression caused by abnormal anatomy of the nearby musculotendinous structures or surrounding muscle hypertrophy, which can cause carious severe complications	1				1	0	0	1	1	0	1	0	0	0	0	1	0	0	0	0	0	0	0	1	0	0	0	0	0	0	0	0	0	0	0	0	0	0	0	0	0	0	0	0
Styf 1989	Opinion piece / narrative review	0	Chronic Exertional Compartment Syndrome (CECS)	it is a condition in which increased intramuscular pressure during exercise impedes blood flow and the function of the tissues within the compartment.	CECS is defined as a condition in which increased pressure within a limited space compromises the circulation and function of the contents of that space. Any cause of increased intercompartmental pressure may result in a compartmental syndrome. Or it is defined as reversible ischemia within a closed fibro-osseous space, which leads to decreased tissue perfusion and ischemic pain. CECS is often re…	1				1	1	1	1	1	0	0	0	0	0	0	1	0	0	0	0	0	0	0	1	0	1	1	0	0	0	0	0	0	0	0	0	0	1	0	0	0	0	0	0
			Superficial Peroneal nerve entrapment (SPNE)	N/A	Superficial peroneal nerve syndrome is an entrapment neuropathy that results from mechanical compression of the nerve at or near the point where the nerve pierces the fascia to travel within the subcutaneous tissue. Surgical decom- pression of the mechanical entrapment usually provides relief from pain and paraesthesia.	0					0	0	0	0	0	0	0	0	0	0	1	0	1	0	0	0	0	0	0	0	0	0	0	0	0	0	0	0	0	0	0	0	0	0	0	0	0	0	0
Leach et al, 1989	Case series	4	Superficial Peroneal nerve entrapment (SPNE)	N/A	Superficial peroneal nerve syndrome is an entrapment neuropathy that results from mechanical compression of the nerve at or near the point where the nerve pierces the fascia to travel within the subcutaneous tissue. Surgical decom- pression of the mechanical entrapment usually provides relief from pain and paraesthesia.	0					0	0	0	0	0	0	0	0	0	0	1	0	0	1	0	0	0	0	1	0	0	0	0	0	0	0	0	1	0	0	0	0	1	0	0	0	0	0	1
Styf 1988	Case series	4	Chronic Exertional Compartment Syndrome (CECS)	N/A	CECS is defined as a condition in which increased pressure within a limited space compromises the circulation and function of the contents of that space. Any cause of increased intercompartmental pressure may result in a compartmental syndrome. Or it is defined as reversible ischemia within a closed fibro-osseous space, which leads to decreased tissue perfusion and ischemic pain. CECS is often re…	0					0	0	0	0	0	0	0	0	0	0	0	0	0	0	0	0	0	0	0	0	0	0	0	0	0	0	0	0	0	0	0	0	0	0	0	0	0	0	0
			Medial Tibial Stress Syndrome (MTSS)		MTSS is defined as symptom complex seen in athletes who complain of exercise induced pain along the posteromedial border of the tibia and recognisable pain is provoked on palpation of this posteromedial tibial border over a length of ≥5 consecutive centimetres.						0	0	0	0	0	0	0	0	0	0	0	0	0	0	0	0	0	0	0	0	0	0	0	0	0	0	0	0	0	0	1	0	0	0	0	0	0	0	0
			Superficial Peroneal nerve entrapment (SPNE)		Superficial peroneal nerve syndrome is an entrapment neuropathy that results from mechanical compression of the nerve at or near the point where the nerve pierces the fascia to travel within the subcutaneous tissue. Surgical decom- pression of the mechanical entrapment usually provides relief from pain and paraesthesia.						0	0	0	0	0	0	0	0	0	0	0	0	0	0	0	0	0	0	0	0	0	0	0	0	0	0	0	0	0	0	0	0	0	0	0	0	0	0	0
Allen 1988	Case report	3	Tibial stress fracture (Tibial SF)	N/A	Stress fracture is defined as a partial or complete fracture of bone that results from repeated application of stress lower than that required to fracture the bone in a single loading situation.	0				1	0	0	0	0	1	0	0	0	1	0	0	0	0	0	0	0	0	0	1	0	0	0	0	0	0	0	0	0	0	0	0	0	0	2	0	0	0	0	0
Styf et al, 1987	Case series	4	Chronic Exertional Compartment Syndrome (CECS)	N/A	CECS is defined as a condition in which increased pressure within a limited space compromises the circulation and function of the contents of that space. Any cause of increased intercompartmental pressure may result in a compartmental syndrome. Or it is defined as reversible ischemia within a closed fibro-osseous space, which leads to decreased tissue perfusion and ischemic pain. CECS is often re…	0					0	0	0	0	0	0	0	0	0	0	1	0	0	0	0	0	0	0	1	0	0	1	0	0	0	0	0	0	0	0	0	0	0	0	0	0	0	0	0
Fronek et al, 1987	Case series	3	Chronic Exertional Compartment Syndrome (CECS)	N/A	CECS is defined as a condition in which increased pressure within a limited space compromises the circulation and function of the contents of that space. Any cause of increased intercompartmental pressure may result in a compartmental syndrome. Or it is defined as reversible ischemia within a closed fibro-osseous space, which leads to decreased tissue perfusion and ischemic pain. CECS is often re…	0					0	0	0	0	0	0	0	0	0	0	1	0	0	0	0	0	0	0	1	0	0	1	0	0	0	0	0	0	0	0	0	0	0	0	0	0	0	0	0
Romanus et al. 1986	Case report	3	Accessory low lying soleus muscle (ALLSM) (ASM)	N/A	Accessory low lying soleus muscle (ALLSM) (ASM) is a rare supernumerary anatomical variant that commonly presents as a posteromedial ankle swelling, which may become painful during physical activity. As it may mimic a soft tissue tumour, it is essential to differentiate this condition from ganglion, lipoma, haemangioma, synovium, and sarcoma. However, ASM may also present with a painful syndrome,…	0				1	0	0	1	1	0	0	0	0	1	0	1	0	0	1	0	0	0	0	0	0	0	0	0	0	0	0	0	0	0	1	0	0	0	1	0	1	0	0	0
Detmer 1986	Opinion piece / narrative review	0	Tibial stress fracture (Tibial SF)	N/A	Stress fracture is defined as a partial or complete fracture of bone that results from repeated application of stress lower than that required to fracture the bone in a single loading situation.	0	more common at the posteromedial tibia				1	0	0	0	0	0	0	0	0	0	1	0	0	1	0	1	0	0	0	0	0	0	0	0	0	0	0	0	0	1	0	0	0	0	0	0	0	0	0
			Medial Tibial Stress Syndrome (MTSS)	N/A	MTSS is defined as symptom complex seen in athletes who complain of exercise induced pain along the posteromedial border of the tibia and recognisable pain is provoked on palpation of this posteromedial tibial border over a length of ≥5 consecutive centimetres.	0					0	0	0	0	0	0	0	0	0	0	1	0	0	1	0	0	0	0	1	0	0	0	1	0	0	0	0	0	0	0	1	0	0	0	0	0	0	0	0
McAuliffe et al, 1985	Case report	3	Superficial Peroneal nerve entrapment (SPNE)	N/A	Superficial peroneal nerve syndrome is an entrapment neuropathy that results from mechanical compression of the nerve at or near the point where the nerve pierces the fascia to travel within the subcutaneous tissue. Surgical decom- pression of the mechanical entrapment usually provides relief from pain and paraesthesia.	0				1	0	0	0	0	0	1	0	0	0	0	1	0	0	0	0	0	0	0	0	0	0	0	0	0	0	0	0	0	0	0	0	0	0	0	0	0	0	0	0
Detmer et al, 1985	Case series	2	Chronic Exertional Compartment Syndrome (CECS)	It is a condition in which increased pressure within a limited space compromises the circulation and function of tissues within that space	CECS is defined as a condition in which increased pressure within a limited space compromises the circulation and function of the contents of that space. Any cause of increased intercompartmental pressure may result in a compartmental syndrome. Or it is defined as reversible ischemia within a closed fibro-osseous space, which leads to decreased tissue perfusion and ischemic pain. CECS is often re…	1					0	0	0	0	0	0	0	0	0	0	1	0	0	0	0	1	0	0	0	0	1	0	0	0	0	0	0	0	0	0	0	0	0	0	0	0	0	0	0
Bell 1985	Case report	2	Popliteal Artery Entrapment Syndrome (PAES)	N/A	PAES refers to popliteal artery compression caused by abnormal anatomy of the nearby musculotendinous structures or surrounding muscle hypertrophy, which can cause carious severe complications	0					0	0	0	0	0	0	0	0	0	0	1	0	0	0	0	0	0	0	0	0	1	0	0	0	0	0	0	0	0	0	0	0	0	0	0	0	0	0	0
Wallensten et al, 1984	Case control study	3	Chronic Exertional Compartment Syndrome (CECS)	N/A	CECS is defined as a condition in which increased pressure within a limited space compromises the circulation and function of the contents of that space. Any cause of increased intercompartmental pressure may result in a compartmental syndrome. Or it is defined as reversible ischemia within a closed fibro-osseous space, which leads to decreased tissue perfusion and ischemic pain. CECS is often re…	0					0	0	0	0	0	0	0	0	0	0	1	0	0	0	0	1	0	0	0	0	1	0	0	0	0	0	0	0	0	0	0	0	0	0	0	0	0	0	0
Orava et al, 1984	Case series	4	Tibial stress fracture (Tibial SF)	N/A	Stress fracture is defined as a partial or complete fracture of bone that results from repeated application of stress lower than that required to fracture the bone in a single loading situation.	0	Medial border of the tibia				1	0	0	0	0	0	0	0	0	0	1	0	0	0	0	0	0	0	0	0	0	0	0	0	0	0	0	0	0	1	0	0	0	1	1	0	0	0	0
Mubarak et al, 1982	Case series	3	Medial Tibial Stress Syndrome (MTSS)	Pain along the posteromedial border of the tibia that occurs due to exercise excluding pain from ischemic origin or signs of stress fractures	MTSS is defined as symptom complex seen in athletes who complain of exercise induced pain along the posteromedial border of the tibia and recognisable pain is provoked on palpation of this posteromedial tibial border over a length of ≥5 consecutive centimetres.	1					0	0	0	0	0	0	0	0	0	0	1	0	0	0	0	0	0	0	0	0	0	0	1	0	0	0	0	0	0	0	1	0	0	0	0	0	0	0	0
Veith et al, 1980	Case control study	3	Chronic Exertional Compartment Syndrome (CECS)	N/A	CECS is defined as a condition in which increased pressure within a limited space compromises the circulation and function of the contents of that space. Any cause of increased intercompartmental pressure may result in a compartmental syndrome. Or it is defined as reversible ischemia within a closed fibro-osseous space, which leads to decreased tissue perfusion and ischemic pain. CECS is often re…	0					0	0	0	0	0	0	0	0	0	0	1	0	0	0	0	0	0	0	1	0	0	1	0	0	0	0	0	0	0	0	0	0	0	0	0	0	0	0	0
McDonald et al, 1980	Case report	4	Popliteal Artery Entrapment Syndrome (PAES)	N/A	PAES refers to popliteal artery compression caused by abnormal anatomy of the nearby musculotendinous structures or surrounding muscle hypertrophy, which can cause carious severe complications	0					0	0	0	0	0	0	0	0	0	0	1	0	0	0	0	0	0	0	0	0	1	0	0	0	0	0	0	0	0	0	0	0	0	0	0	0	0	0	0
Reneman 1975	Opinion piece / narrative review	2	Chronic Exertional Compartment Syndrome (CECS)	N/A	CECS is defined as a condition in which increased pressure within a limited space compromises the circulation and function of the contents of that space. Any cause of increased intercompartmental pressure may result in a compartmental syndrome. Or it is defined as reversible ischemia within a closed fibro-osseous space, which leads to decreased tissue perfusion and ischemic pain. CECS is often re…	0				1	1	0	0	0	0	1	0	0	0	0	1	0	0	0	0	0	0	0	1	0	0	1	0	0	0	0	0	0	0	0	0	0	0	0	0	0	0	0	0
Puranen 1974	Case series	3	Medial Tibial Stress Syndrome (MTSS)	MTSS as a pain and discomfort in the lower region of the leg resulting from repetitive activity on hard surfaces, or due to forcible, excessive use of the foot flexors, the diagnosis should be limited to musculoskeletal inflammation, excluding stress fractures or ischemic disorders	MTSS is defined as symptom complex seen in athletes who complain of exercise induced pain along the posteromedial border of the tibia and recognisable pain is provoked on palpation of this posteromedial tibial border over a length of ≥5 consecutive centimetres.	1				1	0	0	0	0	0	1	0	0	0	0	0	0	0	0	1	0	0	0	1	0	0	0	1	0	0	0	0	0	0	0	1	0	0	0	0	0	0	0	0
Clement 1974	Case series	0	Medial Tibial Stress Syndrome (MTSS)	N/A	MTSS is defined as symptom complex seen in athletes who complain of exercise induced pain along the posteromedial border of the tibia and recognisable pain is provoked on palpation of this posteromedial tibial border over a length of ≥5 consecutive centimetres.	0	At the distal two thirds of the posteromedial tibial border				0	0	0	0	0	1	0	0	0	0	1	0	0	0	0	0	0	0	1	0	0	0	1	0	0	0	0	0	0	0	1	0	0	0	0	0	0	0	0
Leach et al, 1964	Opinion piece / narrative review	0	Chronic Exertional Compartment Syndrome (CECS)	N/A	CECS is defined as a condition in which increased pressure within a limited space compromises the circulation and function of the contents of that space. Any cause of increased intercompartmental pressure may result in a compartmental syndrome. Or it is defined as reversible ischemia within a closed fibro-osseous space, which leads to decreased tissue perfusion and ischemic pain. CECS is often re…	0			0.8	1	0	0	0	0	0	0	0	0	0	0	0	0	0	1	0	0	0	0	1	0	0	1	0	0	0	0	0	0	0	0	0	0	1	0	0	0	0	0	0
[truncated: 237 more columns]

## Sheet: Sheet 2
Conditions	CONDITIONS TYPES	Definition	Study design
Chronic Exertional Compartment Syndrome (CECS)	ant-CECS	CECS is defined as a condition in which increased pressure within a limited space compromises the circulation and function of the contents of that space. Any cause of increased intercompartmental pressure may result in a compartmental syndrome. Or it is defined as reversible ischemia within a closed fibro-osseous space, which leads to decreased tissue perfusion and ischemic pain. CECS is often re…	Systematic review
Medial Tibial Stress Syndrome (MTSS)	lat-CECS	MTSS is defined as symptom complex seen in athletes who complain of exercise induced pain along the posteromedial border of the tibia and recognisable pain is provoked on palpation of this posteromedial tibial border over a length of ≥5 consecutive centimetres.	Opinion piece / narrative review
Tibial stress fracture (Tibial SF)	sp-CECS	Stress fracture is defined as a partial or complete fracture of bone that results from repeated application of stress lower than that required to fracture the bone in a single loading situation.	Case study
Superficial Peroneal nerve entrapment (SPNE)	dp-CECS	Superficial peroneal nerve syndrome is an entrapment neuropathy that results from mechanical compression of the nerve at or near the point where the nerve pierces the fascia to travel within the subcutaneous tissue. Surgical decom- pression of the mechanical entrapment usually provides relief from pain and paraesthesia.	Cohort study
Myofascial tears	Chronic exertional compartment syndrome (in general)	The sural nerve entrapment is a compression on the nerve due to fascial thickening, while the symptomatology includes sensory alterations and deficits at the nerve distribution area.	RCT
Radiculopathy/ sciatica	PAES in general	Radiculopathy describes pain that radiates down the legs and is often described by patients as electric, burning, or sharp. The most common underlying cause of radiculopathy is irritation of a particular nerve, which can occur at any point along the nerve itself and is most often a result of a compressive force.	Non-RCT
Saphenous entrapment syndrome	Anatomic PAES (Type 1-5)	PAES refers to popliteal artery compression caused by abnormal anatomy of the nearby musculotendinous structures or surrounding muscle hypertrophy, which can cause carious severe complications	Cross-sectional study
Soleal sling syndrome	Functional PAES (Type 6)	Soleal sling syndrome is a compression of the tibial nerve as it passes under the soleal sling ("Soleal Sling Syndrome")	Survey
Popliteal Artery Entrapment Syndrome (PAES)	Medial Tibial stress fracture (Tibial SF)	Nerve entrapment syndrome Is a mechanical compression of the nerve at or near the point where the nerve pierces the fascia to travel within the subcutaneous tissue. Surgical decompression of the mechanical entrapment usually provides relief from pain and paraesthesia.	Case report
Functional Popliteal Artery Entrapment Syndrome (FPAES)	Anterior Tibial stress fracture (Tibial SF)	Accessory low lying soleus muscle (ALLSM) (ASM) is a rare supernumerary anatomical variant that commonly presents as a posteromedial ankle swelling, which may become painful during physical activity. As it may mimic a soft tissue tumour, it is essential to differentiate this condition from ganglion, lipoma, haemangioma, synovium, and sarcoma. However, ASM may also present with a painful syndrome,…	Case series
fibular stress fracture		McArdle syndrome is a metabolic myopathy causing exercise induced rhabdomyolysis due to deficiency of muscle phosphorylase. It is an autosomal recessive disorder, presenting during childhood with symptoms related to musculoskeletal system.	Narrative review
McArdle syndrome		It is identified as an injury to the muscle fibres or its attaching tendons.	Non systematic review
Accessory low lying soleus muscle (ALLSM)			Retrospective case series
Nerve Entrapment Syndrome			Case control study
Tibial nerve entrapment
Common Peroneal nerve entrapment
Sural nerve entrapment syndrome

## Sheet: Sheet 3
Condition	History 0= Medical history of other pathologies 1= No medical history 2= No cardiac history 3= Bilateral decompression for CECS 4= No taruma history 5= History of fainting once 6= Exertional pain 7= Non-exertional pain 8= Pain during rest 9= Pain relieved by rest 10= Direct/ indirect trauma onset 11= Gradual (insidious) onset of pain 12= sudden onset of pain 13= The pain get worse with activity o…																																			Symptoms 0= Dull aching pain in the lower leg 1= Sharp pain in the lower leg 2= Shooting/ electrical pain 3= Radiating pain 4= LBP 5= Restless leg 6= Dysphasia 7= Paraesthesia 8= Numbness 9= Pins & needles 10= Tingling 11= Burning 12= Weakness 13= Sensory loss 14= Altered sensation 15= Skin coolness 16= Rub or skin hotness 17= Tightness/ sense of fullness/ tense 18= Cramps/cramping 19= Muscle str…
	0	1	2	3	4	5	6	7	8	9	10	11	12	13	14	15	16	17	18	19	20	21	22	23	24	25	26	27	28	29	30	31	32	33	34	0	1	2	3	4	5	6	7	8	9	10	11	12	13
Popliteal Artery Entrapment Syndrome (PAES)	0	1	1	0	0	0	1	0	0	0	0	0	0	0	0	0	0	0	0	0	0	0	0	0	0	0	0	0	0	0	0	0	0	0	0	0	0	0	0	0	0	0	1	0	0	0	0	0	0
Chronic Exertional Compartment Syndrome (CECS)	0	0	0	0	0	0	1	0	0	0	0	0	0	0	1	0	0	1	0	0	0	0	0	0	0	0	0	0	0	0	0	0	0	0	0	0	0	0	0	0	0	0	1	0	0	0	0	0	0
Tibial stress fracture (Tibial SF)	0	0	0	0	0	0	1	0	0	0	0	0	1	0	0	0	0	0	0	0	0	0	0	0	0	1	0	0	0	0	0	0	0	0	0	1	0	0	0	0	0	0	0	0	0	0	0	0	0
Popliteal Artery Entrapment Syndrome (PAES)	0	1	0	0	0	0	1	0	0	0	0	0	1	0	0	0	0	0	0	0	0	0	0	0	0	0	0	0	0	0	0	0	0	0	0	0	0	0	0	0	0	0	1	0	0	0	0	1	0
Chronic Exertional Compartment Syndrome (CECS)	0	1	0	0	0	0	1	0	0	0	0	0	0	0	1	0	0	0	0	0	0	0	0	0	0	0	0	0	0	0	0	0	0	0	0	1	0	0	0	0	0	0	0	0	0	0	0	0	0
Medial Tibial Stress Syndrome (MTSS)	0	1	0	0	0	0	1	0	0	0	0	0	0	0	1	0	0	0	1	0	0	0	0	0	0	0	1	0	0	0	1	0	0	0	0	1	0	0	0	0	0	0	0	0	0	0	0	0	0
Soleal sling syndrome	0	1	0	0	0	0	0	0	0	0	0	0	0	0	0	0	0	0	0	0	0	0	0	0	0	0	0	0	0	0	0	0	0	0	0	1	0	0	0	0	0	0	0	1	0	0	0	0	1
Radiculopathy/ sciatica	0	1	0	0	0	0	0	0	0	0	0	0	0	0	0	0	0	0	0	0	0	0	0	0	0	0	0	0	0	0	0	0	0	0	0	0	1	1	1	1	0	0	0	0	0	0	0	0	0
Tibial stress fracture (Tibial SF)	0	1	0	0	0	0	1	0	1	0	0	0	0	0	1	0	0	0	0	0	1	0	0	0	0	1	0	0	0	0	0	0	0	0	0	1	0	0	0	0	0	0	0	0	0	1	0	0	0
Chronic Exertional Compartment Syndrome (CECS)	0	1	9	0	0	0	1	0	0	0	0	0	0	0	1	0	0	1	0	0	0	0	0	0	0	0	0	0	0	0	0	0	0	0	0	1	0	0	0	0	0	0	0	0	0	0	0	0	0
Radiculopathy/ sciatica	0	1	0	0	0	0	0	0	1	0	0	0	0	0	0	0	0	0	0	0	0	0	0	0	0	0	0	0	0	0	0	0	0	0	0	0	1	1	0	1	0	0	1	1	0	1	0	1	1
Popliteal Artery Entrapment Syndrome (PAES)	0	1	1	0	0	0	1	0	0	0	0	0	0	0	0	0	0	0	0	0	0	0	0	0	0	0	0	0	0	0	0	0	0	0	0	1	0	0	0	0	0	0	0	0	0	0	0	0	0
Medial Tibial Stress Syndrome (MTSS)	0	1	0	0	0	0	1	0	0	0	0	0	0	0	1	0	0	1	0	0	0	0	0	0	0	0	1	0	0	0	0	0	0	0	0	1	0	0	0	0	0	0	0	0	0	0	1	0	0
Chronic Exertional Compartment Syndrome (CECS)	0	1	0	0	0	0	1	0	0	0	0	0	0	0	1	0	0	1	0	0	0	0	0	0	0	0	0	0	0	0	0	0	0	0	0	1	0	0	0	0	1	0	0	0	0	0	0	0	0
Chronic Exertional Compartment Syndrome (CECS)	0	1	0	0	0	0	1	0	0	0	0	0	0	0	1	0	0	1	0	0	0	0	0	0	0	0	0	0	0	0	0	0	0	0	0	1	0	0	0	0	0	0	1	0	0	0	0	1	0
Superficial Peroneal nerve entrapment (SPNE)	0	1	0	1	0	0	1	0	0	0	0	0	0	0	1	0	0	0	0	0	0	1	0	0	0	0	0	0	0	0	0	0	0	0	0	1	0	0	0	0	0	0	0	1	0	1	0	0	0
Tibial nerve entrapment	0	1	0	0	0	0	1	0	1	0	0	0	0	0	0	0	0	0	0	0	1	0	0	0	0	0	0	0	0	0	0	0	0	0	0	1	0	0	0	0	0	0	0	1	0	1	0	0	0
Superficial Peroneal nerve entrapment (SPNE)	0	1	0	0	0	0	0	0	1	0	1	0	0	0	1	0	0	0	0	0	1	1	0	0	0	0	0	0	0	0	0	0	0	0	0	0	0	0	0	0	0	0	0	0	0	0	0	0	0
Popliteal Artery Entrapment Syndrome (PAES)	0	1	0	0	0	0	1	0	1	0	0	0	0	0	1	0	0	1	0	0	0	0	0	0	0	0	0	0	0	0	0	0	0	0	0	1	0	0	0	1	0	0	1	0	0	0	0	0	0
Myofascial tears	0	0	0	0	0	0	0	1	1	0	1	0	0	0	0	0	0	0	0	0	0	0	0	0	0	0	0	0	0	0	0	0	0	0	0	0	1	0	0	0	0	0	0	0	0	0	0	1	0
Chronic Exertional Compartment Syndrome (CECS)	2	1	0	0	0	0	1	0	0	0	0	0	0	0	1	0	0	1	0	0	0	0	1	0	0	0	0	0	0	0	0	0	0	0	0	1	0	0	0	0	0	0	1	0	0	0	1	1	1
Chronic Exertional Compartment Syndrome (CECS)	0	1	0	0	0	0	0	0	0	0	0	0	0	0	1	0	0	1	0	0	0	0	0	0	0	0	0	0	0	0	0	0	0	0	0	1	0	0	0	0	0	0	0	0	0	0	0	0	0
Chronic Exertional Compartment Syndrome (CECS)	0	1	0	0	0	0	1	0	0	0	0	0	0	0	1	0	0	1	0	0	0	0	0	0	0	0	0	0	0	0	0	0	0	0	0	1	0	0	0	0	0	0	0	0	0	0	0	1	0
Chronic Exertional Compartment Syndrome (CECS)	0	0	0	0	0	0	0	0	0	0	0	0	0	0	0	0	0	0	0	0	0	0	0	0	0	0	0	0	0	0	0	0	0	0	0	0	0	0	0	0	0	0	0	0	0	0	0	0	0
Chronic Exertional Compartment Syndrome (CECS)	0	0	0	0	0	0	0	0	0	0	0	0	0	0	0	0	0	0	0	0	0	0	0	0	0	0	0	0	0	0	0	0	0	0	0	0	0	0	0	0	0	0	0	0	0	0	0	0	0
Chronic Exertional Compartment Syndrome (CECS)	0	0	0	0	0	0	0	0	0	0	0	0	0	0	0	0	0	0	0	0	0	0	0	0	0	0	0	0	0	0	0	0	0	0	0	0	0	0	0	0	0	0	0	0	0	0	0	0	0
Chronic Exertional Compartment Syndrome (CECS)	0	1	0	0	0	0	1	0	0	0	0	0	0	0	1	0	0	1	0	0	0	0	0	0	0	0	0	0	0	0	0	0	0	0	0	1	0	0	0	0	0	0	1	1	0	0	0	1	0
Radiculopathy/ sciatica	0	1	0	0	0	0	0	1	1	0	0	0	0	0	0	0	0	0	0	0	0	0	0	0	0	0	0	0	0	0	0	0	0	0	0	0	1	1	1	1	0	0	1	1	0	0	0	1	1
Chronic Exertional Compartment Syndrome (CECS)	0	1	0	0	0	0	1	0	0	0	0	0	0	0	1	0	0	1	0	0	0	0	0	0	0	0	0	0	0	0	0	0	0	0	0	1	0	0	0	0	0	0	0	0	0	0	0	1	0
Medial Tibial Stress Syndrome (MTSS)	0	1	0	0	0	0	1	0	0	0	0	0	0	0	1	0	0	0	1	0	0	0	0	0	0	0	1	0	0	0	0	0	0	0	0	1	0	0	0	0	0	0	0	0	0	0	0	0	0
Tibial stress fracture (Tibial SF)	0	0	0	0	0	0	1	0	0	0	0	0	0	0	1	0	0	0	0	0	1	1	0	0	0	1	0	0	0	0	0	0	0	0	0	1	0	0	0	0	0	0	0	0	0	0	0	0	0
Popliteal Artery Entrapment Syndrome (PAES)	0	1	0	0	0	0	1	0	0	0	0	0	0	0	1	0	0	1	0	0	0	0	0	0	0	0	0	0	0	0	0	0	0	0	0	1	0	0	1	0	1	0	0	1	0	0	0	0	0
Superficial Peroneal nerve entrapment (SPNE)	0	1	0	0	0	0	1	0	0	0	0	0	0	0	0	0	0	1	0	0	0	0	0	0	0	0	0	0	0	0	0	0	0	0	0	1	0	0	1	0	0	0	0	1	0	1	1	1	1
Tibial stress fracture (Tibial SF)	0	1	0	0	1	0	0	0	0	0	0	0	0	0	0	1	0	0	0	0	0	0	0	0	1	0	0	0	0	0	0	0	0	0	0	0	1	0	0	0	0	0	0	0	0	0	0	0	0
Popliteal Artery Entrapment Syndrome (PAES)	0	0	0	0	0	1	1	0	0	0	0	0	0	0	1	0	0	1	0	0	0	0	0	0	0	1	0	0	0	0	0	0	0	0	0	1	0	0	0	0	0	0	1	0	0	0	0	0	0
Chronic Exertional Compartment Syndrome (CECS)	0	0	0	0	0	1	0	0	0	0	0	0	0	0	0	0	0	0	0	0	0	0	0	0	0	0	0	0	0	0	0	0	0	0	0	0	0	0	0	0	0	0	0	0	0	0	0	0	0
Medial Tibial Stress Syndrome (MTSS)	0	0	0	0	0	0	1	0	0	0	0	0	0	0	1	0	0	0	1	0	0	0	0	0	0	0	1	0	0	0	0	0	0	0	0	1	0	0	0	0	0	0	0	0	0	0	0	0	0
Chronic Exertional Compartment Syndrome (CECS)	0	0	0	0	0	1	0	0	0	0	0	0	0	0	0	0	0	0	0	0	0	0	0	0	0	0	0	0	0	0	0	0	0	0	0	0	0	0	0	0	0	0	0	0	0	0	0	0	0
Popliteal Artery Entrapment Syndrome (PAES)	0	0	0	0	0	0	1	0	0	0	0	0	0	0	1	0	0	0	0	0	1	1	0	0	0	0	0	0	0	0	0	0	0	0	0	1	0	1	0	0	0	0	1	0	0	0	1	0	0
Popliteal Artery Entrapment Syndrome (PAES)	0	1	0	0	0	0	1	0	0	0	0	0	0	0	0	0	0	0	0	0	0	0	0	0	0	0	0	0	0	0	0	0	0	0	0	0	0	0	0	0	0	0	0	0	0	0	0	0	0
Chronic Exertional Compartment Syndrome (CECS)	0	0	0	0	0	0	1	0	0	0	0	0	0	0	1	0	0	1	0	0	0	0	0	0	0	0	0	0	0	0	0	0	0	0	0	1	0	0	0	0	0	0	1	0	0	0	0	1	0
Chronic Exertional Compartment Syndrome (CECS)	0	1	0	0	0	0	1	0	0	0	0	0	0	0	1	0	0	1	0	0	0	0	0	0	0	0	0	0	0	0	0	0	0	0	0	1	0	0	0	0	0	0	0	0	0	0	0	1	0
Popliteal Artery Entrapment Syndrome (PAES)	0	0	1	0	0	0	0	0	0	0	0	0	0	0	0	0	0	0	0	0	0	0	0	1	0	0	0	0	0	0	0	0	0	0	0	1	0	0	0	0	0	0	0	0	0	0	0	0	0
Chronic Exertional Compartment Syndrome (CECS)	0	0	0	0	0	0	1	0	0	0	0	0	0	0	1	0	0	1	0	0	0	0	0	0	0	0	0	1	0	0	0	0	0	0	0	1	0	0	0	0	0	0	0	1	0	0	0	1	1
Chronic Exertional Compartment Syndrome (CECS)	0	1	0	0	1	0	1	0	0	0	0	0	0	0	1	0	0	1	0	0	0	0	0	0	0	0	0	0	1	0	0	0	0	0	0	1	0	0	0	0	0	0	1	1	0	0	0	0	0
Chronic Exertional Compartment Syndrome (CECS)	0	0	0	0	0	0	1	0	0	0	0	0	0	0	1	0	0	1	0	0	0	0	0	0	0	0	0	0	0	0	0	0	0	0	0	1	0	0	0	0	0	0	1	0	0	0	0	0	0
Tibial stress fracture (Tibial SF)	0	0	0	0	1	0	0	0	1	0	0	0	0	0	1	0	0	0	1	1	0	0	0	0	0	1	0	0	0	1	0	0	0	0	0	0	0	0	0	0	0	0	0	0	0	0	0	0	0
Accessory low lying soleus muscle (ALLSM) (ASM)	0	0	0	0	1	0	1	0	0	1	0	0	0	0	0	0	0	0	0	0	0	0	0	0	0	1	0	0	0	1	1	0	0	0	0	0	0	0	0	0	0	0	0	0	0	0	1	0	0
Medial Tibial Stress Syndrome (MTSS)	0	0	0	0	0	0	1	0	0	0	0	0	0	0	1	0	0	0	1	1	0	0	0	0	0	0	1	0	0	0	0	0	0	0	0	1	0	0	0	0	0	0	0	0	0	0	0	0	0
Tibial stress fracture (Tibial SF)	0	0	0	0	0	0	1	0	1	0	0	0	0	0	1	0	0	0	0	0	1	0	0	0	1	1	0	0	0	0	0	0	0	0	0	1	0	0	0	0	0	0	0	0	0	0	0	0	0
Chronic Exertional Compartment Syndrome (CECS)	0	0	0	0	0	0	1	0	0	0	0	0	0	0	1	0	1	1	0	0	0	0	0	0	0	0	0	0	1	0	0	0	0	0	0	1	0	0	0	0	0	0	1	1	0	0	0	1	0
Popliteal Artery Entrapment Syndrome (PAES)	0	0	0	0	0	0	0	0	0	0	0	0	0	0	0	0	0	0	0	0	0	0	0	0	0	0	0	0	0	0	0	0	0	0	0	0	0	0	0	0	0	0	1	0	0	0	0	0	0
Superficial Peroneal nerve entrapment (SPNE)	0	0	0	0	0	0	1	1	1	0	0	0	0	0	1	0	0	0	0	0	0	0	0	0	0	0	0	0	0	0	0	0	0	0	0	0	0	0	0	0	0	0	1	1	0	0	0	0	0
Chronic Exertional Compartment Syndrome (CECS)	0	0	0	0	0	0	1	0	0	0	0	0	0	0	1	0	0	1	0	0	0	0	0	0	0	0	0	0	0	0	0	0	0	0	0	0	0	0	0	0	0	0	0	0	0	0	0	0	1
Tibial stress fracture (Tibial SF)	0	0	0	0	0	0	0	0	0	0	0	0	0	0	1	0	0	0	0	0	0	0	0	0	0	0	0	0	0	0	0	0	0	0	0	0	0	0	0	0	0	0	0	0	0	0	0	0	0
Tibial stress fracture (Tibial SF)	0	0	0	0	1	0	0	0	1	0	0	1	0	1	1	0	0	0	0	0	1	0	0	0	0	1	0	0	0	0	1	0	0	0	0	1	0	0	0	0	0	0	0	0	0	0	0	0	0
Chronic Exertional Compartment Syndrome (CECS)	0	0	0	0	0	0	1	0	0	0	0	0	0	0	1	0	0	1	0	0	0	0	0	0	0	0	0	0	0	0	0	0	0	0	0	1	0	0	0	0	0	0	1	1	0	0	0	1	0
Accessory low lying soleus muscle (ALLSM) (ASM)	0	1	0	0	1	0	0	1	0	1	0	0	0	0	0	0	0	0	0	0	0	0	0	0	0	0	0	0	0	0	0	0	0	0	0	1	0	0	0	0	0	0	0	0	0	0	0	0	0
Chronic Exertional Compartment Syndrome (CECS)	0	0	0	0	0	0	1	0	0	0	0	0	0	0	1	0	0	1	0	0	0	0	0	0	0	0	0	0	0	0	0	0	0	0	0	1	0	0	0	0	0	0	0	0	0	0	0	0	0
Superficial Peroneal nerve entrapment (SPNE)	0	1	0	0	1	0	0	0	0	0	0	0	1	0	0	0	0	0	0	0	0	0	0	0	0	0	0	0	0	0	0	0	0	0	0	0	0	0	0	0	0	0	0	1	0	0	0	0	0
Popliteal Artery Entrapment Syndrome (PAES)	0	0	0	0	0	0	1	0	0	1	0	0	0	0	0	0	0	0	0	0	0	0	0	0	0	0	0	0	0	0	0	0	0	0	0	0	0	0	0	0	0	0	0	0	0	0	0	0	0
Chronic Exertional Compartment Syndrome (CECS)	0	0	0	0	0	0	1	0	0	1	0	0	0	0	1	0	0	1	0	0	0	0	0	0	0	0	0	0	0	0	0	0	0	0	0	1	0	0	0	0	0	0	1	0	0	0	0	0	0
Medial Tibial Stress Syndrome (MTSS)	0	0	0	0	0	0	0	0	0	0	0	0	0	0	0	0	0	0	0	0	0	0	0	0	0	0	1	0	0	0	0	0	0	0	0	1	0	0	0	0	0	0	0	0	0	0	0	0	0
Chronic Exertional Compartment Syndrome (CECS)	0	0	0	0	0	0	0	0	0	1	0	0	0	0	1	0	0	1	0	0	0	0	0	0	0	0	0	0	1	0	0	0	0	0	0	1	0	0	0	0	0	0	1	0	0	0	0	1	0
Tibial stress fracture (Tibial SF)	1	0	0	0	0	0	0	0	0	1	0	1	0	0	0	0	0	0	0	0	1	0	0	0	1	1	0	0	0	0	1	0	0	0	0	1	0	0	0	0	0	0	0	0	0	0	0	0	0
Popliteal Artery Entrapment Syndrome (PAES)	0	0	0	0	0	0	0	0	0	0	0	0	0	0	0	0	0	0	0	0	0	0	0	0	0	0	0	0	0	0	0	0	0	0	0	0	1	0	0	0	0	0	0	0	0	0	0	0	0
Superficial Peroneal nerve entrapment (SPNE)	1	0	0	0	0	0	1	0	0	0	0	0	0	1	1	0	0	0	0	0	0	0	0	0	0	0	0	0	0	0	0	0	0	0	0	0	0	0	0	0	0	0	1	0	0	1	1	0	0
Chronic Exertional Compartment Syndrome (CECS)	0	0	0	0	0	0	1	0	0	0	0	0	0	0	1	0	0	1	0	0	0	0	0	0	0	0	0	0	1	0	0	0	0	0	0	1	0	0	0	0	0	0	0	1	0	0	0	0	0
Tibial stress fracture (Tibial SF)	0	0	0	0	0	0	1	0	0	1	0	1	0	0	0	0	0	0	0	0	0	0	0	0	0	1	0	0	0	0	0	0	0	0	0	0	1	0	0	0	0	0	0	0	0	0	0	0	0
Medial Tibial Stress Syndrome (MTSS)	0	0	0	0	0	0	1	0	0	1	0	0	0	0	1	0	0	0	1	0	0	0	0	0	0	0	1	0	0	0	0	0	0	0	0	1	0	0	0	0	0	0	0	0	0	0	0	0	0
Popliteal Artery Entrapment Syndrome (PAES)	0	0	0	0	0	0	1	0	0	0	0	0	0	0	0	0	0	0	0	0	0	0	0	0	0	0	0	0	0	0	0	0	0	0	0	1	0	0	0	0	0	0	1	1	0	1	0	0	0
Superficial Peroneal nerve entrapment (SPNE)	0	0	0	0	0	0	0	0	0	0	0	0	0	0	0	0	0	0	0	0	0	0	0	0	0	0	0	0	0	0	0	0	0	0	0	0	0	0	0	0	0	0	0	0	0	0	0	1	1
Radiculopathy/ sciatica	0	0	0	0	0	0	0	1	0	1	0	0	0	0	1	0	0	0	0	0	0	0	0	0	0	0	0	0	0	0	0	0	0	0	0	1	1	1	1	1	0	0	0	1	1	0	1	1	0
Saphenous entrapment syndrome	0	0	0	0	0	0	0	0	0	0	0	0	0	0	0	0	0	0	0	0	0	0	0	0	0	0	0	0	0	0	0	0	0	0	0	0	1	1	0	0	0	0	0	0	0	0	0	0	1
Medial Tibial Stress Syndrome (MTSS)	0	0	0	0	0	0	0	0	0	0	0	0	0	0	1	0	0	0	1	0	0	0	0	0	0	0	1	0	0	0	0	0	0	0	0	1	0	0	0	0	0	0	0	0	0	0	0	0	0
Tibial stress fracture (Tibial SF)	0	0	0	0	0	0	0	0	0	1	0	1	0	0	1	0	0	0	0	0	1	0	0	0	0	1	0	0	0	0	1	0	0	0	0	1	0	0	0	0	0	0	0	0	0	0	0	0	0
Chronic Exertional Compartment Syndrome (CECS)	0	0	0	0	0	0	1	0	0	0	0	0	0	0	1	0	0	1	0	0	0	0	0	0	0	0	0	0	0	0	0	0	0	0	0	1	0	0	0	0	0	0	0	0	0	0	1	0	0
Popliteal Artery Entrapment Syndrome (PAES)	0	1	0	0	0	0	0	0	0	0	1	1	0	0	1	0	0	0	0	0	0	0	0	0	0	0	0	0	0	0	0	1	0	0	0	0	1	0	0	0	0	0	0	1	0	0	0	0	0
Medial Tibial Stress Syndrome (MTSS)	0	1	0	0	0	0	0	0	0	0	1	0	0	0	1	0	0	0	1	0	0	0	0	0	0	0	1	0	0	0	0	0	0	0	0	0	1	0	0	0	0	0	0	0	0	0	0	0	0
Chronic Exertional Compartment Syndrome (CECS)	0	1	0	0	1	0	1	0	0	0	0	0	0	0	1	0	0	1	0	0	0	0	0	0	0	0	0	0	1	0	0	0	0	0	0	1	0	0	0	0	0	0	1	0	0	0	0	1	1
Superficial Peroneal nerve entrapment (SPNE)	0	0	0	0	0	0	0	0	0	0	0	0	0	0	0	0	0	0	0	0	0	0	0	0	0	0	0	0	0	0	0	0	0	0	0	0	1	1	1	0	0	0	0	1	1	0	0	1	1
Radiculopathy/ sciatica	0	0	0	0	0	0	0	0	0	0	0	0	0	0	0	0	0	0	0	0	0	0	0	0	0	0	0	0	0	0	0	0	0	0	0	0	1	1	1	1	0	0	0	0	0	0	0	1	1
Tibial stress fracture (Tibial SF)	0	0	0	0	0	0	0	1	0	0	0	1	0	0	1	0	0	0	0	0	0	0	0	0	0	0	1	0	0	0	1	0	0	0	0	1	0	0	0	0	0	0	0	0	0	0	0	0	0
Chronic Exertional Compartment Syndrome (CECS)	0	0	0	0	0	0	1	0	0	1	0	0	0	0	1	0	0	1	0	0	0	0	0	0	0	0	0	0	1	0	0	0	0	0	0	1	0	0	0	0	0	0	0	0	0	0	1	0	0
Chronic Exertional Compartment Syndrome (CECS)	0	0	0	0	0	0	1	0	0	1	0	1	0	0	1	0	0	1	0	0	0	0	0	0	0	0	0	0	0	0	0	0	0	0	0	1	0	0	0	0	0	0	1	0	0	0	0	0	0
Popliteal Artery Entrapment Syndrome (PAES)	0	0	0	0	0	0	0	0	0	1	0	0	0	0	1	0	0	0	0	0	1	0	0	0	0	0	0	0	0	0	0	0	0	0	0	0	0	0	0	0	1	0	1	1	0	0	0	1	0
Chronic Exertional Compartment Syndrome (CECS)	0	0	0	0	1	0	1	0	0	1	0	0	0	0	1	0	0	1	0	0	0	0	0	0	0	0	0	0	1	0	0	0	0	0	0	1	0	0	0	0	0	0	1	0	0	0	1	1	0
Tibial stress fracture (Tibial SF)	0	0	0	0	0	0	0	0	0	0	0	0	0	0	0	0	0	0	0	0	0	0	0	0	0	1	0	0	0	0	1	0	0	0	0	1	0	0	0	0	0	0	0	0	0	0	0	0	0
Chronic Exertional Compartment Syndrome (CECS)	0	0	0	0	0	0	1	0	0	1	0	0	0	0	1	0	0	1	0	0	0	0	0	0	0	0	0	0	1	0	0	0	0	0	0	0	0	0	0	0	0	0	0	0	0	0	0	0	0
Radiculopathy/ sciatica	0	0	0	0	0	0	0	0	0	0	0	0	0	0	0	0	0	0	0	0	0	0	0	0	0	0	0	0	0	0	0	0	1	1	0	1	1	1	1	1	0	0	1	0	0	0	1	0	0
Chronic Exertional Compartment Syndrome (CECS)	0	0	0	0	0	0	1	0	0	1	0	0	0	0	1	0	0	1	0	0	0	0	0	0	0	0	0	0	0	0	0	0	0	0	0	1	0	0	0	0	0	0	0	0	0	0	1	0	0
Tibial stress fracture (Tibial SF)	0	0	0	0	0	0	0	0	1	0	0	1	0	0	1	0	0	0	0	0	0	0	0	0	0	1	0	0	0	0	1	0	0	0	0	1	0	0	0	0	0	0	0	0	0	0	0	0	0
fibular stress fracture	0	0	0	0	0	0	0	0	1	0	0	1	0	0	1	0	0	0	0	0	0	0	0	0	0	1	0	0	0	0	1	0	0	0	0	1	0	0	0	0	0	0	0	0	0	0	0	0	0
Chronic Exertional Compartment Syndrome (CECS)	0	0	0	0	1	0	1	0	0	1	0	0	0	0	1	0	0	1	0	0	0	0	0	0	0	0	0	0	0	0	0	0	0	0	0	1	0	0	0	0	0	0	1	0	0	0	0	0	0
Medial Tibial Stress Syndrome (MTSS)	0	0	0	0	0	0	1	0	0	0	0	0	0	0	1	0	0	0	1	0	0	0	0	0	0	0	1	0	0	0	0	0	0	0	0	1	0	0	0	0	0	0	0	0	0	0	0	0	0
Medial Tibial Stress Syndrome (MTSS)	0	0	0	0	0	0	1	0	1	0	0	0	0	0	1	0	0	0	1	0	0	0	0	0	0	0	1	0	0	1	0	0	0	0	0	0	0	0	0	0	0	0	0	0	0	0	0	0	0
Popliteal Artery Entrapment Syndrome (PAES)	0	1	0	0	0	0	1	0	0	0	0	0	0	0	1	0	0	0	0	0	0	0	0	0	0	0	0	0	0	0	0	1	0	0	0	1	0	0	0	0	0	0	0	0	0	0	0	0	0
McArdle syndrome	0	0	0	0	0	0	1	0	0	0	0	0	0	0	0	0	0	0	0	0	0	0	0	0	0	0	0	0	0	0	0	0	0	0	1	1	0	0	0	0	0	0	0	0	0	0	0	0	0
Chronic Exertional Compartment Syndrome (CECS)	0	0	0	0	0	0	1	0	0	0	0	0	0	0	1	0	0	1	0	0	0	0	0	0	0	0	0	0	1	0	0	0	0	0	0	1	0	0	0	0	0	0	1	1	0	0	0	0	0
Tibial stress fracture (Tibial SF)	0	0	0	0	0	0	0	0	0	0	0	1	0	0	0	0	0	0	0	0	0	0	0	0	0	0	0	0	0	0	1	0	0	0	0	1	0	0	0	0	0	0	0	0	0	0	0	0	0
Superficial Peroneal nerve entrapment (SPNE)	0	0	0	0	1	0	0	1	0	1	0	0	0	0	0	0	0	0	0	0	0	0	1	1	0	0	0	0	0	0	0	0	0	0	0	0	1	0	0	0	0	0	1	1	0	1	0	0	0
Chronic Exertional Compartment Syndrome (CECS)	0	0	0	0	0	0	1	0	0	1	0	0	0	0	1	0	0	1	0	0	0	0	0	0	0	0	0	0	0	0	0	0	0	0	0	0	0	0	0	0	0	0	0	1	0	0	0	0	0
Tibial stress fracture (Tibial SF)	0	1	0	0	1	0	1	0	0	0	0	0	0	0	0	0	0	0	0	0	0	0	0	0	0	0	0	0	0	0	1	0	0	0	0	1	0	0	0	0	0	0	0	0	0	0	0	0	0
Tibial stress fracture (Tibial SF)	0	0	0	0	0	0	0	0	0	0	0	0	0	0	1	0	0	0	0	1	0	0	0	0	0	1	0	0	0	1	1	0	0	0	0	1	0	0	0	0	0	0	0	0	0	0	0	0	0
Chronic Exertional Compartment Syndrome (CECS)	0	0	0	0	0	0	1	0	0	1	0	1	0	0	1	0	0	1	0	0	0	0	0	0	0	0	0	0	1	0	0	0	0	0	0	1	1	0	0	0	0	0	0	1	0	1	0	0	0
McArdle syndrome	0	0	0	0	0	0	1	0	0	1	0	0	0	0	0	0	0	0	0	0	0	0	0	0	0	0	0	0	0	0	0	0	0	0	1	0	0	0	0	0	0	0	0	0	0	0	0	1	0
Chronic Exertional Compartment Syndrome (CECS)	0	0	0	0	0	0	1	0	0	1	0	0	0	0	1	0	0	1	0	0	0	0	0	0	0	0	0	0	0	0	0	0	0	0	0	0	0	0	0	0	0	0	0	1	0	0	0	0	0
Medial Tibial Stress Syndrome (MTSS)	0	0	0	0	0	0	1	0	0	0	0	0	0	0	0	0	0	0	1	0	0	0	0	0	0	0	1	0	0	0	0	0	0	0	0	1	0	0	0	0	0	0	0	0	0	0	0	0	0
Chronic Exertional Compartment Syndrome (CECS)	0	1	0	0	0	0	1	0	0	0	0	0	0	0	1	0	0	1	0	0	0	0	0	0	0	0	0	0	0	0	0	0	0	0	0	1	0	0	0	0	0	0	0	0	0	0	0	1	0
Medial Tibial Stress Syndrome (MTSS)	0	1	0	0	0	0	1	0	0	0	0	0	0	0	1	0	0	0	1	0	0	0	0	0	0	0	1	0	0	0	0	0	0	0	0	1	0	0	0	0	0	0	0	0	0	0	0	0	0
Tibial stress fracture (Tibial SF)	0	0	0	0	0	0	1	0	0	0	0	0	0	0	1	0	0	0	0	0	1	1	0	0	0	1	0	0	0	0	0	0	0	0	0	1	0	0	0	0	0	0	0	0	0	0	0	0	0
Popliteal Artery Entrapment Syndrome (PAES)	0	1	0	0	0	0	1	0	0	0	0	0	0	0	1	0	0	1	0	0	0	0	0	0	0	0	0	0	0	0	0	0	0	0	0	1	0	0	1	0	1	0	0	1	0	0	0	0	0
Superficial Peroneal nerve entrapment (SPNE)	0	1	0	0	0	0	1	0	0	0	0	0	0	0	0	0	0	1	0	0	0	0	0	0	0	0	0	0	0	0	0	0	0	0	0	1	0	0	1	0	0	0	0	1	0	1	1	1	1
Tibial stress fracture (Tibial SF)	0	0	0	0	1	0	0	0	1	0	0	1	0	1	1	0	0	0	0	0	1	0	0	0	0	1	0	0	0	0	1	0	0	0	0	1	0	0	0	0	0	0	0	0	0	0	0	0	0
Chronic Exertional Compartment Syndrome (CECS)	0	0	0	0	1	0	1	0	0	1	0	0	0	0	1	0	0	1	0	0	0	0	0	0	0	0	0	0	0	0	0	0	0	0	0	1	0	0	0	0	0	0	1	0	0	0	0	0	0
Tibial stress fracture (Tibial SF)	0	0	0	0	0	0	1	0	0	0	0	0	0	1	1	0	1	1	0	0	0	0	0	0	0	1	0	0	0	1	0	0	0	0	0	1	1	0	0	0	0	0	0	0	0	0	0	0	0
Chronic Exertional Compartment Syndrome (CECS)	1	0	0	0	0	0	1	0	0	0	0	0	0	0	1	0	0	0	0	0	0	0	0	0	0	0	0	0	0	0	0	0	0	0	0	1	0	0	0	0	0	0	2	0	0	0	0	0	0
Tibial stress fracture (Tibial SF)	0	0	0	0	0	0	0	0	0	0	0	0	0	0	0	0	0	0	0	0	0	0	0	0	0	1	0	0	0	0	1	0	0	0	0	1	0	0	0	0	0	0	0	0	0	0	0	0	0
Medial Tibial Stress Syndrome (MTSS)	0	0	0	0	0	0	0	0	0	0	0	0	0	0	0	0	0	0	0	0	0	0	0	0	0	0	1	0	0	0	0	0	0	0	0	1	0	0	0	0	0	0	0	0	0	0	0	0	0
Chronic Exertional Compartment Syndrome (CECS)	0	1	0	0	0	0	1	0	0	0	0	0	0	0	1	0	0	1	0	0	0	0	0	0	0	0	0	0	0	0	0	0	0	0	0	1	0	0	0	0	0	0	0	0	0	0	0	1	0
Medial Tibial Stress Syndrome (MTSS)	0	1	0	0	0	0	1	0	0	0	0	0	0	0	1	0	0	0	1	0	0	0	0	0	0	0	1	0	0	0	0	0	0	0	0	1	0	0	0	0	0	0	0	0	0	0	0	0	0
Tibial stress fracture (Tibial SF)	0	0	0	0	0	0	1	0	0	0	0	0	0	0	1	0	0	0	0	0	1	1	0	0	0	1	0	0	0	0	0	0	0	0	0	1	0	0	0	0	0	0	0	0	0	0	0	0	0
Popliteal Artery Entrapment Syndrome (PAES)	0	1	0	0	0	0	1	0	0	0	0	0	0	0	1	0	0	1	0	0	0	0	0	0	0	0	0	0	0	0	0	0	0	0	0	1	0	0	1	0	1	0	0	1	0	0	0	0	0
Superficial Peroneal nerve entrapment (SPNE)	0	1	0	1	0	0	1	0	0	0	0	0	0	0	1	0	0	0	0	0	0	1	0	0	0	0	0	0	0	0	0	0	0	0	0	1	0	0	0	0	0	0	0	1	0	1	0	0	0
Radiculopathy/ sciatica	0	1	0	0	0	0	0	0	0	0	0	0	0	0	0	0	0	0	0	0	0	0	0	0	0	0	0	0	0	0	0	0	0	0	0	0	1	1	1	1	0	0	0	0	0	0	0	0	0
Myofascial tears	0	0	0	0	0	0	1	0	0	0	1	0	0	0	0	0	0	0	0	0	0	0	0	0	0	0	0	0	0	0	0	0	0	0	0	1	0	0	1	0	0	0	0	0	0	0	0	0	0
Tibial stress fracture (Tibial SF)	0	0	0	0	1	0	0	0	1	0	0	0	0	0	1	0	0	0	1	1	0	0	0	0	0	1	0	0	0	1	0	0	0	0	0	1	1	0	0	0	0	0	0	0	0	0	0	0	0
Tibial stress fracture (Tibial SF)	0	1	0	0	1	0	1	0	0	0	0	0	0	0	0	0	0	0	0	0	0	0	0	0	0	0	0	0	0	0	1	0	0	0	0	1	0	0	0	0	0	0	0	0	0	0	0	0	0
Chronic Exertional Compartment Syndrome (CECS)	0	0	0	0	0	0	1	0	0	0	0	0	0	0	1	0	0	1	0	0	0	0	0	0	0	0	0	0	1	0	0	0	0	0	0	1	0	0	0	0	0	0	0	1	0	0	0	0	0
Tibial stress fracture (Tibial SF)	0	0	0	0	0	0	1	0	0	1	0	1	0	0	0	0	0	0	0	0	0	0	0	0	0	1	0	0	0	0	0	0	0	0	0	0	1	0	0	0	0	0	0	0	0	0	0	0	0
Medial Tibial Stress Syndrome (MTSS)	0	0	0	0	0	0	1	0	0	1	0	0	0	0	1	0	0	0	1	0	0	0	0	0	0	0	1	0	0	0	0	0	0	0	0	1	0	0	0	0	0	0	0	0	0	0	0	0	0
Popliteal Artery Entrapment Syndrome (PAES)	0	0	0	0	0	0	1	0	0	1	0	0	0	0	0	0	0	0	0	0	0	0	0	0	0	0	0	0	0	0	0	0	0	0	0	0	0	0	0	0	0	0	1	0	0	0	0	0	0
Accessory low lying soleus muscle (ALLSM) (ASM)	0	0	0	0	0	0	0	0	0	0	1	0	0	0	0	0	0	0	0	0	0	0	0	0	0	0	0	0	0	0	0	0	0	0	0	0	0	0	0	0	0	0	0	0	0	0	0	0	0
Myofascial tears	0	0	0	0	0	0	0	1	0	0	1	0	0	0	0	0	0	0	0	0	0	0	0	0	0	0	0	0	0	0	0	0	0	0	0	1	0	0	1	0	0	0	1	1	0	0	0	0	0
Chronic Exertional Compartment Syndrome (CECS)	0	0	0	0	0	0	1	0	0	0	0	0	0	0	0	0	0	0	0	0	0	0	0	0	0	0	0	0	0	0	0	0	0	0	0	1	0	0	0	0	0	0	0	0	0	0	0	0	0
Tibial stress fracture (Tibial SF)	0	0	0	0	0	0	1	0	1	0	0	0	0	0	1	0	0	0	0	0	1	0	0	0	1	1	0	0	0	0	0	0	0	0	0	1	0	0	0	0	0	0	0	0	0	0	0	0	0
Accessory low lying soleus muscle (ALLSM) (ASM)	0	0	0	0	0	0	1	0	0	0	0	0	0	0	0	0	0	0	0	0	0	0	1	0	0	0	0	0	0	0	0	0	0	0	0	1	0	0	0	0	0	0	0	0	0	0	0	0	0
Chronic Exertional Compartment Syndrome (CECS)	0	0	0	0	0	0	1	0	0	1	0	0	0	0	1	0	0	1	0	0	0	0	0	0	0	0	0	0	0	0	0	0	0	0	0	1	0	0	0	0	0	0	1	0	0	0	0	1	0
Chronic Exertional Compartment Syndrome (CECS)	0	0	0	0	0	0	1	0	0	1	0	0	0	0	1	0	0	1	0	0	0	0	0	0	0	0	0	0	0	0	0	0	0	0	0	1	0	0	0	0	0	0	1	0	0	0	0	1	0
Chronic Exertional Compartment Syndrome (CECS)	0	0	0	0	0	0	1	0	0	0	0	1	0	0	0	0	1	0	0	0	0	0	0	0	0	0	0	0	0	0	0	0	0	0	0	1	0	0	0	0	0	0	1	0	0	0	0	0	0
Chronic Exertional Compartment Syndrome (CECS)	0	0	0	0	0	0	1	0	0	0	0	1	0	0	0	0	1	0	0	0	0	0	0	0	0	0	0	0	0	0	0	0	0	0	0	1	1	0	0	0	0	0	1	0	0	1	0	1	1
Tibial stress fracture (Tibial SF)	0	1	0	0	1	0	0	0	0	0	1	0	0	0	0	1	0	0	0	0	0	0	0	1	1	0	0	0	0	0	0	0	0	0	0	0	1	0	0	0	0	0	0	0	0	0	0	0	0
Tibial stress fracture (Tibial SF)	0	0	0	0	0	0	1	0	0	0	0	0	0	0	0	0	0	0	0	0	0	0	0	0	0	1	0	0	0	1	1	0	0	0	0	1	0	0	0	0	0	0	0	0	0	0	0	0	0
Chronic Exertional Compartment Syndrome (CECS)	0	0	0	0	0	0	0	0	0	0	0	0	0	0	0	0	0	0	0	0	0	0	0	0	0	0	0	0	0	0	0	0	0	0	0	0	0	0	0	0	0	0	0	0	0	0	0	0	0
Popliteal Artery Entrapment Syndrome (PAES)	0	1	0	0	0	0	1	0	0	0	0	0	0	0	1	0	0	0	0	0	0	0	0	0	0	0	0	0	0	0	0	0	0	0	0	1	0	0	0	0	0	0	0	1	0	0	0	0	0
Chronic Exertional Compartment Syndrome (CECS)	0	0	0	0	0	0	1	0	0	0	0	0	0	0	1	0	1	1	0	0	0	0	0	0	0	0	0	0	1	0	0	0	0	0	0	1	0	0	0	0	0	0	1	1	0	0	0	0	0
Superficial Peroneal nerve entrapment (SPNE)	0	0	0	0	0	0	1	0	1	0	0	0	0	0	0	0	0	0	0	0	0	0	0	0	0	0	0	0	0	0	0	0	0	0	0	0	0	0	0	0	0	0	1	1	1	0	0	1	1
Superficial Peroneal nerve entrapment (SPNE)	0	0	0	0	0	0	1	0	0	1	0	0	0	0	1	0	0	0	0	0	0	0	0	1	0	0	0	0	1	0	0	0	0	0	1	1	0	0	1	0	0	0	0	1	0	0	1	1	0
Chronic Exertional Compartment Syndrome (CECS)	0	0	0	0	0	0	0	0	0	0	0	0	0	0	0	0	0	0	0	0	0	0	0	0	0	0	0	0	0	0	0	0	0	0	0	1	0	0	0	0	0	0	0	0	0	0	0	0	0
Medial Tibial Stress Syndrome (MTSS)	0	0	0	0	0	0	0	0	0	0	0	0	0	0	0	0	0	0	0	0	0	0	0	0	0	0	1	0	0	0	0	0	0	0	0	1	0	0	0	0	0	0	0	0	0	0	0	0	0
Superficial Peroneal nerve entrapment (SPNE)	0	0	0	0	0	0	0	0	0	0	0	0	0	0	0	0	0	0	0	0	0	0	0	0	0	0	0	0	0	0	0	0	0	0	0	0	0	0	0	0	0	0	1	0	0	0	0	0	0
Tibial stress fracture (Tibial SF)	1	0	0	0	1	0	0	0	0	0	0	0	0	0	1	0	0	0	0	0	0	0	0	0	0	0	0	0	0	2	0	0	0	0	0	1	0	0	0	0	0	0	0	0	0	0	0	0	0
Chronic Exertional Compartment Syndrome (CECS)	0	0	0	0	0	0	1	0	0	0	0	0	0	0	1	0	0	1	0	0	0	0	0	0	0	0	0	0	0	0	0	0	0	0	0	0	0	0	0	0	0	0	0	0	0	0	0	0	1
Chronic Exertional Compartment Syndrome (CECS)	0	0	0	0	0	0	1	0	0	0	0	0	0	0	1	0	0	1	0	0	0	0	0	0	0	0	0	0	0	0	0	0	0	0	0	0	0	0	0	0	0	0	0	0	0	0	0	0	1
Accessory low lying soleus muscle (ALLSM) (ASM)	0	0	0	0	1	0	1	0	0	1	0	0	0	0	0	0	0	0	0	0	0	0	0	0	0	1	0	0	0	1	1	0	0	0	0	0	0	0	0	0	0	0	0	0	0	0	1	0	0
Tibial stress fracture (Tibial SF)	0	0	0	0	0	0	1	0	0	1	0	1	0	0	0	0	0	0	0	0	0	0	0	0	0	1	0	0	0	0	0	0	0	0	0	0	1	0	0	0	0	0	0	0	0	0	0	0	0
Medial Tibial Stress Syndrome (MTSS)	0	0	0	0	0	0	1	0	0	1	0	0	0	0	1	0	0	0	1	0	0	0	0	0	0	0	1	0	0	0	0	0	0	0	0	1	0	0	0	0	0	0	0	0	0	0	0	0	0
Superficial Peroneal nerve entrapment (SPNE)	0	1	0	0	0	0	1	0	0	0	0	0	0	0	0	0	0	0	0	0	0	0	0	0	0	0	0	0	0	0	0	0	0	0	0	1	0	0	0	0	0	0	0	0	0	0	0	0	0
Chronic Exertional Compartment Syndrome (CECS)	0	0	0	0	0	0	1	0	0	0	0	1	0	0	0	0	1	0	0	0	0	0	0	0	0	0	0	0	0	0	0	0	0	0	0	1	0	0	0	0	0	0	1	0	0	0	0	0	0
Popliteal Artery Entrapment Syndrome (PAES)	0	0	0	0	0	0	1	0	0	0	0	0	0	0	0	0	1	0	0	0	0	0	0	0	0	0	0	0	0	0	0	0	0	0	0	1	0	0	0	0	0	0	0	0	0	0	0	0	0
Chronic Exertional Compartment Syndrome (CECS)	0	0	0	0	0	0	1	0	0	0	0	1	0	0	0	0	1	0	0	0	0	0	0	0	0	0	0	0	0	0	0	0	0	0	0	1	1	0	0	0	0	0	1	0	0	1	0	1	1
Tibial stress fracture (Tibial SF)	0	0	0	0	0	0	1	0	0	0	0	0	0	0	0	0	0	0	0	0	0	0	0	0	0	1	0	0	0	1	1	0	0	0	0	1	0	0	0	0	0	0	0	0	0	0	0	0	0
Medial Tibial Stress Syndrome (MTSS)	0	0	0	0	0	0	1	0	0	0	0	0	0	0	0	0	0	0	1	0	0	0	0	0	0	0	1	0	0	0	0	0	0	0	0	1	0	0	0	0	0	0	0	0	0	0	0	0	0
Chronic Exertional Compartment Syndrome (CECS)	0	0	0	0	0	0	1	0	0	0	0	0	0	0	1	0	0	1	0	0	0	0	0	0	0	0	0	0	0	0	0	0	0	0	0	0	0	0	0	0	0	0	0	0	0	0	0	0	1
Popliteal Artery Entrapment Syndrome (PAES)	0	0	0	0	0	0	1	0	0	0	0	0	0	0	0	0	1	0	0	0	0	0	0	0	0	0	0	0	0	0	0	0	0	0	0	1	0	0	0	0	0	0	0	0	0	0	0	0	0
Chronic Exertional Compartment Syndrome (CECS)	0	1	0	0	0	0	1	0	0	0	0	0	0	0	1	0	0	1	0	0	0	0	0	0	0	0	0	0	0	0	0	0	0	0	0	1	0	0	0	0	0	0	1	0	0	0	0	1	0
Medial Tibial Stress Syndrome (MTSS)	0	1	0	0	0	0	0	0	0	0	1	0	0	0	1	0	0	0	1	0	0	0	0	0	0	0	1	0	0	0	0	0	0	0	0	0	1	0	0	0	0	0	0	0	0	0	0	1	0
Medial Tibial Stress Syndrome (MTSS)	0	1	0	0	0	0	1	0	0	0	0	0	0	0	1	0	0	0	1	0	0	0	0	0	0	0	1	0	0	0	0	0	0	0	0	1	0	0	0	0	0	0	0	0	0	0	0	0	0
Chronic Exertional Compartment Syndrome (CECS)	0	0	0	0	0	0	0	0	0	1	0	0	0	0	1	0	0	1	0	0	0	0	0	0	0	0	0	0	1	0	0	0	0	0	0	1	0	0	0	0	0	0	1	0	0	0	0	1	0
1
Chronic Exertional Compartment Syndrome (CECS)	1	15	0	0	5	2	49	0	0	15	0	6	0	0	47	0	6	45	0	0	0	0	1	0	0	0	0	1	13	0	0	0	0	0	0	45	3	0	0	0	1	0	26	12	0	3	5	21	9
Medial Tibial Stress Syndrome (MTSS)	0	8	0	0	0	0	15	0	1	3	2	0	0	0	16	0	0	1	17	1	0	0	0	0	0	0	21	0	0	1	1	0	0	0	0	18	2	0	0	0	0	0	0	0	0	0	1	1	0
Tibial stress fracture (Tibial SF)	2	5	0	0	9	0	15	1	8	5	1	10	1	3	17	2	1	1	2	3	10	3	0	1	5	23	1	0	0	6	14	0	0	0	0	24	7	0	0	0	0	0	0	0	0	1	0	0	0
Superficial Peroneal nerve entrapment (SPNE)	1	7	0	2	2	0	9	2	3	2	1	0	1	1	6	0	0	2	0	0	1	3	1	2	0	0	0	0	1	0	0	0	0	0	1	6	2	1	4	0	0	0	5	10	2	6	4	6	5
Myofascial tears	0	0	0	0	0	0	1	2	1	0	3	0	0	0	0	0	0	0	0	0	0	0	0	0	0	0	0	0	0	0	0	0	0	0	0	2	1	0	2	0	0	0	1	1	0	0	0	1	0
Radiculopathy/ sciatica	0	4	0	0	0	0	0	2	2	1	0	0	0	0	1	0	0	0	0	0	0	0	0	0	0	0	0	0	0	0	0	0	1	1	0	2	7	7	6	7	0	0	3	3	1	1	2	4	3
Popliteal Artery Entrapment Syndrome (PAES)	0	11	3	0	0	1	17	0	1	3	1	1	1	0	10	0	2	5	0	0	2	1	0	1	0	1	0	0	0	0	0	2	0	0	0	13	2	1	3	1	4	0	9	7	0	1	1	2	0
McArdle syndrome	0	0	0	0	0	0	2	0	0	1	0	0	0	0	0	0	0	0	0	0	0	0	0	0	0	0	0	0	0	0	0	0	0	0	2	1	0	0	0	0	0	0	0	0	0	0	0	1	0
Accessory low lying soleus muscle (ALLSM) (ASM)	0	1	0	0	3	0	3	1	0	3	1	0	0	0	0	0	0	0	0	0	0	0	1	0	0	2	0	0	0	2	2	0	0	0	0	2	0	0	0	0	0	0	0	0	0	0	2	0	0
>=0
Chronic Exertional Compartment Syndrome (CECS)	59	59	59	59	59	59	59	59	59	59	59	59	59	59	59	59	59	59	59	59	59	59	59	59	59	59	59	59	59	59	59	59	59	59	59	59	59	59	59	59	59	59	59	59	59	59	59	59	59
Medial Tibial Stress Syndrome (MTSS)	21	21	21	21	21	21	21	21	21	21	21	21	21	21	21	21	21	21	21	21	21	21	21	21	21	21	21	21	21	21	21	21	21	21	21	21	21	21	21	21	21	21	21	21	21	21	21	21	21
Tibial stress fracture (Tibial SF)	31	31	31	31	31	31	31	31	31	31	31	31	31	31	31	31	31	31	31	31	31	31	31	31	31	31	31	31	31	31	31	31	31	31	31	31	31	31	31	31	31	31	31	31	31	31	31	31	31
Superficial Peroneal nerve entrapment (SPNE)	15	15	15	15	15	15	15	15	15	15	15	15	15	15	15	15	15	15	15	15	15	15	15	15	15	15	15	15	15	15	15	15	15	15	15	15	15	15	15	15	15	15	15	15	15	15	15	15	15
Myofascial tears	3	3	3	3	3	3	3	3	3	3	3	3	3	3	3	3	3	3	3	3	3	3	3	3	3	3	3	3	3	3	3	3	3	3	3	3	3	3	3	3	3	3	3	3	3	3	3	3	3
Radiculopathy/ sciatica	7	7	7	7	7	7	7	7	7	7	7	7	7	7	7	7	7	7	7	7	7	7	7	7	7	7	7	7	7	7	7	7	7	7	7	7	7	7	7	7	7	7	7	7	7	7	7	7	7
Popliteal Artery Entrapment Syndrome (PAES)	22	22	22	22	22	22	22	22	22	22	22	22	22	22	22	22	22	22	22	22	22	22	22	22	22	22	22	22	22	22	22	22	22	22	22	22	22	22	22	22	22	22	22	22	22	22	22	22	22
McArdle syndrome	2	2	2	2	2	2	2	2	2	2	2	2	2	2	2	2	2	2	2	2	2	2	2	2	2	2	2	2	2	2	2	2	2	2	2	2	2	2	2	2	2	2	2	2	2	2	2	2	2
Accessory low lying soleus muscle (ALLSM) (ASM)	5	5	5	5	5	5	5	5	5	5	5	5	5	5	5	5	5	5	5	5	5	5	5	5	5	5	5	5	5	5	5	5	5	5	5	5	5	5	5	5	5	5	5	5	5	5	5	5	5
Average Percentage
Chronic Exertional Compartment Syndrome (CECS)	1.69492	25.4237	0	0	8.47458	3.38983	83.0508	0	0	25.4237	0	10.1695	0	0	79.661	0	10.1695	76.2712	0	0	0	0	1.69492	0	0	0	0	1.69492	22.0339	0	0	0	0	0	0	76.2712	5.08475	0	0	0	1.69492	0	44.0678	20.339	0	5.08475	8.47458	35.5932	15.2542
Medial Tibial Stress Syndrome (MTSS)	0	38.0952	0	0	0	0	71.4286	0	4.7619	14.2857	9.52381	0	0	0	76.1905	0	0	4.7619	80.9524	4.7619	0	0	0	0	0	0	100	0	0	4.7619	4.7619	0	0	0	0	85.7143	9.52381	0	0	0	0	0	0	0	0	0	4.7619	4.7619	0
Tibial stress fracture (Tibial SF)	6.45161	16.129	0	0	29.0323	0	48.3871	3.22581	25.8065	16.129	3.22581	32.2581	3.22581	9.67742	54.8387	6.45161	3.22581	3.22581	6.45161	9.67742	32.2581	9.67742	0	3.22581	16.129	74.1935	3.22581	0	0	19.3548	45.1613	0	0	0	0	77.4194	22.5806	0	0	0	0	0	0	0	0	3.22581	0	0	0
Superficial Peroneal nerve entrapment (SPNE)	6.66667	46.6667	0	13.3333	13.3333	0	60	13.3333	20	13.3333	6.66667	0	6.66667	6.66667	40	0	0	13.3333	0	0	6.66667	20	6.66667	13.3333	0	0	0	0	6.66667	0	0	0	0	0	6.66667	40	13.3333	6.66667	26.6667	0	0	0	33.3333	66.6667	13.3333	40	26.6667	40	33.3333
Myofascial tears	0	0	0	0	0	0	33.3333	66.6667	33.3333	0	100	0	0	0	0	0	0	0	0	0	0	0	0	0	0	0	0	0	0	0	0	0	0	0	0	66.6667	33.3333	0	66.6667	0	0	0	33.3333	33.3333	0	0	0	33.3333	0
Radiculopathy/ sciatica	0	57.1429	0	0	0	0	0	28.5714	28.5714	14.2857	0	0	0	0	14.2857	0	0	0	0	0	0	0	0	0	0	0	0	0	0	0	0	0	14.2857	14.2857	0	28.5714	100	100	85.7143	100	0	0	42.8571	42.8571	14.2857	14.2857	28.5714	57.1429	42.8571
Popliteal Artery Entrapment Syndrome (PAES)	0	50	13.6364	0	0	4.54545	77.2727	0	4.54545	13.6364	4.54545	4.54545	4.54545	0	45.4545	0	9.09091	22.7273	0	0	9.09091	4.54545	0	4.54545	0	4.54545	0	1.85185	24.0741	0	0	9.09091	0	0	0	59.0909	9.09091	4.54545	13.6364	4.54545	18.1818	0	40.9091	31.8182	0	4.54545	4.54545	9.09091	0
McArdle syndrome	0	0	0	0	0	0	100	0	0	50	0	0	0	0	0	0	0	0	0	0	0	0	0	0	0	0	0	0	0	0	0	0	0	0	100	50	0	0	0	0	0	0	0	0	0	0	0	50	0
Accessory low lying soleus muscle (ALLSM) (ASM)	0	20	0	0	60	0	60	20	0	60	20	0	0	0	0	0	0	0	0	0	0	0	20	0	0	40	0	0	0	40	40	0	0	0	0	40	0	0	0	0	0	0	0	0	0	0	40	0	0
[truncated: 216 more columns]

## Sheet: Sheet 4
	Condition	History 0= Medical history of other pathologies 1= No medical history 2= No trauma history 3= Exertional pain 4= Non-exertional pain 5= Pain during rest 6= Pain relieved by rest 7= Direct/ indirect trauma onset 8= Gradual (insidious) onset of pain 9= Sudden onset of pain 10= Gradual onset during exercise 11= Pain stops immediately after stopping 12= Pain subside after short time (few mins to hour…																									Symptoms 0= Dull aching pain in the lower leg 1= sharp pain in the lower leg 2= Shooting/ electrical pain 3= Radiating pain 4= LBP 5= Restless leg 6= Paraesthesia 7= Numbness 8= Pins & needles 9= Tingling 10= Burning 11= Weakness 12= Sensory loss 13= Altered sensation 14= Skin coolness 15= Tightness/ sense of fullness 16= Cramps/cramping 17= Muscle strain feeling 18= Tenderness after the exercise…
		0	1	2	3	4	5	6	7	8	9	10	11	12	13	14	15	16	17	18	19	20	21	22	23	24	0	1	2	3	4	5	6	7	8	9	10	11	12	13	14	15	16	17	18	19	20	21	22
	Popliteal Artery Entrapment Syndrome (PAES)	0	1	0	1	0	0	0	0	0	0	0	0	0	0	0	0	0	0	0	0	0	0	0	0	0	0	0	0	0	0	0	1	0	0	0	0	0	0	0	1	0	1	0	0	1	0	0	0
	Chronic Exertional Compartment Syndrome (CECS)	0	0	0	1	0	0	0	0	0	0	1	0	1	0	0	0	0	0	0	0	0	0	0	0	0	0	0	0	0	0	0	1	0	0	0	0	0	0	0	0	1	1	0	0	0	0	0	0
	Tibial stress fracture (Tibial SF)	0	0	0	1	0	0	0	0	0	1	0	0	0	0	0	0	0	0	1	0	0	0	0	0	0	1	0	0	0	0	0	0	0	0	0	0	0	0	0	0	0	0	0	0	0	0	0	0
	Popliteal Artery Entrapment Syndrome (PAES)	0	1	0	1	0	0	0	0	0	1	0	0	0	0	0	0	0	0	0	0	0	0	0	0	0	0	0	0	0	0	0	1	0	0	0	0	1	0	0	0	1	1	0	0	1	0	0	0
	Chronic Exertional Compartment Syndrome (CECS)	0	1	0	1	0	0	0	0	0	0	1	0	0	0	0	0	0	0	0	0	0	0	0	0	0	1	0	0	0	0	0	0	0	0	0	0	0	0	0	0	0	0	0	0	0	0	0	0
	Medial Tibial Stress Syndrome (MTSS)	0	1	0	1	0	0	0	0	0	0	1	0	0	1	0	0	0	0	0	1	0	1	0	0	0	1	0	0	0	0	0	0	0	0	0	0	0	0	0	0	0	0	0	0	0	0	0	0
	Soleal sling syndrome	0	1	0	0	0	0	0	0	0	0	0	0	0	0	0	0	0	0	0	0	0	0	0	0	0	1	0	0	0	0	0	0	1	0	0	0	0	1	0	0	1	0	0	0	0	0	0	0
	Radiculopathy/ sciatica	0	1	0	0	0	0	0	0	0	0	0	0	0	0	0	0	0	0	0	0	0	0	0	0	0	0	1	1	1	1	0	0	0	0	0	0	0	0	1	0	0	0	0	0	0	0	0	0
	Tibial stress fracture (Tibial SF)	0	1	0	1	0	1	0	0	0	0	1	0	0	0	0	1	0	0	1	0	0	0	0	0	0	1	0	0	0	0	0	0	0	0	1	0	0	0	0	0	0	0	0	0	0	0	0	0
	Chronic Exertional Compartment Syndrome (CECS)	0	1	0	1	0	0	0	0	0	0	1	0	1	0	0	0	0	0	0	0	0	0	0	0	0	1	0	0	0	0	0	0	0	0	0	0	0	0	0	0	0	0	0	1	0	0	0	0
	Radiculopathy/ sciatica	0	1	0	0	0	1	0	0	0	0	0	0	0	0	0	0	0	0	0	0	0	0	0	0	0	0	1	1	0	1	0	1	1	0	1	0	1	1	0	0	0	0	0	0	0	0	0	0
	Popliteal Artery Entrapment Syndrome (PAES)	0	1	0	1	0	0	0	0	0	0	0	0	0	0	0	0	0	0	0	0	0	0	0	0	0	1	0	0	0	0	0	0	0	0	0	0	0	0	0	0	0	0	0	0	1	1	0	0
	Medial Tibial Stress Syndrome (MTSS)	0	1	0	1	0	0	0	0	0	0	1	0	1	0	0	0	0	0	0	1	0	0	0	0	0	1	0	0	0	0	0	0	0	0	0	1	0	0	0	0	0	0	0	0	0	0	0	0
	Chronic Exertional Compartment Syndrome (CECS)	0	1	0	1	0	0	0	0	0	0	1	0	1	0	0	0	0	0	0	0	0	0	0	0	0	1	0	0	0	0	1	0	0	0	0	0	0	0	1	0	1	1	0	0	0	0	0	0
	Chronic Exertional Compartment Syndrome (CECS)	0	1	0	1	0	0	0	0	0	0	1	0	1	0	0	0	0	0	0	0	0	0	0	0	0	1	0	0	0	0	0	1	0	0	0	0	1	0	0	0	1	1	0	0	0	0	0	0
	Superficial Peroneal nerve entrapment (SPNE)	0	1	0	1	0	0	0	0	0	0	1	0	0	0	0	0	0	0	0	0	0	0	0	0	0	1	0	0	0	0	0	0	1	0	1	0	0	0	1	0	0	0	0	0	0	0	0	0
	Tibial nerve entrapment	0	1	0	1	0	1	0	0	0	0	0	0	0	0	0	1	0	0	0	0	0	0	0	0	0	1	0	0	0	0	0	0	1	0	1	0	0	0	0	0	0	1	0	0	0	0	0	0
	Superficial Peroneal nerve entrapment (SPNE)	0	1	0	0	0	1	0	1	0	0	1	0	0	0	0	1	0	0	0	0	0	0	0	0	0	0	0	0	0	0	0	0	0	0	0	0	0	0	1	0	1	0	0	0	0	0	0	0
	Popliteal Artery Entrapment Syndrome (PAES)	0	1	0	1	0	1	0	0	0	0	1	0	1	0	0	0	0	0	0	0	0	0	0	0	0	1	0	0	0	1	0	1	0	0	0	0	0	0	0	0	0	0	0	0	1	0	0	0
	Myofascial tears	0	0	0	0	1	1	0	1	0	0	0	0	0	0	0	0	0	0	0	0	0	0	0	0	0	0	1	0	0	0	0	0	0	0	0	0	1	0	0	0	0	0	0	1	0	0	0	0
	Chronic Exertional Compartment Syndrome (CECS)	2	1	0	1	0	0	0	0	0	0	1	0	1	0	0	0	1	0	0	0	0	0	0	0	0	1	0	0	0	0	0	1	0	0	0	1	1	1	0	0	1	1	0	0	0	0	0	0
	Chronic Exertional Compartment Syndrome (CECS)	0	1	0	0	0	0	0	0	0	0	1	0	1	0	0	0	0	0	0	0	0	0	0	0	0	1	0	0	0	0	0	0	0	0	0	0	0	0	0	0	1	0	0	0	0	0	0	0
	Chronic Exertional Compartment Syndrome (CECS)	0	1	0	1	0	0	0	0	0	0	1	0	1	0	0	0	0	0	0	0	0	0	0	0	0	1	0	0	0	0	0	0	0	0	0	0	1	0	1	0	1	1	0	1	0	0	0	0
	Chronic Exertional Compartment Syndrome (CECS)	0	0	0	0	0	0	0	0	0	0	0	0	0	0	0	0	0	0	0	0	0	0	0	0	0	0	0	0	0	0	0	0	0	0	0	0	0	0	0	0	0	0	0	0	0	0	0	0
	Chronic Exertional Compartment Syndrome (CECS)	0	0	0	0	0	0	0	0	0	0	0	0	0	0	0	0	0	0	0	0	0	0	0	0	0	0	0	0	0	0	0	0	0	0	0	0	0	0	0	0	0	0	0	0	0	0	0	0
	Chronic Exertional Compartment Syndrome (CECS)	0	0	0	0	0	0	0	0	0	0	0	0	0	0	0	0	0	0	0	0	0	0	0	0	0	0	0	0	0	0	0	0	0	0	0	0	0	0	0	0	0	0	0	0	0	0	0	0
	Chronic Exertional Compartment Syndrome (CECS)	0	1	0	1	0	0	0	0	0	0	1	0	1	0	0	0	0	0	0	0	0	0	0	0	0	1	0	0	0	0	0	1	1	0	0	0	1	0	0	0	1	1	0	0	0	0	0	0
	Radiculopathy/ sciatica	0	1	0	0	1	1	0	0	0	0	0	0	0	0	0	0	0	0	0	0	0	0	0	0	0	0	1	1	1	1	0	1	1	0	0	0	1	1	1	0	0	0	0	0	0	0	0	0
	Chronic Exertional Compartment Syndrome (CECS)	0	1	0	1	0	0	0	0	0	0	1	0	1	0	0	0	0	0	0	0	0	0	0	0	0	1	0	0	0	0	0	0	0	0	0	0	1	0	0	0	1	1	0	0	0	0	0	0
	Medial Tibial Stress Syndrome (MTSS)	0	1	0	1	0	0	0	0	0	0	1	0	0	1	0	0	0	0	0	1	0	0	0	0	0	1	0	0	0	0	0	0	0	0	0	0	0	0	0	0	0	0	0	0	0	0	0	0
	Tibial stress fracture (Tibial SF)	0	0	0	1	0	0	0	0	0	0	1	0	0	0	0	1	0	0	1	0	0	0	0	0	0	1	0	0	0	0	0	0	0	0	0	0	0	0	0	0	0	0	0	0	0	0	0	0
	Popliteal Artery Entrapment Syndrome (PAES)	0	1	0	1	0	0	0	0	0	0	1	0	1	0	0	0	0	0	0	0	0	0	0	0	0	1	0	0	1	0	1	0	1	0	0	0	0	0	0	0	0	0	0	0	1	0	0	0
	Superficial Peroneal nerve entrapment (SPNE)	0	1	0	1	0	0	0	0	0	0	0	0	1	0	0	0	0	0	0	0	0	0	0	0	0	1	0	0	1	0	0	0	1	0	1	1	1	1	0	0	0	0	0	0	0	0	0	0
	Tibial stress fracture (Tibial SF)	0	1	1	0	0	0	0	0	0	0	0	0	0	0	0	0	0	1	0	0	0	0	0	0	0	0	1	0	0	0	0	0	0	0	0	0	0	0	0	0	0	0	0	0	0	0	0	0
	Popliteal Artery Entrapment Syndrome (PAES)	0	0	0	1	0	0	0	0	0	0	1	0	1	0	0	0	0	0	1	0	0	0	0	0	0	1	0	0	0	0	0	1	0	0	0	0	0	0	0	1	0	0	0	0	0	0	0	0
	Chronic Exertional Compartment Syndrome (CECS)	0	0	0	0	0	0	0	0	0	0	0	0	0	0	0	0	0	0	0	0	0	0	0	0	0	0	0	0	0	0	0	0	0	0	0	0	0	0	0	0	0	0	0	0	0	0	0	0
	Medial Tibial Stress Syndrome (MTSS)	0	0	0	1	0	0	0	0	0	0	1	0	0	1	0	0	0	0	0	1	0	0	0	0	0	1	0	0	0	0	0	0	0	0	0	0	0	0	0	0	0	0	0	0	0	0	0	0
	Chronic Exertional Compartment Syndrome (CECS)	0	0	0	0	0	0	0	0	0	0	0	0	0	0	0	0	0	0	0	0	0	0	0	0	0	0	0	0	0	0	0	0	0	0	0	0	0	0	0	0	0	0	0	0	0	0	0	0
	Popliteal Artery Entrapment Syndrome (PAES)	0	0	0	1	0	0	0	0	0	0	1	0	0	0	0	1	0	0	0	0	0	0	0	0	0	1	0	1	0	0	0	1	0	0	0	1	0	0	0	0	0	1	0	0	1	0	0	0
	Popliteal Artery Entrapment Syndrome (PAES)	0	1	0	1	0	0	0	0	0	0	0	0	0	0	0	0	0	0	0	0	0	0	0	0	0	0	0	0	0	0	0	0	0	0	0	0	0	0	0	0	0	0	0	0	0	0	0	0
	Chronic Exertional Compartment Syndrome (CECS)	0	0	0	1	0	0	0	0	0	0	1	0	1	0	0	0	0	0	0	0	0	0	0	0	0	1	0	0	0	0	0	1	0	0	0	0	1	0	0	0	0	0	0	0	0	0	0	0
	Chronic Exertional Compartment Syndrome (CECS)	0	1	0	1	0	0	0	0	0	0	1	0	1	0	0	0	0	0	0	0	0	0	0	0	0	1	0	0	0	0	0	0	0	0	0	0	1	0	1	0	0	1	0	0	0	0	0	0
	Popliteal Artery Entrapment Syndrome (PAES)	0	0	0	0	0	0	0	0	0	0	0	0	0	0	0	0	0	0	0	0	0	0	0	0	0	1	0	0	0	0	0	0	0	0	0	0	0	0	0	0	0	0	0	0	1	0	0	0
	Chronic Exertional Compartment Syndrome (CECS)	0	0	0	1	0	0	0	0	0	0	1	0	1	0	0	0	0	0	0	0	0	0	0	0	0	1	0	0	0	0	0	0	1	0	0	0	1	1	0	0	1	0	0	0	0	0	0	0
	Chronic Exertional Compartment Syndrome (CECS)	0	1	1	1	0	0	0	0	0	0	1	0	1	0	0	0	0	0	0	0	1	0	0	0	0	1	0	0	0	0	0	1	1	0	0	0	0	0	0	0	1	0	0	0	0	0	0	0
	Chronic Exertional Compartment Syndrome (CECS)	0	0	0	1	0	0	0	0	0	0	1	0	1	0	0	0	0	0	0	0	0	0	0	0	0	1	0	0	0	0	0	1	0	0	0	0	0	0	0	0	0	0	0	0	0	0	0	0
	Tibial stress fracture (Tibial SF)	0	0	1	0	0	1	0	0	0	0	1	0	0	1	1	0	0	0	1	0	0	0	0	0	0	0	0	0	0	0	0	0	0	0	0	0	0	0	0	0	0	0	0	0	0	0	0	0
	Accessory low lying soleus muscle (ALLSM) (ASM)	0	0	1	1	0	0	1	0	0	0	0	0	0	0	0	0	0	0	1	0	0	1	0	0	0	0	0	0	0	0	0	0	0	0	0	1	0	0	0	0	0	0	0	0	0	0	0	0
	Medial Tibial Stress Syndrome (MTSS)	0	0	0	1	0	0	0	0	0	0	1	0	0	1	1	0	0	0	0	1	0	0	0	0	0	1	0	0	0	0	0	0	0	0	0	0	0	0	0	0	0	0	0	0	0	0	0	0
	Tibial stress fracture (Tibial SF)	0	0	0	1	0	1	0	0	0	0	1	0	0	0	0	1	0	1	1	0	0	0	0	0	0	1	0	0	0	0	0	0	0	0	0	0	0	0	0	0	0	0	0	0	0	0	0	0
	Chronic Exertional Compartment Syndrome (CECS)	0	0	0	1	0	0	0	0	0	0	1	1	1	0	0	0	0	0	0	0	1	0	0	0	0	1	0	0	0	0	0	1	1	0	0	0	1	0	0	0	1	1	0	0	0	0	0	0
	Popliteal Artery Entrapment Syndrome (PAES)	0	0	0	0	0	0	0	0	0	0	0	0	0	0	0	0	0	0	0	0	0	0	0	0	0	0	0	0	0	0	0	1	0	0	0	0	0	0	0	0	0	0	0	0	1	0	0	0
	Superficial Peroneal nerve entrapment (SPNE)	0	0	0	1	1	1	0	0	0	0	1	0	0	0	0	0	0	0	0	0	0	0	0	0	0	0	0	0	0	0	0	1	1	0	0	0	0	0	0	0	0	0	0	0	0	0	0	0
	Chronic Exertional Compartment Syndrome (CECS)	0	0	0	1	0	0	0	0	0	0	1	0	1	0	0	0	0	0	0	0	0	0	0	0	0	0	0	0	0	0	0	0	0	0	0	0	0	1	1	0	0	0	0	1	0	0	0	0
	Tibial stress fracture (Tibial SF)	0	0	0	0	0	0	0	0	0	0	1	0	0	0	0	0	0	0	0	0	0	0	0	0	0	0	0	0	0	0	0	0	0	0	0	0	0	0	0	0	0	0	0	0	0	0	0	0
	Tibial stress fracture (Tibial SF)	0	0	1	0	0	1	0	0	1	0	1	0	0	0	0	1	0	0	1	0	0	1	0	0	0	1	0	0	0	0	0	0	0	0	0	0	0	0	0	0	0	0	0	0	0	0	0	0
	Chronic Exertional Compartment Syndrome (CECS)	0	0	0	1	0	0	0	0	0	0	1	0	1	0	0	0	0	0	0	0	0	0	0	0	0	1	0	0	0	0	0	1	1	0	0	0	1	0	0	0	1	0	0	0	0	0	0	0
	Accessory low lying soleus muscle (ALLSM) (ASM)	0	1	1	0	1	0	1	0	0	0	0	0	0	0	0	0	0	0	0	0	0	0	0	0	0	1	0	0	0	0	0	0	0	0	0	0	0	0	0	0	0	0	0	0	0	0	0	0
	Chronic Exertional Compartment Syndrome (CECS)	0	0	0	1	0	0	0	0	0	0	1	0	1	0	0	0	0	0	0	0	0	0	0	0	0	1	0	0	0	0	0	0	0	0	0	0	0	0	0	0	1	0	0	0	0	0	0	0
	Superficial Peroneal nerve entrapment (SPNE)	0	1	1	0	0	0	0	0	0	1	0	0	0	0	0	0	0	0	0	0	0	0	0	0	0	0	0	0	0	0	0	0	1	0	0	0	0	0	0	0	0	0	0	0	0	0	0	0
	Popliteal Artery Entrapment Syndrome (PAES)	0	0	0	1	0	0	1	0	0	0	0	0	0	0	0	0	0	0	0	0	0	0	0	0	0	0	0	0	0	0	0	0	0	0	0	0	0	0	0	0	0	1	0	0	0	0	0	0
	Chronic Exertional Compartment Syndrome (CECS)	0	0	0	1	0	0	1	0	0	0	1	0	1	0	0	0	0	0	0	0	0	0	0	0	0	1	0	0	0	0	0	1	0	0	0	0	0	0	0	0	0	0	0	0	0	0	0	0
	Medial Tibial Stress Syndrome (MTSS)	0	0	0	0	0	0	0	0	0	0	0	0	0	0	0	0	0	0	0	1	0	0	0	0	0	1	0	0	0	0	0	0	0	0	0	0	0	0	0	0	0	0	0	0	0	0	0	0
	Chronic Exertional Compartment Syndrome (CECS)	0	0	0	0	0	0	1	0	0	0	1	0	1	0	0	0	0	0	0	0	1	0	0	0	0	1	0	0	0	0	0	1	0	0	0	0	1	0	0	0	0	0	0	0	0	0	0	0
	Tibial stress fracture (Tibial SF)	1	0	0	0	0	0	1	0	1	0	0	0	0	0	0	1	0	1	1	0	0	1	0	0	0	1	0	0	0	0	0	0	0	0	0	0	0	0	0	0	0	0	0	0	0	0	0	0
	Popliteal Artery Entrapment Syndrome (PAES)	0	0	0	0	0	0	0	0	0	0	0	0	0	0	0	0	0	0	0	0	0	0	0	0	0	0	1	0	0	0	0	0	0	0	0	0	0	0	0	0	0	1	0	0	1	0	0	0
	Superficial Peroneal nerve entrapment (SPNE)	1	0	0	1	0	0	0	0	0	0	1	0	0	0	0	0	0	0	0	0	0	0	0	0	0	0	0	0	0	0	0	1	0	0	1	1	0	0	0	0	0	0	0	0	0	0	0	0
	Chronic Exertional Compartment Syndrome (CECS)	0	0	0	1	0	0	0	0	0	0	1	0	1	0	0	0	0	0	0	0	1	0	0	0	0	1	0	0	0	0	0	0	1	0	0	0	0	0	0	0	1	0	0	0	0	0	0	0
	Tibial stress fracture (Tibial SF)	0	0	0	1	0	0	1	0	1	0	0	0	0	0	0	0	0	0	1	0	0	0	0	0	0	0	1	0	0	0	0	0	0	0	0	0	0	0	0	0	0	0	0	0	0	0	0	0
	Medial Tibial Stress Syndrome (MTSS)	0	0	0	1	0	0	1	0	0	0	1	0	0	1	0	0	0	0	0	1	0	0	0	0	0	1	0	0	0	0	0	0	0	0	0	0	0	0	0	0	0	0	0	0	0	0	0	0
	Popliteal Artery Entrapment Syndrome (PAES)	0	0	0	1	0	0	0	0	0	0	0	0	0	0	0	0	0	0	0	0	0	0	0	0	0	1	0	0	0	0	0	1	1	0	1	0	0	0	0	0	0	0	0	0	1	0	0	0
	Superficial Peroneal nerve entrapment (SPNE)	0	0	0	0	0	0	0	0	0	0	0	0	0	0	0	0	0	0	0	0	0	0	0	0	0	0	0	0	0	0	0	0	0	0	0	0	1	1	0	0	0	0	0	0	0	0	0	0
	Radiculopathy/ sciatica	0	0	0	0	1	0	1	0	0	0	1	0	0	0	0	0	0	0	0	0	0	0	0	0	0	1	1	1	1	1	0	0	1	1	0	1	1	0	0	0	0	0	0	0	0	0	0	0
	Saphenous entrapment syndrome	0	0	0	0	0	0	0	0	0	0	0	0	0	0	0	0	0	0	0	0	0	0	0	0	0	0	1	1	0	0	0	0	0	0	0	0	0	1	0	0	0	0	0	0	0	0	0	0
	Medial Tibial Stress Syndrome (MTSS)	0	0	0	0	0	0	0	0	0	0	1	0	0	1	0	0	0	0	0	1	0	0	0	0	0	1	0	0	0	0	0	0	0	0	0	0	0	0	0	0	0	0	0	0	0	0	0	0
	Tibial stress fracture (Tibial SF)	0	0	0	0	0	0	1	0	1	0	1	0	0	0	0	1	0	0	1	0	0	1	0	0	0	1	0	0	0	0	0	0	0	0	0	0	0	0	0	0	0	0	0	0	0	0	0	0
	Chronic Exertional Compartment Syndrome (CECS)	0	0	0	1	0	0	0	0	0	0	1	0	1	0	0	0	0	0	0	0	0	0	0	0	0	1	0	0	0	0	0	0	0	0	0	1	0	0	0	0	1	1	0	0	0	0	0	0
	Popliteal Artery Entrapment Syndrome (PAES)	0	1	0	0	0	0	0	1	1	0	1	0	0	0	0	0	0	0	0	0	0	0	0	0	0	0	1	0	0	0	0	0	1	0	0	0	0	0	0	1	0	0	0	0	0	0	0	0
	Medial Tibial Stress Syndrome (MTSS)	0	1	0	0	0	0	0	1	0	0	1	0	0	1	0	0	0	0	0	1	0	0	0	0	0	0	1	0	0	0	0	0	0	0	0	0	0	0	0	0	0	0	0	0	0	0	0	0
	Chronic Exertional Compartment Syndrome (CECS)	0	1	1	1	0	0	0	0	0	0	1	0	1	0	0	0	0	0	0	0	1	0	0	0	0	1	0	0	0	0	0	1	0	0	0	0	1	1	1	0	1	1	0	0	0	0	0	0
	Superficial Peroneal nerve entrapment (SPNE)	0	0	0	0	0	0	0	0	0	0	0	0	0	0	0	0	0	0	0	0	0	0	0	0	0	0	1	1	1	0	0	0	1	1	0	0	1	1	0	0	0	0	0	0	0	0	0	0
	Radiculopathy/ sciatica	0	0	0	0	0	0	0	0	0	0	0	0	0	0	0	0	0	0	0	0	0	0	0	0	0	0	1	1	1	1	0	0	0	0	0	0	1	1	1	0	0	0	0	0	0	0	0	0
	Tibial stress fracture (Tibial SF)	0	0	0	0	1	0	0	0	1	0	1	0	0	0	0	0	0	0	0	1	0	1	0	0	0	1	0	0	0	0	0	0	0	0	0	0	0	0	0	0	0	0	0	0	0	0	0	0
	Chronic Exertional Compartment Syndrome (CECS)	0	0	0	1	0	0	1	0	0	0	1	0	1	0	0	0	0	0	0	0	1	0	0	0	0	1	0	0	0	0	0	0	0	0	0	1	0	0	0	0	1	1	0	0	0	0	0	0
	Chronic Exertional Compartment Syndrome (CECS)	0	0	0	1	0	0	1	0	1	0	1	0	1	0	0	0	0	0	0	0	0	0	0	0	0	1	0	0	0	0	0	1	0	0	0	0	0	0	0	0	0	0	0	0	0	1	0	0
	Popliteal Artery Entrapment Syndrome (PAES)	0	0	0	0	0	0	1	0	0	0	1	0	0	0	0	1	0	0	0	0	0	0	0	0	0	0	0	0	0	0	1	1	1	0	0	0	1	0	0	0	0	0	0	0	0	0	0	0
	Chronic Exertional Compartment Syndrome (CECS)	0	0	1	1	0	0	1	0	0	0	1	0	1	0	0	0	0	0	0	0	1	0	0	0	0	1	0	0	0	0	0	1	0	0	0	1	1	0	0	0	0	0	0	0	0	0	0	0
	Tibial stress fracture (Tibial SF)	0	0	0	0	0	0	0	0	0	0	0	0	0	0	0	0	0	0	1	0	0	1	0	0	0	1	0	0	0	0	0	0	0	0	0	0	0	0	0	0	0	0	0	0	0	0	0	0
	Chronic Exertional Compartment Syndrome (CECS)	0	0	0	1	0	0	1	0	0	0	1	0	1	0	0	0	0	0	0	0	1	0	0	0	0	0	0	0	0	0	0	0	0	0	0	0	0	0	0	0	1	1	0	0	0	0	0	0
	Radiculopathy/ sciatica	0	0	0	0	0	0	0	0	0	0	0	0	0	0	0	0	0	0	0	0	0	0	1	1	0	1	1	1	1	1	0	1	0	0	0	1	0	0	0	0	0	0	0	0	0	0	0	0
	Chronic Exertional Compartment Syndrome (CECS)	0	0	0	1	0	0	1	0	0	0	1	0	1	0	0	0	0	0	0	0	0	0	0	0	0	1	0	0	0	0	0	0	0	0	0	1	0	0	0	0	0	1	0	0	0	0	0	0
	Tibial stress fracture (Tibial SF)	0	0	0	0	0	1	0	0	1	0	1	0	0	0	0	0	0	0	1	0	0	1	0	0	0	1	0	0	0	0	0	0	0	0	0	0	0	0	0	0	0	0	0	0	0	0	0	0
	fibular stress fracture	0	0	0	0	0	1	0	0	1	0	1	0	0	0	0	0	0	0	1	0	0	1	0	0	0	1	0	0	0	0	0	0	0	0	0	0	0	0	0	0	0	0	0	0	0	0	0	0
	Chronic Exertional Compartment Syndrome (CECS)	0	0	1	1	0	0	1	0	0	0	1	0	1	0	0	0	0	0	0	0	0	0	0	0	0	1	0	0	0	0	0	1	0	0	0	0	0	0	0	0	1	1	0	0	0	0	0	0
	Medial Tibial Stress Syndrome (MTSS)	0	0	0	1	0	0	0	0	0	0	1	0	0	1	0	0	0	0	0	1	0	0	0	0	0	1	0	0	0	0	0	0	0	0	0	0	0	0	0	0	0	0	0	0	0	0	0	0
	Medial Tibial Stress Syndrome (MTSS)	0	0	0	1	0	1	0	0	0	0	1	0	0	1	0	0	0	0	0	1	0	0	0	0	0	0	0	0	0	0	0	0	0	0	0	0	0	0	0	0	1	0	0	0	0	0	0	0
	Popliteal Artery Entrapment Syndrome (PAES)	0	1	0	1	0	0	0	0	0	0	1	0	0	0	0	0	0	0	0	0	0	0	0	0	0	1	0	0	0	0	0	0	0	0	0	0	0	0	0	0	0	0	0	0	0	0	0	0
	McArdle syndrome	0	0	0	1	0	0	0	0	0	0	0	0	0	0	0	0	0	0	0	0	0	0	0	0	1	1	0	0	0	0	0	0	0	0	0	0	0	0	0	0	0	0	1	0	0	0	1	0
	Chronic Exertional Compartment Syndrome (CECS)	0	0	0	1	0	0	0	0	0	0	1	0	1	0	0	0	0	0	0	0	1	0	0	0	0	1	0	0	0	0	0	1	1	0	0	0	0	0	0	0	0	0	0	0	0	0	0	0
	Tibial stress fracture (Tibial SF)	0	0	0	0	0	0	0	0	1	0	0	0	0	0	0	0	0	0	0	0	0	1	0	0	0	1	0	0	0	0	0	0	0	0	0	0	0	0	0	0	0	0	0	0	0	0	0	0
	Superficial Peroneal nerve entrapment (SPNE)	0	0	1	0	1	0	1	0	0	0	0	0	0	0	0	0	1	0	0	0	0	0	0	0	0	0	1	0	0	0	0	1	1	0	1	0	0	0	0	0	0	0	0	0	0	0	0	0
	Chronic Exertional Compartment Syndrome (CECS)	0	0	0	1	0	0	1	0	0	0	1	0	1	0	0	0	0	0	0	0	0	0	0	0	0	0	0	0	0	0	0	0	1	0	0	0	0	0	1	0	1	0	0	1	0	0	0	0
	Tibial stress fracture (Tibial SF)	0	1	1	1	0	0	0	0	0	0	0	0	0	0	0	0	0	0	0	0	0	1	0	0	0	1	0	0	0	0	0	0	0	0	0	0	0	0	0	0	0	0	0	0	0	0	0	0
	Tibial stress fracture (Tibial SF)	0	0	0	0	0	0	0	0	0	0	1	0	0	0	1	0	0	0	1	0	0	1	0	0	0	1	0	0	0	0	0	0	0	0	0	0	0	0	0	0	0	0	0	0	0	0	0	0
	Chronic Exertional Compartment Syndrome (CECS)	0	0	0	1	0	0	1	0	1	0	1	0	1	0	0	0	0	0	0	0	1	0	0	0	0	1	1	0	0	0	0	0	1	0	1	0	0	0	0	0	1	0	0	1	0	0	0	0
	McArdle syndrome	0	0	0	1	0	0	1	0	0	0	0	0	0	0	0	0	0	0	0	0	0	0	0	0	1	0	0	0	0	0	0	0	0	0	0	0	1	0	0	0	1	1	0	0	0	0	1	1
	Chronic Exertional Compartment Syndrome (CECS)	0	0	0	1	0	0	1	0	0	0	1	0	1	0	0	0	0	0	0	0	0	0	0	0	0	0	0	0	0	0	0	0	1	0	0	0	0	0	1	0	1	0	0	1	0	0	0	0
	Medial Tibial Stress Syndrome (MTSS)	0	0	0	1	0	0	0	0	0	0	0	0	0	1	0	0	0	0	0	1	0	0	0	0	0	1	0	0	0	0	0	0	0	0	0	0	0	0	0	0	0	0	0	0	0	0	0	0
	Chronic Exertional Compartment Syndrome (CECS)	0	1	0	1	0	0	0	0	0	0	1	0	1	0	0	0	0	0	0	0	0	0	0	0	0	1	0	0	0	0	0	0	0	0	0	0	1	0	0	0	1	1	0	0	0	0	0	0
	Medial Tibial Stress Syndrome (MTSS)	0	1	0	1	0	0	0	0	0	0	1	0	0	1	0	0	0	0	0	1	0	0	0	0	0	1	0	0	0	0	0	0	0	0	0	0	0	0	0	0	0	0	0	0	0	0	0	0
	Tibial stress fracture (Tibial SF)	0	0	0	1	0	0	0	0	0	0	1	0	0	0	0	1	0	0	1	0	0	0	0	0	0	1	0	0	0	0	0	0	0	0	0	0	0	0	0	0	0	0	0	0	0	0	0	0
	Popliteal Artery Entrapment Syndrome (PAES)	0	1	0	1	0	0	0	0	0	0	1	0	1	0	0	0	0	0	0	0	0	0	0	0	0	1	0	0	1	0	1	0	1	0	0	0	0	0	0	0	0	0	0	0	0	0	0	0
	Superficial Peroneal nerve entrapment (SPNE)	0	1	0	1	0	0	0	0	0	0	0	0	1	0	0	0	0	0	0	0	0	0	0	0	0	1	0	0	1	0	0	0	1	0	1	1	1	1	0	0	0	0	0	0	0	0	0	0
	Tibial stress fracture (Tibial SF)	0	0	1	0	0	1	0	0	1	0	1	0	0	0	0	1	0	0	1	0	0	1	0	0	0	1	0	0	0	0	0	0	0	0	0	0	0	0	0	0	0	0	0	0	0	0	0	0
	Chronic Exertional Compartment Syndrome (CECS)	0	0	1	1	0	0	1	0	0	0	1	0	1	0	0	0	0	0	0	0	0	0	0	0	0	1	0	0	0	0	0	1	0	0	0	0	0	0	0	0	1	1	0	0	0	0	0	0
	Tibial stress fracture (Tibial SF)	0	0	0	1	0	0	0	0	0	0	1	1	1	0	0	0	0	0	1	0	0	0	0	0	0	1	1	0	0	0	0	0	0	0	0	0	0	0	0	0	0	0	0	0	0	0	0	0
	Chronic Exertional Compartment Syndrome (CECS)	1	0	0	1	0	0	0	0	0	0	1	0	0	0	0	0	0	0	0	0	0	0	0	0	0	1	0	0	0	0	0	2	0	0	0	0	0	0	0	0	0	0	0	0	0	0	0	0
	Tibial stress fracture (Tibial SF)	0	0	0	0	0	0	0	0	0	0	0	0	0	0	0	0	0	0	1	0	0	1	0	0	0	1	0	0	0	0	0	0	0	0	0	0	0	0	0	0	0	0	0	0	0	0	0	0
	Medial Tibial Stress Syndrome (MTSS)	0	0	0	0	0	0	0	0	0	0	0	0	0	0	0	0	0	0	0	1	0	0	0	0	0	1	0	0	0	0	0	0	0	0	0	0	0	0	0	0	0	0	0	0	0	0	0	0
	Chronic Exertional Compartment Syndrome (CECS)	0	1	0	1	0	0	0	0	0	0	1	0	1	0	0	0	0	0	0	0	0	0	0	0	0	1	0	0	0	0	0	0	0	0	0	0	1	0	0	0	1	1	0	0	0	0	0	0
	Medial Tibial Stress Syndrome (MTSS)	0	1	0	1	0	0	0	0	0	0	1	0	0	1	0	0	0	0	0	1	0	0	0	0	0	1	0	0	0	0	0	0	0	0	0	0	0	0	0	0	0	0	0	0	0	0	0	0
	Tibial stress fracture (Tibial SF)	0	0	0	1	0	0	0	0	0	0	1	0	0	0	0	1	0	0	1	0	0	0	0	0	0	1	0	0	0	0	0	0	0	0	0	0	0	0	0	0	0	0	0	0	0	0	0	0
	Popliteal Artery Entrapment Syndrome (PAES)	0	1	0	1	0	0	0	0	0	0	1	0	1	0	0	0	0	0	0	0	0	0	0	0	0	1	0	0	1	0	1	0	1	0	0	0	0	0	0	0	0	0	0	0	0	0	0	0
	Superficial Peroneal nerve entrapment (SPNE)	0	1	0	1	0	0	0	0	0	0	1	0	0	0	0	0	0	0	0	0	0	0	0	0	0	1	0	0	0	0	0	0	1	0	1	0	0	0	1	0	0	0	0	0	0	0	0	0
	Radiculopathy/ sciatica	0	1	0	0	0	0	0	0	0	0	0	0	0	0	0	0	0	0	0	0	0	0	0	0	0	0	1	1	1	1	0	0	0	0	0	0	0	0	1	0	0	0	0	0	0	0	0	0
	Myofascial tears	0	0	0	1	0	0	0	1	0	0	0	0	0	0	0	0	0	0	0	0	0	0	0	0	0	1	0	0	1	0	0	0	0	0	0	0	0	0	0	0	0	0	0	0	0	0	0	0
	Tibial stress fracture (Tibial SF)	0	0	1	0	0	1	0	0	0	0	1	0	0	1	1	0	0	0	1	0	0	0	0	0	0	1	1	0	0	0	0	0	0	0	0	0	0	0	0	0	0	0	0	1	0	0	0	0
	Tibial stress fracture (Tibial SF)	0	1	1	1	0	0	0	0	0	0	0	0	0	0	0	0	0	0	0	0	0	1	0	0	0	1	0	0	0	0	0	0	0	0	0	0	0	0	0	0	0	0	0	0	0	0	0	0
	Chronic Exertional Compartment Syndrome (CECS)	0	0	0	1	0	0	0	0	0	0	1	0	1	0	0	0	0	0	0	0	1	0	0	0	0	1	0	0	0	0	0	0	1	0	0	0	0	0	0	0	1	0	0	0	0	0	0	0
	Tibial stress fracture (Tibial SF)	0	0	0	1	0	0	1	0	1	0	0	0	0	0	0	0	0	0	1	0	0	0	0	0	0	0	1	0	0	0	0	0	0	0	0	0	0	0	0	0	0	0	0	0	0	0	0	0
	Medial Tibial Stress Syndrome (MTSS)	0	0	0	1	0	0	1	0	0	0	1	0	0	1	0	0	0	0	0	1	0	0	0	0	0	1	0	0	0	0	0	0	0	0	0	0	0	0	0	0	0	0	0	0	0	0	0	0
	Popliteal Artery Entrapment Syndrome (PAES)	0	0	0	1	0	0	1	0	0	0	0	0	0	0	0	0	0	0	0	0	0	0	0	0	0	0	0	0	0	0	0	1	0	0	0	0	0	0	0	1	0	1	0	0	1	0	0	0
	Accessory low lying soleus muscle (ALLSM) (ASM)	0	0	0	0	0	0	0	1	0	0	0	0	0	0	0	0	0	0	0	0	0	0	0	0	0	0	0	0	0	0	0	0	0	0	0	0	0	0	0	0	0	0	0	0	0	0	0	0
	Myofascial tears	0	0	0	0	1	0	0	1	0	0	0	0	0	0	0	0	0	0	0	0	0	0	0	0	0	1	0	0	1	0	0	1	1	0	0	0	0	0	0	0	0	0	0	0	0	0	0	0
	Chronic Exertional Compartment Syndrome (CECS)	0	0	0	1	0	0	0	0	0	0	0	0	0	0	0	0	0	0	0	0	0	0	0	0	0	1	0	0	0	0	0	0	0	0	0	0	0	0	0	0	0	0	0	0	0	0	0	0
	Tibial stress fracture (Tibial SF)	0	0	0	1	0	1	0	0	0	0	1	0	0	0	0	1	0	1	1	0	0	0	0	0	0	1	0	0	0	0	0	0	0	0	0	0	0	0	0	0	0	0	0	0	0	0	0	0
	Accessory low lying soleus muscle (ALLSM) (ASM)	0	0	0	1	0	0	0	0	0	0	0	0	0	0	0	0	1	0	0	0	0	0	0	0	0	1	0	0	0	0	0	0	0	0	0	0	0	0	0	0	0	0	0	1	0	0	0	0
	Chronic Exertional Compartment Syndrome (CECS)	0	0	0	1	0	0	1	0	0	0	1	0	1	0	0	0	0	0	0	0	0	0	0	0	0	1	0	0	0	0	0	1	0	0	0	0	1	0	0	0	0	0	0	0	0	0	0	0
	Chronic Exertional Compartment Syndrome (CECS)	0	0	0	1	0	0	1	0	0	0	1	0	1	0	0	0	0	0	0	0	0	0	0	0	0	1	0	0	0	0	0	1	0	0	0	0	1	0	0	0	0	0	0	0	0	0	0	0
	Chronic Exertional Compartment Syndrome (CECS)	0	0	0	1	0	0	0	0	1	0	0	1	0	0	0	0	0	0	0	0	0	0	0	0	0	1	0	0	0	0	0	1	0	0	0	0	0	0	1	0	1	0	0	1	0	0	0	0
	Chronic Exertional Compartment Syndrome (CECS)	0	0	0	1	0	0	0	0	1	0	0	1	0	0	0	0	0	0	0	0	0	0	0	0	0	1	1	0	0	0	0	1	0	0	1	0	1	1	0	0	1	1	1	1	0	0	0	0
	Tibial stress fracture (Tibial SF)	0	1	1	0	0	0	0	1	0	0	0	0	0	0	0	0	0	1	0	0	0	0	0	0	0	0	1	0	0	0	0	0	0	0	0	0	0	0	0	0	0	0	0	0	0	0	0	0
	Tibial stress fracture (Tibial SF)	0	0	0	1	0	0	0	0	0	0	0	0	0	0	0	0	0	0	1	0	0	1	0	0	0	1	0	0	0	0	0	0	0	0	0	0	0	0	0	0	0	0	0	0	0	0	0	0
	Chronic Exertional Compartment Syndrome (CECS)	0	0	0	0	0	0	0	0	0	0	0	0	0	0	0	0	0	0	0	0	0	0	0	0	0	0	0	0	0	0	0	0	0	0	0	0	0	0	0	0	0	0	0	0	0	0	0	0
	Popliteal Artery Entrapment Syndrome (PAES)	0	1	0	1	0	0	0	0	0	0	1	0	0	0	0	0	0	0	0	0	0	0	0	0	0	1	0	0	0	0	0	0	1	0	0	0	0	0	0	0	0	1	0	0	0	0	0	0
	Chronic Exertional Compartment Syndrome (CECS)	0	0	0	1	0	0	0	0	0	0	1	1	1	0	0	0	0	0	0	0	1	0	0	0	0	1	0	0	0	0	0	1	1	0	0	0	0	0	0	0	1	1	0	0	0	0	0	0
	Superficial Peroneal nerve entrapment (SPNE)	0	0	0	1	0	1	0	0	0	0	0	0	0	0	0	0	0	0	0	0	0	0	0	0	0	0	0	0	0	0	0	1	1	1	0	0	1	1	1	0	0	0	0	0	0	0	0	0
	Superficial Peroneal nerve entrapment (SPNE)	0	0	0	1	0	0	1	0	0	0	1	0	0	0	0	0	0	0	0	0	1	0	0	0	1	1	0	0	1	0	0	0	1	0	0	1	1	0	0	0	0	0	0	0	0	0	0	0
	Chronic Exertional Compartment Syndrome (CECS)	0	0	0	0	0	0	0	0	0	0	0	0	0	0	0	0	0	0	0	0	0	0	0	0	0	1	0	0	0	0	0	0	0	0	0	0	0	0	0	0	0	0	0	0	0	0	0	0
	Medial Tibial Stress Syndrome (MTSS)	0	0	0	0	0	0	0	0	0	0	0	0	0	0	0	0	0	0	0	1	0	0	0	0	0	1	0	0	0	0	0	0	0	0	0	0	0	0	0	0	0	0	0	0	0	0	0	0
	Superficial Peroneal nerve entrapment (SPNE)	0	0	0	0	0	0	0	0	0	0	0	0	0	0	0	0	0	0	0	0	0	0	0	0	0	0	0	0	0	0	0	1	0	0	0	0	0	0	0	0	0	0	0	0	0	0	0	0
	Tibial stress fracture (Tibial SF)	1	0	1	0	0	0	0	0	0	0	1	0	0	0	0	0	0	0	0	0	0	0	0	0	0	1	0	0	0	0	0	0	0	0	0	0	0	0	0	0	0	0	0	0	0	0	0	0
	Chronic Exertional Compartment Syndrome (CECS)	0	0	0	1	0	0	0	0	0	0	1	0	1	0	0	0	0	0	0	0	0	0	0	0	0	0	0	0	0	0	0	0	0	0	0	0	0	1	1	0	0	0	0	1	0	0	0	0
	Chronic Exertional Compartment Syndrome (CECS)	0	0	0	1	0	0	0	0	0	0	1	0	1	0	0	0	0	0	0	0	0	0	0	0	0	0	0	0	0	0	0	0	0	0	0	0	0	1	1	0	0	0	0	1	0	0	0	0
	Accessory low lying soleus muscle (ALLSM) (ASM)	0	0	1	1	0	0	1	0	0	0	0	0	0	0	0	0	0	0	1	0	0	1	0	0	0	0	0	0	0	0	0	0	0	0	0	1	0	0	0	0	0	0	0	0	0	0	0	0
	Tibial stress fracture (Tibial SF)	0	0	0	1	0	0	1	0	1	0	0	0	0	0	0	0	0	0	1	0	0	0	0	0	0	0	1	0	0	0	0	0	0	0	0	0	0	0	0	0	0	0	0	0	0	0	0	0
	Medial Tibial Stress Syndrome (MTSS)	0	0	0	1	0	0	1	0	0	0	1	0	0	1	0	0	0	0	0	1	0	0	0	0	0	1	0	0	0	0	0	0	0	0	0	0	0	0	0	0	0	0	0	0	0	0	0	0
	Superficial Peroneal nerve entrapment (SPNE)	0	1	0	1	0	0	0	0	0	0	0	0	0	0	0	0	0	0	0	0	0	0	0	0	0	1	0	0	0	0	0	0	0	0	0	0	0	0	0	0	0	0	0	1	0	0	0	0
	Chronic Exertional Compartment Syndrome (CECS)	0	0	0	1	0	0	0	0	1	0	0	1	0	0	0	0	0	0	0	0	0	0	0	0	0	1	0	0	0	0	0	1	0	0	0	0	0	0	1	0	1	0	0	1	0	0	0	0
	Popliteal Artery Entrapment Syndrome (PAES)	0	0	0	1	0	0	0	0	0	0	0	1	0	0	0	0	0	0	0	0	0	0	0	0	0	1	0	0	0	0	0	0	0	0	0	0	0	0	0	0	0	0	0	0	0	0	0	0
	Chronic Exertional Compartment Syndrome (CECS)	0	0	0	1	0	0	0	0	1	0	0	1	0	0	0	0	0	0	0	0	0	0	0	0	0	1	1	0	0	0	0	1	0	0	1	0	1	1	0	0	1	1	1	1	0	0	0	0
	Tibial stress fracture (Tibial SF)	0	0	0	1	0	0	0	0	0	0	0	0	0	0	0	0	0	0	1	0	0	1	0	0	0	1	0	0	0	0	0	0	0	0	0	0	0	0	0	0	0	0	0	0	0	0	0	0
	Medial Tibial Stress Syndrome (MTSS)	0	0	0	1	0	0	0	0	0	0	0	0	0	1	0	0	0	0	0	1	0	0	0	0	0	1	0	0	0	0	0	0	0	0	0	0	0	0	0	0	0	0	0	0	0	0	0	0
	Chronic Exertional Compartment Syndrome (CECS)	0	0	0	1	0	0	0	0	0	0	1	0	1	0	0	0	0	0	0	0	0	0	0	0	0	0	0	0	0	0	0	0	0	0	0	0	0	1	1	0	0	0	0	1	0	0	0	0
	Popliteal Artery Entrapment Syndrome (PAES)	0	0	0	1	0	0	0	0	0	0	0	1	0	0	0	0	0	0	0	0	0	0	0	0	0	1	0	0	0	0	0	0	0	0	0	0	0	0	0	0	0	0	0	0	0	0	0	0
	Chronic Exertional Compartment Syndrome (CECS)	0	1	0	1	0	0	0	0	0	0	1	0	1	0	0	0	0	0	0	0	0	0	0	0	0	1	0	0	0	0	0	1	0	0	0	0	1	0	0	0	1	1	0	0	0	0	0	0
	Medial Tibial Stress Syndrome (MTSS)	0	1	0	0	0	0	0	1	0	0	1	0	0	1	0	0	0	0	0	1	0	0	0	0	0	0	1	0	0	0	0	0	0	0	0	0	1	0	0	0	0	0	0	0	0	0	0	0
	Medial Tibial Stress Syndrome (MTSS)	0	1	0	1	0	0	0	0	0	0	1	0	0	1	0	0	0	0	0	1	0	0	0	0	0	1	0	0	0	0	0	0	0	0	0	0	0	0	0	0	0	0	0	0	0	0	0	0
	Chronic Exertional Compartment Syndrome (CECS)	0	0	0	0	0	0	1	0	0	0	1	0	1	0	0	0	0	0	0	0	1	0	0	0	0	1	0	0	0	0	0	1	0	0	0	0	1	0	0	0	0	0	0	0	0	0	0	0
	1
	Chronic Exertional Compartment Syndrome (CECS)	1	15	5	49	0	0	15	0	6	0	47	6	45	0	0	0	1	0	0	0	13	0	0	0	0	45	3	0	0	0	1	26	12	0	3	5	21	9	12	0	32	22	2	13	0	1	0	0
	Medial Tibial Stress Syndrome (MTSS)	0	8	0	15	0	1	3	2	0	0	16	0	1	17	1	0	0	0	0	21	0	1	0	0	0	18	2	0	0	0	0	0	0	0	0	1	1	0	0	0	1	0	0	0	0	0	0	0
	Tibial stress fracture (Tibial SF)	2	5	9	15	1	8	5	1	10	1	17	1	1	2	3	10	0	5	23	1	0	14	0	0	0	24	7	0	0	0	0	0	0	0	1	0	0	0	0	0	0	0	0	1	0	0	0	0
	Superficial Peroneal nerve entrapment (SPNE)	1	7	2	9	2	3	2	1	0	1	6	0	2	0	0	1	1	0	0	0	1	0	0	0	1	6	2	1	4	0	0	5	10	2	6	4	6	5	4	0	1	0	0	1	0	0	0	0
	Myofascial tears	0	0	0	1	2	1	0	3	0	0	0	0	0	0	0	0	0	0	0	0	0	0	0	0	0	2	1	0	2	0	0	1	1	0	0	0	1	0	0	0	0	0	0	1	0	0	0	0
	Radiculopathy/ sciatica	0	4	0	0	2	2	1	0	0	0	1	0	0	0	0	0	0	0	0	0	0	0	1	1	0	2	7	7	6	7	0	3	3	1	1	2	4	3	4	0	0	0	0	0	0	0	0	0
	Popliteal Artery Entrapment Syndrome (PAES)	0	11	0	17	0	1	3	1	1	1	10	2	5	0	0	2	0	0	1	0	0	0	0	0	0	13	2	1	3	1	4	9	7	0	1	1	2	0	0	4	1	7	0	0	11	1	0	0
	McArdle syndrome	0	0	0	2	0	0	1	0	0	0	0	0	0	0	0	0	0	0	0	0	0	0	0	0	2	1	0	0	0	0	0	0	0	0	0	0	1	0	0	0	1	1	1	0	0	0	2	1
	Accessory low lying soleus muscle (ALLSM) (ASM)	0	1	3	3	1	0	3	1	0	0	0	0	0	0	0	0	1	0	2	0	0	2	0	0	0	2	0	0	0	0	0	0	0	0	0	2	0	0	0	0	0	0	0	1	0	0	0	0
	>=0
	Chronic Exertional Compartment Syndrome (CECS)	59	59	59	59	59	59	59	59	59	59	59	59	59	59	59	59	59	59	59	59	59	59	59	59	59	59	59	59	59	59	59	59	59	59	59	59	59	59	59	59	59	59	59	59	59	59	59	59
	Medial Tibial Stress Syndrome (MTSS)	21	21	21	21	21	21	21	21	21	21	21	21	21	21	21	21	21	21	21	21	21	21	21	21	21	21	21	21	21	21	21	21	21	21	21	21	21	21	21	21	21	21	21	21	21	21	21	21
	Tibial stress fracture (Tibial SF)	31	31	31	31	31	31	31	31	31	31	31	31	31	31	31	31	31	31	31	31	31	31	31	31	31	31	31	31	31	31	31	31	31	31	31	31	31	31	31	31	31	31	31	31	31	31	31	31
	Superficial Peroneal nerve entrapment (SPNE)	15	15	15	15	15	15	15	15	15	15	15	15	15	15	15	15	15	15	15	15	15	15	15	15	15	15	15	15	15	15	15	15	15	15	15	15	15	15	15	15	15	15	15	15	15	15	15	15
	Myofascial tears	3	3	3	3	3	3	3	3	3	3	3	3	3	3	3	3	3	3	3	3	3	3	3	3	3	3	3	3	3	3	3	3	3	3	3	3	3	3	3	3	3	3	3	3	3	3	3	3
	Radiculopathy/ sciatica	7	7	7	7	7	7	7	7	7	7	7	7	7	7	7	7	7	7	7	7	7	7	7	7	7	7	7	7	7	7	7	7	7	7	7	7	7	7	7	7	7	7	7	7	7	7	7	7
	Popliteal Artery Entrapment Syndrome (PAES)	22	22	22	22	22	22	22	22	22	22	22	22	22	22	22	22	22	22	22	22	22	22	22	22	22	22	22	22	22	22	22	22	22	22	22	22	22	22	22	22	22	22	22	22	22	22	22	22
	McArdle syndrome	2	2	2	2	2	2	2	2	2	2	2	2	2	2	2	2	2	2	2	2	2	2	2	2	2	2	2	2	2	2	2	2	2	2	2	2	2	2	2	2	2	2	2	2	2	2	2	2
	Accessory low lying soleus muscle (ALLSM) (ASM)	5	5	5	5	5	5	5	5	5	5	5	5	5	5	5	5	5	5	5	5	5	5	5	5	5	5	5	5	5	5	5	5	5	5	5	5	5	5	5	5	5	5	5	5	5	5	5	5
	Average Percentage
	Chronic Exertional Compartment Syndrome (CECS)	1.69492	25.4237	8.47458	83.0508	0	0	25.4237	0	10.1695	0	79.661	10.1695	76.2712	0	0	0	1.69492	0	0	0	22.0339	0	0	0	0	76.2712	5.08475	0	0	0	1.69492	44.0678	20.339	0	5.08475	8.47458	35.5932	15.2542	20.339	0	54.2373	37.2881	3.38983	22.0339	0	1.69492	0	0
	Medial Tibial Stress Syndrome (MTSS)	0	38.0952	0	71.4286	0	4.7619	14.2857	9.52381	0	0	76.1905	0	4.7619	80.9524	4.7619	0	0	0	0	100	0	4.7619	0	0	0	85.7143	9.52381	0	0	0	0	0	0	0	0	4.7619	4.7619	0	0	0	4.7619	0	0	0	0	0	0	0
	Tibial stress fracture (Tibial SF)	6.45161	16.129	29.0323	48.3871	3.22581	25.8065	16.129	3.22581	32.2581	3.22581	54.8387	3.22581	3.22581	6.45161	9.67742	32.2581	0	16.129	74.1935	3.22581	0	45.1613	0	0	0	77.4194	22.5806	0	0	0	0	0	0	0	3.22581	0	0	0	0	0	0	0	0	3.22581	0	0	0	0
	Superficial Peroneal nerve entrapment (SPNE)	6.66667	46.6667	13.3333	60	13.3333	20	13.3333	6.66667	0	6.66667	40	0	13.3333	0	0	6.66667	6.66667	0	0	0	6.66667	0	0	0	6.66667	40	13.3333	6.66667	26.6667	0	0	33.3333	66.6667	13.3333	40	26.6667	40	33.3333	26.6667	0	6.66667	0	0	6.66667	0	0	0	0
	Myofascial tears	0	0	0	33.3333	66.6667	33.3333	0	100	0	0	0	0	0	0	0	0	0	0	0	0	0	0	0	0	0	66.6667	33.3333	0	66.6667	0	0	33.3333	33.3333	0	0	0	33.3333	0	0	0	0	0	0	33.3333	0	0	0	0
	Radiculopathy/ sciatica	0	57.1429	0	0	28.5714	28.5714	14.2857	0	0	0	14.2857	0	0	0	0	0	0	0	0	0	0	0	14.2857	14.2857	0	28.5714	100	100	85.7143	100	0	42.8571	42.8571	14.2857	14.2857	28.5714	57.1429	42.8571	57.1429	0	0	0	0	0	0	0	0	0
	Popliteal Artery Entrapment Syndrome (PAES)	0	50	0	77.2727	0	4.54545	13.6364	4.54545	4.54545	4.54545	45.4545	9.09091	22.7273	0	0	9.09091	0	0	4.54545	0	24.0741	0	0	0	0	59.0909	9.09091	4.54545	13.6364	4.54545	18.1818	40.9091	31.8182	0	4.54545	4.54545	9.09091	0	0	18.1818	4.54545	31.8182	0	0	50	4.54545	0	0
	McArdle syndrome	0	0	0	100	0	0	50	0	0	0	0	0	0	0	0	0	0	0	0	0	0	0	0	0	100	50	0	0	0	0	0	0	0	0	0	0	50	0	0	0	50	50	50	0	0	0	100	50
	Accessory low lying soleus muscle (ALLSM) (ASM)	0	20	60	60	20	0	60	20	0	0	0	0	0	0	0	0	20	0	40	0	0	40	0	0	0	40	0	0	0	0	0	0	0	0	0	40	0	0	0	0	0	0	0	20	0	0	0	0
	History	CECS(59)	MTSS(21)	Tibial SF(31)	SPNES(15)	Myofascial tears(3)	Radiculopathy(7)	PAES(22)	McS(2)	ALLSMS(4)
Case history	Medical Hx of other pathologies	1.7	0	6.45161	6.66667	0	0	0	0	0
	No medical Hx	25.4	38.0952	16.129	46.6667	0	57.1429	50	0	20
	No trauma Hx	8.5	0	29.0323	13.3333	0	0	0	0	60
Pain onset	Direct/ indirect trauma onset	0	9.52381	3.22581	6.66667	100	0	4.54545	0	20
	Gradual onset of Px	10.2	0	32.2581	0	0	0	4.54545	0	0
	Sudden onset of Px	0	0	3.22581	6.66667	0	0	4.54545	0	0
	Gradual onset during exercise	79.7	76.1905	54.8387	40	0	14.2857	45.4545	0	0
	Acute change in training regimen	0	4.7619	45.1613	0	0	0	0	0	40
Pain behaviour	Exertional Px	83.1	71.4286	48.3871	60	33.3333	0	77.2727	100	60
	Non-exertional Px	0	0	3.22581	13.3333	66.6667	28.5714	0	0	20
	Px worse with weight bearing	0	0	16.129	0	0	0	0	0	0
	Px worse with coughing, setting, & bending forward	0	0	0	0	0	14.2857	0	0	0
	Px better with lying down or walking	0	0	0	0	0	14.2857	0	0	0
	Px relieved by rest	25.4	14.2857	16.129	13.3333	0	14.2857	13.6364	50	60
Pain timing	Px stops immediately after stopping	10.2	0	3.22581	0	0	0	9.09091	0	0
	Px subside after few mins to hours	76.3	4.7619	3.22581	13.3333	0	0	22.7273	0	0
	Px persist after stopping for hours to days	0	80.9524	6.45161	0	0	0	0	0	0
	Px can subside with continues activity	0	4.7619	9.67742	0	0	0	0	0	0
	Px at night	0	0	32.2581	6.66667	0	0	9.09091	0	0
	Px during rest	0	4.7619	25.8065	20	33.3333	28.5714	4.54545	0	0
	Px occur at consistent time and distance	22	0	0	6.66667	0	0	24.0741	0	0
Pain spread	Local pain	0	0	74.1935	0	0	0	4.54545	0	20
	Diffused pain	0	100	3.22581	0	0	0	0	0	0
Other history features	Swelling after exercise	1.7	0	0	6.66667	0	0	0	0	20
	Exercise intolerance	0	0	0	6.66667	0	0	0	100	0
	Symptoms	CECS(59)	MTSS(21)	Tibial SF(31)	SPNES(15)	Myofascial tears(3)	Radiculopathy(7)	PAES(22)	McS(2)	ALLSMS(5)
Pain descriptors	Dull aching Px	76.3	85.7143	77.4194	40	66.6667	28.5714	59.0909	50	40
	No symptoms	0	0	0	0	0	0	0	0	20
	Sharp Px	5.1	9.52381	22.5806	13.3333	33.3333	100	9.09091	0	0
	Shooting Px	0	0	0	6.66667	0	100	4.54545	0	0
	Radiating Px	0	0	0	26.6667	66.6667	85.7143	13.6364	0	0
	LBP	0	0	0	0	0	100	4.54545	0	0
	Burning	8.5	4.7619	0	26.6667	0	28.5714	4.54545	0	40
	Tightness	54.2	4.7619	0	6.66667	0	0	4.54545	50	0
	Cramps	37.3	0	0	0	0	0	31.8182	50	0
	Muscle strain feeling	33.4	0	0	0	0	0	0	50	0
	Tenderness after exercise	22	0	3.22581	6.66667	33.3333	0	0	0	20
	Intermittent claudication	0	0	0	0	0	0	50	0	0
Neurological symptoms	Restless leg	1.7	0	0	0	0	0	18.1818	0	0
	Weakness	35.6	4.7619	0	40	33.3333	57.1429	9.09091	50	0
	Sensory loss	15.3	0	0	33.3333	0	42.8571	0	0	0
Paraesthesia descriptors	Paraesthesia	44.1	0	0	33.3333	33.3333	42.8571	40.9091	0	0
	Altered sensation	20.3	0	0	26.6667	0	57.1429	0	0	0
	Numbness	20.3	0	0	66.6667	33.3333	42.8571	31.8182	0	0
	Pins & needles	0	0	0	13.3333	0	14.2857	0	0	0
	Tingling	5.1	0	3.22581	40	0	14.2857	4.54545	0	0
Thermal symptoms	Skin coolness	0	0	0	0	0	0	18.1818	0	0
	Poikilothermia	1.7	0	0	0	0	0	4.54545	0	0
Other symptoms	Early fatigue	0	0	0	0	0	0	0	100	0
	Myalgia	0	0	0	0	0	0	0	50	0
	Physical Findings /signs	CECS(59)	MTSS(21)	Tibial SF(31)	SPNES(15)	Myofascial tears(3)	Radiculopathy(7)	PAES(22)	McS(2)	ALLSMS(5)
General findings	No findings at rest	77.6	0	0	6.66667	0	0	50	50	40
	Findings only upon exercising	57.6	4.7619	6.45161	6.66667	0	28.5714	4.54545	0	0
	Symptoms reproduceable	20.3	4.7619	0	0	0	0	4.54545	0	0
Observation of posture and gait	Asymmetry noted	1.7	4.7619	0	0	0	0	4.54545	0	0
	Abnormal biomechanics	0	4.7619	3.22581	0	0	0	0	0	0
	Foot hyper-pronation	0	9.52381	0	0	0	0	0	0	0
	Slap foot gait	0	0	0	20	0	0	0	0	0
	Foot drop	18.6	0	0	13.3333	0	0	4.54545	0	0
Observation of the limb	Pallor limb	6.8	0	0	0	0	0	9.09091	0	0
	Cyanosis	11.9	0	0	0	0	0	13.6364	0	0
	Swelling	1.7	14.2857	45.1613	0	66.6667	0	9.09091	0	20
	Ankle swelling	0	0	6.45161	0	0	0	0	0	40
	Perfusion over affected area	16.9	0	3.22581	6.66667	33.3333	0	0	0	0
	Bruising	0	0	12.9032	0	0	0	0	0	0
	Hypertrophy	1.7	0	0	6.66667	0	0	4.54545	0	0
Palpation	Muscle herniation	35.6	0	0	6.66667	0	0	4.54545	0	0
	Skin coolness	3.4	0	0	0	0	0	18.1818	0	0
	Skin hotness	1.7	0	12.9032	0	0	0	4.54545	0	0
	Local tenderness	0	0	77.4194	0	0	0	0	0	0
	Diffuse tenderness	1.7	95.2381	0	0	0	0	0	0	0
	Tenderness after exercise	40.7	4.7619	6.45161	20	66.6667	0	9.09091	0	60
	Tense compartment	15.3	0	0	0	66.6667	14.2857	0	0	0
	Soft mass in the ankle region	0	0	0	0	0	0	0	0	60
ROM	Limited Lx ROM	0	0	0	0	0	57.1429	0	0	0
	Limited ROM	3.4	9.52381	16.129	20	0	0	0	0	0
	Px with stretching	16.9	0	0	0	0	57.1429	0	0	0
	Px with resistance	1.7	0	0	0	0	28.5714	0	0	0
	Ankle plantar flexion increases Px	0	0	0	0	0	0	4.54545	0	20
Neurological testings	Weakness	35.6	14.2857	0	66.6667	0	100	9.09091	100	0
	Hyposensitivity	13.6	0	6.45161	33.3333	33.3333	85.7143	0	0	0
	Altered sensation	45.8	0	0	46.6667	33.3333	71.4286	9.09091	0	0
	Reflexes defects	0	0	6.45161	13.3333	0	71.4286	0	0	0
Special tests	Positive Tuning fork	0	4.7619	64.5161	26.6667	0	14.2857	0	0	0
	Positive Tinel's	0	0	0	53.3333	66.6667	0	0	0	0
	Compression at fibular head increases Px	0	0	0	26.6667	0	0	0	0	0
	Reduced pulses by palpation	10.2	0	0	0	0	0	68.1818	0	0
	Positional loss of pulses (ADU)	3.4	0	0	0	0	0	59.0909	0	0
	Positive fulcrum test	0	0	32.2581	0	0	0	0	0	0
	Positive hop test	0	4.7619	48.3871	0	0	0	4.54545	0	0
	Positive SLR, femoral stretch and slump test	0	0	0	0	0	100	0	0	0
	Positive lasegues test	0	0	0	0	0	28.5714	0	0	0
	Diagnosis Criteria	CECS(59)	MTSS(21)	Tibial SF(31)	SPNES(15)	Myofascial tears(3)	Radiculopathy(7)	PAES(22)	McS(2)	ALLSMS(5)
History findings	Patients Hx	84.2105	95.2381	100	93.3333	66.6667	100	77.2727	100	60
	Exercise intolerance	0	0	0	0	0	0	0	100	0
	Other conditions exclusion	69.5	71.4286	51.6129	66.6667	66.6667	57.1429	59.0909	50	40
Symptoms	Symptoms	84.7	95.2381	100	93.3333	66.6667	100	77.2727	100	60
	Diffuse tenderness	0	61.9048	0	0	0	0	0	0	0
	Local tenderness	0	0	29.0323	0	0	0	0	0	0
	Exertional pain	27.1	14.2857	0	6.66667	0	0	4.54545	0	0
	Radiating pain	0	0	0	6.66667	0	14.2857	0	0	0
Physical findings	Physical findings	84.7	95.2381	100	93.3333	66.6667	85.7143	77.2727	100	40
	Symptoms reproducible by provoked tests	3.4	0	0	13.3333	0	0	4.54545	0	0
	Swelling after exercise	1.7	4.7619	0	0	0	0	0	0	0
	Ankle swelling/mass	0	0	0	0	0	0	0	0	20
	Motor deficit	3.4	9.52381	0	53.3333	0	100	9.09091	0	0
	Sensory deficit	10.2	0	0	73.3333	0	100	9.09091	0	0
	DTR deficit	0	0	0	40	0	100	0	0	0
	Positive Lasegues test	0	0	0	0	0	28.5714	0	0	0
	Hopping test	0	0	12.9032	0	0	0	0	0	0
	Reduced distal pulses	0	0	0	0	0	0	13.6364	0	0
	Fixed weakness	0	0	0	0	0	0	0	100	0
Further investigations	Elevated ICP	93.2	0	0	6.7	0	0	4.5	0	0
	Reduced exercise ABPI	0	0	0	0	0	0	36.3636	0	0
	Imaging modalities	37.3	66.6667	100	66.6667	66.6667	57.1429	77.2727	0	100
	Arterial doppler ultrasonography	3.4	0	0	6.66667	0	0	63.6364	0	0
	Reduced So2 by NIR'S	20.3	0	0	0	0	0	0	0	0
	High serum CK level	0	0	0	0	0	0	0	100	0
	Pathogenic mutation & no myophosphorylase activity	0	0	0	0	0	0	0	100	0
	Investigations	CECS(59)	MTSS(21)	Tibial SF(31)	SPNES(15)	Myofascial tears(3)	Radiculopathy(7)	PAES(22)	McS(2)	ALLSMS(5)
Invasive investigations	Blood tests	0	0	6.45161	6.66667	0	0	0	50	0
	Biopsy	0	0	0	0	0	0	0	50	0
	ICP	66.1	0	0	0	0	0	4.54545	0	0
	Exercise ABPI	0	0	0	0	0	0	54.5455	0	0
	Pathogenic mutation in both PYGM alleles	0	0	0	0	0	0	0	100	0
	No myophosphorylase activity	0	0	0	0	0	0	0	100	0
	High serum level of creatine kinase	0	0	0	0	0	0	0	100	0
Non-invasive investigations	X-ray	0	0	87.0968	6.66667	0	28.5714	0	0	20
	CT	1.7	14.2857	48.3871	0	0	28.5714	22.7273	0	0
	MRI	30.5	61.9048	87.0968	20	66.6667	71.4286	50	0	80
	USS	5.1	0	9.67742	6.66667	66.6667	0	31.8182	0	40
	Duplex ultrasonography/ultrasound	3.4	0	0	6.66667	0	0	68.1818	0	0
	CT angiogram (angiography) after exercise	0	0	9.67742	0	0	0	50	0	0
	Magnetic resonance angiogram (MRA) after exercise	5.1	0	0	0	0	0	40.9091	0	20
	Nuclear medicine (isotope bone scan, SPECT, PETS)	0	42.8571	54.8387	0	0	0	0	0	0
	Shear wave elastography (SWE)	3.4	0	0	0	0	0	0	0	0
	Duplex ultrasound with dynamic manoeuvres	3.4	0	0	0	0	0	22.7273	0	0
	Digital subtraction angiography (DSA)	0	0	0	0	0	0	4.54545	0	0
	Near-infrared spectrometry (NIRS)	27.1	0	0	0	0	0	0	0	0
	Electromyelogram=electromyography	5.1	0	0	33.3333	0	28.5714	0	0	0
	Nerve conduction	0	0	0	53.3333	0	71.4286	0	0	0
[truncated: 150 more columns]
