# Supplementary material for: Developing a diagnostic framework for patients presenting with Exercise Induced Leg Pain (EILP): a scoping review
Source: J Foot Ankle Res. 2023 Nov 21;16:82. doi: 10.1186/s13047-023-00680-6 (PMC10662794; doi:10.1186/s13047-023-00680-6)
Supplement: Supplementary file 5 — Additional file 5. Developing a framework for the diagnostic criteria of patients with EILP scoping review mixed method appraisal tool. The mixed method appraisal tool (MMAT) scoring for this review. [file 13047_2023_680_MOESM5_ESM.xlsx]

## Sheet: MMAT checklist
					SCREENING QUESTIONS		1. QUALITATIVE STUDIES					2. RANDOMIZED CONTROLLED TRIALS					3. NON-RANDOMIZED STUDIES					4. QUANTITATIVE DESCRIPTIVE STUDIES					5. MIXED METHODS STUDIES
RefID	First author/year	design	Total	Comment	S1. Are there clear research questions?	S2. Do the collected data allow to address the research questions?	1.1. Is the qualitative approach appropriate to answer the research question?	1.2. Are the qualitative data collection methods adequate to address the research question?	1.3. Are the findings adequately derived from the data?	1.4. Is the interpretation of results sufficiently substantiated by data?	1.5. Is there coherence between qualitative data sources, collection, analysis and interpretation?	2.1. Is randomization appropriately performed?	2.2. Are the groups comparable at baseline?	2.3. Are there complete outcome data?	2.4. Are outcome assessors blinded to the intervention provided?	2.5 Did the participants adhere to the assigned intervention?	3.1. Are the participants representative of the target population?	3.2. Are measurements appropriate regarding both the outcome and intervention (or exposure)?	3.3. Are there complete outcome data?	3.4. Are the confounders accounted for in the design and analysis?	3.5. During the study period, is the intervention administered (or exposure occurred) as intended?	4.1. Is the sampling strategy relevant to address the research question?	4.2. Is the sample representative of the target population?	4.3. Are the measurements appropriate?	4.4. Is the risk of nonresponse bias low?	4.5. Is the statistical analysis appropriate to answer the research question?	5.1. Is there an adequate rationale for using a mixed methods design to address the research question?	5.2. Are the different components of the study effectively integrated to answer the research question?	5.3. Are the outputs of the integration of qualitative and quantitative components adequately interpreted?	5.4. Are divergences and inconsistencies between quantitative and qualitative results adequately addressed?	5.5. Do the different components of the study adhere to the quality criteria of each tradition of the methods involved?
	Miller et al. 2021	Opinion piece / narrative review	0	qualitative narrative review	No	No
	Milgrom et al. 2021	Case series	3		Yes	Yes											Yes	Yes	Yes	Can't tell	Can't tell
	Lovelock et al. 2021	Systematic review	0		No	Yes
	Lindorsson et at. 2021	Case series	4		Yes	Yes											Yes	Yes	Yes	Can't tell	Yes
	Ghasabmahaleh et al. 2021	RCT	4		Yes	Yes						Yes	Yes	Yes	Yes	Can't tell
	Al-Tayef et al. 2021	Case report	2		Yes	Yes																Can't tell	Yes	Yes	Can't tell	Can't tell
	Winters 2020	opinion piece / narrative review	0		No	Can't tell
	Winkes et al. 2020	Opinion piece / narrative review	0		No	Can't tell
	Velasco et al. 2020	Opinion piece / narrative review	0		No	Can't tell
	Van Zantvoot et al. 2020	Case series	3		Yes	Yes																Yes	Yes	Yes	Can't tell	Can't tell
	Rosenthal et al. 2020	Case report	0		No	No
	Pedret et al, 2020	Retrospective case series	4	Retrospective	Yes	Yes											Yes	Yes	Yes	Yes	Can't tell
	Nawkibu et al. 2020	Opinion piece / narrative review	3		Yes	Yes	Yes	Yes	Can't tell	Can't tell	Yes
	Finnoff et al. 2020	Case report	2		Yes	Yes																Yes	Can't tell	Yes	Can't tell	Can't tell
	De Bruijn et al. 2020	Opinion piece / narrative review	0		No	Can't tell
	Thein et al. 2019	Non-RCT	4		Yes	Yes											Yes	Yes	Yes	Can't tell	Yes
	Satpute et al. 2019	RCT	5		Yes	Yes						Yes	Yes	Yes	Yes	Yes
	Lohrer et al. 2019	Systematic review	0		No	No
	Kokalj et al. 2019	case report	2		Yes	No																Can't tell	Yes	Yes	Can't tell	Can't tell
	Drigny et al. 2019	Case report	3		Yes	Yes																Can't tell	Yes	Yes	Can't tell	Yes
	Winters et al. 2018	Cross-sectional study	4		Yes	Yes											Yes	Yes	Yes	Can't tell	Yes
	Truex et al. 2018	Case report	2		Yes	Yes																Yes	Can't tell	Yes	Can't tell	Can't tell
	Henry et al 2018	Case report	2		Yes	Yes																Can't tell	Yes	Yes	Can't tell	Can't tell
	Hameed et al 2018	opinion piece / narrative review	3		Yes	Yes	Yes	Yes	Yes	Can't tell	Can't tell
	Fouasson-Chailloux et al. 2018	Case series	4		Yes	Yes											Yes	Yes	Yes	Can't tell	Yes
	de Bruijn et al. 2018	Retrospective case series	4		Yes	Yes											Yes	Yes	Yes	Can't tell	Yes
	Carneiro Junior ET AL. 2018	Case report	2		Yes	Yes																Can't tell	Yes	Yes	Can't tell	Can't tell
	Wuellner et al. 2017	opinion piece / narrative review	0		No	No
	Vajapey et al. 2017	Systematic review	0		No	Can't tell
	Drexler et al, 2017	Case series	4		Yes	Yes																Yes	Yes	Yes	Can't tell	Yes
	Cosculluela et al, 2017	opinion piece / narrative review	2		Yes	Yes	Yes	Yes	Can't tell	Can't tell	Can't tell
	Cormier et al, 2017	Case report	3		Yes	Yes																Can't tell	Yes	Yes	Can't tell	Yes
	Rajasekaran et al, 2016	Opinion piece / narrative review	0		No	No
	Orli et al, 2016	Cross-sectional study	4		Yes	Yes											Yes	Yes	Yes	Can't tell	Yes
	Mclnnis et al, 2016	Systematic review	0		No	No																					Yes	Can't tell	Can't tell	Can't tell	Can't tell
	Feldman et al, 2016	Opinion piece / narrative review	0		No	No
	Braver 2016	Opinion piece / narrative review	0		No	No
	Rubio et al, 2015	Case report	2		Yes	Yes	Can't tell	Yes	Yes	Can't tell	Can't tell
	Roscoe et al, 2015	Case control study	4		Yes	Yes											Yes	Yes	Yes	No	Yes
	Myers et al, 2015	Case report	0		No	No
	Joy et al, 2015	Opinion piece / narrative review	0		No	No
	Flick et al, 2015	Opinion piece / narrative review	0		No	No
	Burrus et al, 2015	Opinion piece / narrative review	0		No	No
	Bonasia et al, 2015	Opinion piece / narrative review	3		Yes	Yes	Yes	Yes	Yes	No	No
	Williamson et al, 2014	Opinion piece / narrative review	0		No	No
	Tsilogianni et al, 2014	Case report	3		Yes	Yes																No	Yes	Yes	Can't tell	Yes
	Jovicic et al, 2014	Case report	3		Yes	Yes																Yes	Yes	Yes	Can't tell	Can't tell
	Dunn et al, 2014	Opinion piece / narrative review	0		No	No
	Craig 2013	Opinion piece / narrative review	0		No	No
	Pegrum et al, 2012	Opinion piece / narrative review	3		Yes	Yes	Yes	Yes	Yes	No	No
	Murray et al, 2012	Opinion piece / narrative review	2		Yes	Yes	Yes	No	Can't tell	Can't tell	Can't tell
	Murdock et al, 2012	opinion piece / narrative review	0		No	No
	Lane et al, 2012	Case series	3		Yes	Yes											Yes	Yes	Yes	Can't tell	Can't tell
	George et al, 2012	opinion piece / narrative review	0		No	No
	Patel et al, 2011	opinion piece / narrative review	3		Yes	Yes	Yes	Yes	Yes	Can't tell	Can't tell
	Wilder et al, 2010	opinion piece / narrative review	0		No	No
	Boxem et al, 2010	Opinion piece / narrative review	0		No	No
	McDonald et al, 2010	Opinion piece / narrative review	0		No	No
	Harrast et al, 2010	Opinion piece / narrative review	0		No	No
	Gill et al, 2010	Opinion piece / narrative review	3		Yes	Yes	Yes	Yes	Yes	Can't tell	Can't tell
	Moen et al, 2009	Systematic review	e		Yes	Yes	Yes	Yes	Yes	Can't tell	Can't tell
	Galbraith et al, 2009	Systematic review	3		Yes	Yes	Yes	Yes	Yes	Can't tell	Can't tell
	McAree et al 2008	Case report	3		Yes	Yes																Can't tell	Yes	Yes	No	Yes
	Lucia et al, 2008	Opinion piece / narrative review	2	qualitative narrative review	Yes	Yes	Yes	Yes	Can't tell	Can't tell	Can't tell
	Farr et al, 2008	Case report	2		Yes	Yes																Can't tell	Yes	Yes	Can't tell	Can't tell
	Young et al, 2006	opinion piece / narrative review	0		No	No
	Yang et al, 2006	Case report	3		Yes	Yes																Can't tell	Yes	Yes	Can't tell	Yes
	Tzortziou et al, 2006	Cross-sectional study	4		Yes	Yes																Yes	Yes	Yes	Can't tell	Yes
	Scharml et al, 2006	Case report	2		Yes	Yes																Yes	No	Yes	Can't tell	Can't tell
	Fredericson et al, 2006	Opinion piece / narrative review	0		No	No
	Englund 2005	Opinion piece / narrative review	0		No	No
	Dimauro et al, 2005	case series	2		Yes	Yes	Yes	Yes	Can't tell	Can't tell	Can't tell
	Moeyersoons et al 2005	Opinion piece / narrative review	4		Yes	Yes											Yes	Yes	Yes	Can't tell	Yes
	Yates et al, 2004	Cohort study	4		Yes	Yes											Yes	Yes	Yes	Can't tell	Yes
	Pell 4th et al 2004	opinion piece / narrative review	0		No	No
	Peris 2003	Opinion piece / narrative review	3		Yes	Yes	Yes	Yes	Yes	No	Can't tell
	Brennan et al, 2003	Opinion piece / narrative review	2		Yes	Yes	Yes	Yes	No	Can't tell	Can't tell
	Nelson et al, 2002	Opinion piece / narrative review	0		No	No
	Lauder et al, 2002	Case report	3		Yes	Yes																Yes	Yes	Yes	Can't tell	Can't tell
	Couture et al, 2002	Opinion piece / narrative review	0		No	No
	Korkola et al, 2001	Opinion piece / narrative review	3		Yes	Yes	Yes	Yes	Yes	Can't tell	Can't tell
	Fabre et al, 2000	Case series	4		Yes	Yes																Yes	Yes	Yes	Can't tell	Yes
	Boden et al, 2000	Opinion piece / narrative review	0		No	No
	Van der Velde et al, 1999	Case series	3		Yes	Yes																Yes	Yes	Yes	No	Can't tell
	Touliopolous et al, 1999	Opinion piece / narrative review	3		Yes	Yes	Yes	Yes	Yes	Can't tell	Can't tell
	Stager et al, 1999	opinion piece / narrative review	0		No	No
	Palaniappan et al, 1999	opinion piece / narrative review	2		Yes	Yes																Yes	Yes	Can't tell	Can't tell	Can't tell
	Bryan III et al, 1999	Case report	4		Yes	Yes																Yes	Yes	Yes	Can't tell	Yes
	Padhiar et al, 1997	opinion piece / narrative review	3		Yes	Yes																Yes	Yes	Yes	Can't tell	Can't tell
	Burkner et al, 1997	Opinion piece / narrative review	0		No	No
	Brodie et al, 1997	Case report	2		Yes	Yes																Yes	Yes	Can't tell	Can't tell	Can't tell
	Schepsis et al, 1996	Opinion piece / narrative review	3		Yes	Yes	Yes	Yes	Yes	Can't tell	No
	Ross 1996	Opinion piece / narrative review	0		No	No
	Hutchinsom et al, 1994	Opinion piece / narrative review	2		Yes	Yes	Yes	Yes	No	Can't tell	Can't tell
	Moeyersoons et al, 1992	Narrative review	4		Yes	Yes											Yes	Yes	Yes	Can't tell	Yes
	Clayer et al, 1992	Case series	4		Yes	Yes																Yes	Yes	Yes	No	Yes
	Ha et al, 1991	Case series	4		Yes	Yes											Yes	Yes	Yes	Can't tell	Yes
	Pedowitz et al, 1990	Retrospective case series	4		Yes	Yes											Yes	Yes	Yes	Yes	Can't tell	Yes	Yes	Yes	Can't tell	Can't tell
	Grimley et al, 1990	Case report	3		Yes	Yes																Yes	Yes	Yes	No	Can't tell
	Styf 1989	opinion piece / narrative review	0		No	No
	Leach et al, 1989	Case series	4		Yes	Yes											Yes	Yes	Yes	Can't tell	Yes
	Styf 1988	Case series	4		Yes	Yes											Yes	Yes	Yes	Can't tell	Yes
	Allen 1988	Case report	3		Yes	Yes																Yes	Yes	Yes	Can't tell	Can't tell
	Styf et al, 1987	Case series	4		Yes	Yes											Yes	Yes	Yes	Can't tell	Yes
	Fronek et al, 1987	Case series	3		Yes	Yes											Yes	Can't tell	Yes	Can't tell	Yes
	Romanus et al. 1986	Case report	3		Yes	Yes																Yes	Yes	Yes	Can't tell	Can't tell
	Detmer 1986	opinion piece / narrative review	0		No	No
	McAuliffe et al, 1985	Case report	3		Yes	Yes																Yes	Yes	Yes	Can't tell	Can't tell
	Detmer et al, 1985	Case series	2		Yes	Yes	Yes	Yes	No	No	No
	Bell 1985	Case report	2		Yes	Yes																Yes	Can't tell	Yes	Can't tell	Can't tell
	Wallensten et al, 1984	Case control study	3		Yes	Yes											Yes	Yes	Yes	Can't tell	Can't tell
	Orava et al, 1984	Case series	4		Yes	Yes											Yes	Yes	Yes	No	Yes
	Mubarak et al, 1982	Case series	3		Yes	Yes											Yes	Yes	Yes	No	Can't tell
	Veith et al, 1980	Case control study	3		Yes	Yes											Yes	Yes	Yes	No	No
	McDonald et al, 1980	Case report	4		Yes	Yes																Yes	Yes	Yes	Can't tell	Yes
	Reneman 1975	Opinion piece / narrative review	2		Yes	Yes	Yes	Yes	Can't tell	No	Can't tell
	Puranen 1974	Case series	3		Yes	Yes																Yes	Yes	Yes	Can't tell	No
	Clement 1974	Case series	0		No	No
	Leach et al, 1964	opinion piece / narrative review	0		No	No
			2
			0
			3
			3
			2.00847

## Sheet: Drop list
Systematic review
Non-systematic review
Case study
Cohort study
RCT
Non-RCT
Cross-sectional study
Survey
Case report
Case series
